# Supplementary material for: MiR-708 promotes steroid-induced osteonecrosis of femoral head, suppresses osteogenic differentiation by targeting SMAD3
Source: PubMed Central journal article supplement (PMC4773864; doi:10.1038/srep22599), 2016-03-02
Supplement: srep22599-s2.pdf [file srep22599-s2.pdf]

# **MiR-708 promotes steroid-induced osteonecrosis of femoral head, suppresses osteogenic differentiation by targeting SMAD3**

Cheng Hao<sup>1#</sup>, Shuhua Yang<sup>1</sup>, Weihua Xu<sup>1#</sup>, Jacson K Shen<sup>2</sup>, Shunan Ye<sup>1</sup>, Xianzhe Liu<sup>1</sup>, Zhe Dong<sup>1</sup>, Baojun Xiao<sup>1</sup> and Yong Feng<sup>1,2\*</sup>

## **AUTHOR AFFILIATIONS**

1 Orthopedic Hospital, Union Hospital, Tongji Medical College, Huazhong University of Science and Technology, Wuhan, Hubei, PR China

2 Sarcoma Biology Laboratory, Department of Orthopaedic Surgery, Massachusetts General Hospital and Harvard Medical School, 55 Fruit Street, Jackson 1115, Boston, Massachusetts 02114

#Cheng Hao and Weihua Xu contributed equally to this work

\*Correspondence to: Yong Feng, Orthopedic Hospital, Union Hospital, Tongji Medical College, Huazhong University of Science and Technology, Wuhan, Hubei, PR China. Telephone: 86-27-8535-1627, Fax: 86-27-8535-1627, E-mail: fengyong1980@gmail.com

**Table 1. Characteristics and mark number of chosen patients**

| <b>mark number</b> | <b>age</b> | <b>gender</b> | <b>Ficat stage</b> | <b>GCs use history</b> |
|--------------------|------------|---------------|--------------------|------------------------|
| GCs 1*             | 28         | female        | II                 | yes                    |
| Con 1*             | 32         | female        | II                 | no                     |
| GCs 2              | 46         | male          | II                 | yes                    |
| Con 2              | 48         | male          | II                 | no                     |
| GCs 3              | 39         | male          | III                | yes                    |
| Con 3              | 35         | male          | III                | no                     |
| GCs 4              | 31         | male          | II                 | yes                    |
| Con 4              | 27         | male          | II                 | no                     |
| GCs 5              | 45         | female        | IV                 | yes                    |
| Con 5              | 46         | female        | IV                 | no                     |
| GCs 6              | 36         | male          | III                | yes                    |
| Con 6              | 37         | male          | III                | no                     |

\* means GCs Group patient 1 and Control Group patient 1, and so on.

**Table 2. RT-PCR Oligonucleotide Primers**

| <b>RNA name</b> | <b>Primer sequence 5'→3'</b> |
|-----------------|------------------------------|
| β-Actin Forward | GTCCACCGCAAATGCTTCTA         |
| β-Actin Reverse | TGCTGTCACCTTCACCGTTC         |
| SMAD3 Forward   | CCTCTCCAGCAATAATCCGAA        |
| SMAD3 Reverse   | TGCCCAATTTTCTTTACCAGT        |
| SMAD4 Forward   | ACTTGGCATCTCTACATTGTCC       |
| SMAD4 Reverse   | GCCACATCTATTTTGCTTGCT        |
| RUNX2 Forward   | GGACGAGGCAAGAGTTTCAC         |
| RUNX2 Reverse   | GAGGCGGTCAGAGAACAAC          |

**Table 3. Different expression of miRNAs between sample GCs1 and Con 1**

| ProbeSetID                              | GCs 1    | GCs 1.call | Con 1    | Con 1.call | Ratio  | Ratio.call |
|-----------------------------------------|----------|------------|----------|------------|--------|------------|
| 24 miRNAs overexpression in GCs 1 MSCs  |          |            |          |            |        |            |
| hsa-miR-1207-5p_st                      | 88.48672 | P          | 40.86261 | P          | 2.1655 | P          |
| hsa-miR-125a-3p_st                      | 79.44888 | P          | 33.82151 | P          | 2.3491 | P          |
| hsa-miR-1268_st                         | 122.9203 | P          | 51.15377 | P          | 2.403  | P          |
| hsa-miR-1268b_st                        | 104.0176 | P          | 51.75887 | P          | 2.0097 | P          |
| hsa-miR-1275_st                         | 376.8623 | P          | 144.6312 | P          | 2.6057 | P          |
| hsa-miR-1307_st                         | 340.3954 | P          | 158.3513 | P          | 2.1496 | P          |
| hsa-miR-138-1-star_st                   | 288.178  | P          | 64.76934 | P          | 4.4493 | P          |
| hsa-miR-138_st                          | 3124.454 | P          | 798.2524 | P          | 3.9141 | P          |
| hsa-miR-1587_st                         | 18.27409 | P          | 7.309891 | P          | 2.4999 | P          |
| hsa-miR-23a-star_st                     | 256.4548 | P          | 69.45473 | P          | 3.6924 | P          |
| hsa-miR-25-star_st                      | 18.09319 | P          | 7.685211 | P          | 2.3543 | P          |
| hsa-miR-3138_st                         | 10.13937 | P          | 2.18684  | A          | 4.6365 | P          |
| hsa-miR-3141_st                         | 149.2077 | P          | 63.35411 | P          | 2.3551 | P          |
| hsa-miR-3909_st                         | 8.134102 | P          | 3.663411 | P          | 2.2204 | P          |
| hsa-miR-4298_st                         | 519.0026 | P          | 204.6377 | P          | 2.5362 | P          |
| hsa-miR-4304_st                         | 66.17074 | P          | 13.61831 | P          | 4.859  | P          |
| hsa-miR-4443_st                         | 123.7881 | P          | 58.70681 | P          | 2.1086 | P          |
| hsa-miR-4487_st                         | 25.30063 | P          | 7.805188 | P          | 3.2415 | P          |
| hsa-miR-543_st                          | 6.484666 | P          | 3.168579 | P          | 2.0466 | P          |
| hsa-miR-615-5p_st                       | 8.406401 | P          | 3.925661 | A          | 2.1414 | P          |
| hsa-miR-671-3p_st                       | 28.62154 | P          | 13.05424 | P          | 2.1925 | P          |
| hsa-miR-770-5p_st                       | 5.911391 | P          | 2.71108  | A          | 2.1805 | P          |
| hsa-miR-92a-1_st                        | 6.98929  | P          | 3.457691 | A          | 2.0214 | P          |
| hsa-miR-941_st                          | 11.43651 | P          | 3.275517 | A          | 3.4915 | P          |
| 50 miRNAs underexpression in GCs 1 MSCs |          |            |          |            |        |            |
| hsa-let-7i-star_st                      | 2.109525 | A          | 6.109076 | P          | 0.3453 | P          |
| hsa-miR-1231_st                         | 3.046926 | A          | 10.18689 | P          | 0.2991 | P          |
| hsa-miR-124_st                          | 2.627133 | A          | 35.00599 | P          | 0.075  | P          |
| hsa-miR-125b-2-star_st                  | 2.482835 | A          | 6.993793 | P          | 0.355  | P          |
| hsa-miR-1270_st                         | 2.263109 | A          | 4.773544 | P          | 0.4741 | P          |
| hsa-miR-151-3p_st                       | 13.52336 | P          | 30.73665 | P          | 0.44   | P          |
| hsa-miR-152_st                          | 60.80596 | P          | 122.6588 | P          | 0.4957 | P          |
| hsa-miR-154_st                          | 2.110948 | A          | 4.677903 | P          | 0.4513 | P          |
| hsa-miR-181a_st                         | 167.1619 | P          | 375.215  | P          | 0.4455 | P          |
| hsa-miR-1908_st                         | 272.2883 | P          | 557.9352 | P          | 0.488  | P          |
| hsa-miR-195_st                          | 5.597762 | P          | 15.59494 | P          | 0.3589 | P          |
| hsa-miR-196b_st                         | 2.253664 | P          | 7.23118  | P          | 0.3117 | P          |
| hsa-miR-214-star_st                     | 3.530133 | P          | 17.43221 | P          | 0.2025 | P          |
| hsa-miR-224-star_st                     | 6.469038 | P          | 17.40992 | P          | 0.3716 | P          |

|                     |          |   |          |   |        |   |
|---------------------|----------|---|----------|---|--------|---|
| hsa-miR-2277-3p_st  | 7.726739 | P | 17.61835 | P | 0.4386 | P |
| hsa-miR-3180-3p_st  | 7.582824 | P | 21.36118 | P | 0.355  | P |
| hsa-miR-3185_st     | 106.2435 | P | 219.8447 | P | 0.4833 | P |
| hsa-miR-3188_st     | 3.904307 | A | 7.862194 | P | 0.4966 | P |
| hsa-miR-3195_st     | 33.32552 | P | 127.4547 | P | 0.2615 | P |
| hsa-miR-3196_st     | 975.9194 | P | 2004.934 | P | 0.4868 | P |
| hsa-miR-3197_st     | 5.765062 | A | 16.53351 | P | 0.3487 | P |
| hsa-miR-31_st       | 1007.72  | P | 2057.169 | P | 0.4899 | P |
| hsa-miR-331-3p_st   | 3.451929 | A | 7.873329 | P | 0.4384 | P |
| hsa-miR-34a_st      | 73.11859 | P | 191.0961 | P | 0.3826 | P |
| hsa-miR-34c-3p_st   | 16.26691 | P | 43.60644 | P | 0.373  | P |
| hsa-miR-34c-5p_st   | 2.90753  | A | 16.55114 | P | 0.1757 | P |
| hsa-miR-3615_st     | 5.166142 | A | 12.27675 | P | 0.4208 | P |
| hsa-miR-3622a-5p_st | 3.535996 | P | 7.634859 | P | 0.4631 | P |
| hsa-miR-3663-3p_st  | 57.63831 | P | 154.0791 | P | 0.3741 | P |
| hsa-miR-409-5p_st   | 3.618925 | P | 8.895913 | P | 0.4068 | P |
| hsa-miR-4286_st     | 4.582221 | P | 10.22683 | P | 0.4481 | P |
| hsa-miR-4317_st     | 5.563763 | P | 11.33158 | P | 0.491  | P |
| hsa-miR-4321_st     | 2.554576 | A | 5.678205 | P | 0.4499 | P |
| hsa-miR-4465_st     | 2.228638 | A | 4.864153 | P | 0.4582 | P |
| hsa-miR-4486_st     | 13.48293 | P | 48.83792 | P | 0.2761 | P |
| hsa-miR-4497_st     | 7028.993 | P | 26263.59 | P | 0.2676 | P |
| hsa-miR-4498_st     | 4.042892 | A | 8.54569  | P | 0.4731 | P |
| hsa-miR-4532_st     | 85.71832 | P | 273.8879 | P | 0.313  | P |
| hsa-miR-4634_st     | 12.24729 | P | 36.28807 | P | 0.3375 | P |
| hsa-miR-4665-5p_st  | 19.76414 | P | 40.56366 | P | 0.4872 | P |
| hsa-miR-4674_st     | 95.18689 | P | 244.3705 | P | 0.3895 | P |
| hsa-miR-4695-3p_st  | 3.23268  | P | 8.992185 | P | 0.3595 | P |
| hsa-miR-4721_st     | 18.05624 | P | 48.95474 | P | 0.3688 | P |
| hsa-miR-4730_st     | 4.221957 | P | 12.20957 | P | 0.3458 | P |
| hsa-miR-4734_st     | 255.0684 | P | 531.2877 | P | 0.4801 | P |
| hsa-miR-4745-5p_st  | 334.6163 | P | 670.5026 | P | 0.4991 | P |
| hsa-miR-484_st      | 2.283751 | A | 5.807216 | P | 0.3933 | P |
| hsa-miR-887_st      | 9.241057 | P | 20.14201 | P | 0.4588 | P |
| hsa-miR-943_st      | 3.195108 | P | 7.02274  | P | 0.455  | P |
| hsa-miR-99a_st      | 42.46676 | P | 113.5987 | P | 0.3738 | P |

**Table 4. Different expression of miRNAs between sample GCs2 and Con 2**

| <b>ProbeSetID</b>                      | <b>GCs 2</b> | <b>GCs 2.call</b> | <b>Con 2</b> | <b>Con 2.call</b> | <b>Ratio</b> | <b>Ratio.call</b> |
|----------------------------------------|--------------|-------------------|--------------|-------------------|--------------|-------------------|
| 52 miRNAs overexpression in GCs 2 MSCs |              |                   |              |                   |              |                   |
| hsa-miR-1228-star_st                   | 209.8376     | P                 | 99.4548      | P                 | 2.1099       | P                 |
| hsa-miR-1231_st                        | 9.963836     | P                 | 3.018058     | A                 | 3.3014       | P                 |
| hsa-miR-1909_st                        | 16.48049     | P                 | 7.495262     | P                 | 2.1988       | P                 |
| hsa-miR-1915_st                        | 1456.104     | P                 | 615.4554     | P                 | 2.3659       | P                 |
| hsa-miR-210_st                         | 605.955      | P                 | 278.2881     | P                 | 2.1774       | P                 |
| hsa-miR-214_st                         | 5680.75      | P                 | 2634.234     | P                 | 2.1565       | P                 |
| hsa-miR-2861_st                        | 1044.837     | P                 | 440.3198     | P                 | 2.3729       | P                 |
| hsa-miR-3124-5p_st                     | 6.097641     | P                 | 2.813545     | A                 | 2.1672       | P                 |
| hsa-miR-3180-3p_st                     | 10.76487     | P                 | 4.992606     | P                 | 2.1562       | P                 |
| hsa-miR-3180_st                        | 11.8036      | P                 | 4.123191     | A                 | 2.8627       | P                 |
| hsa-miR-3185_st                        | 192.3462     | P                 | 69.58349     | P                 | 2.7643       | P                 |
| hsa-miR-3188_st                        | 11.78586     | P                 | 2.559243     | A                 | 4.6052       | P                 |
| hsa-miR-3195_st                        | 41.80313     | P                 | 4.995592     | P                 | 8.368        | P                 |
| hsa-miR-3196_st                        | 996.6777     | P                 | 421.9544     | P                 | 2.3621       | P                 |
| hsa-miR-34c-3p_st                      | 26.72535     | P                 | 6.503896     | P                 | 4.1091       | P                 |
| hsa-miR-3615_st                        | 17.96207     | P                 | 6.923045     | P                 | 2.5945       | P                 |
| hsa-miR-3621_st                        | 39.37968     | P                 | 16.4656      | P                 | 2.3916       | P                 |
| hsa-miR-3648_st                        | 22.29397     | P                 | 10.77479     | P                 | 2.0691       | P                 |
| hsa-miR-3663-3p_st                     | 74.37399     | P                 | 34.54029     | P                 | 2.1533       | P                 |
| hsa-miR-3665_st                        | 6731.312     | P                 | 2774.795     | P                 | 2.4259       | P                 |
| hsa-miR-3940-5p_st                     | 506.6394     | P                 | 213.9685     | P                 | 2.3678       | P                 |
| hsa-miR-3960_st                        | 5808.405     | P                 | 2591.711     | P                 | 2.2411       | P                 |
| hsa-miR-4281_st                        | 224.4868     | P                 | 69.12266     | P                 | 3.2477       | P                 |
| hsa-miR-4324_st                        | 15.20699     | P                 | 7.268849     | P                 | 2.0921       | P                 |
| hsa-miR-4436b-5p_st                    | 22.22273     | P                 | 5.895072     | P                 | 3.7697       | P                 |
| hsa-miR-4466_st                        | 1721.334     | P                 | 715.4944     | P                 | 2.4058       | P                 |
| hsa-miR-4467_st                        | 25.61971     | P                 | 9.811595     | P                 | 2.6112       | P                 |
| hsa-miR-4486_st                        | 60.03091     | P                 | 11.10027     | P                 | 5.4081       | P                 |
| hsa-miR-4497_st                        | 8902.426     | P                 | 2573.851     | P                 | 3.4588       | P                 |
| hsa-miR-4505_st                        | 84.44164     | P                 | 25.57227     | P                 | 3.3021       | P                 |
| hsa-miR-4507_st                        | 55.60133     | P                 | 21.38451     | P                 | 2.6001       | P                 |
| hsa-miR-4516_st                        | 1287.78      | P                 | 576.8301     | P                 | 2.2325       | P                 |
| hsa-miR-4532_st                        | 124.5749     | P                 | 46.59902     | P                 | 2.6733       | P                 |
| hsa-miR-4634_st                        | 37.47656     | P                 | 5.174047     | A                 | 7.2432       | P                 |
| hsa-miR-4649-5p_st                     | 30.64105     | P                 | 14.42561     | P                 | 2.1241       | P                 |
| hsa-miR-4651_st                        | 126.5477     | P                 | 46.81691     | P                 | 2.703        | P                 |
| hsa-miR-4674_st                        | 237.3726     | P                 | 105.1655     | P                 | 2.2571       | P                 |
| hsa-miR-4689_st                        | 40.34288     | P                 | 18.77866     | P                 | 2.1483       | P                 |
| hsa-miR-4695-5p_st                     | 54.45475     | P                 | 21.09485     | P                 | 2.5814       | P                 |

|                    |          |   |          |   |        |   |
|--------------------|----------|---|----------|---|--------|---|
| hsa-miR-4707-5p_st | 249.3134 | P | 80.46018 | P | 3.0986 | P |
| hsa-miR-4721_st    | 29.12842 | P | 7.693567 | P | 3.7861 | P |
| hsa-miR-4734_st    | 310.225  | P | 114.2007 | P | 2.7165 | P |
| hsa-miR-4741_st    | 78.20836 | P | 30.63719 | P | 2.5527 | P |
| hsa-miR-4745-5p_st | 499.0054 | P | 241.2746 | P | 2.0682 | P |
| hsa-miR-4758-5p_st | 39.37746 | P | 18.78168 | P | 2.0966 | P |
| hsa-miR-4763-3p_st | 441.8569 | P | 176.2371 | P | 2.5072 | P |
| hsa-miR-4800-3p_st | 8.727445 | P | 3.074457 | P | 2.8387 | P |
| hsa-miR-483-5p_st  | 15.14517 | P | 6.621949 | P | 2.2871 | P |
| hsa-miR-485-5p_st  | 21.79527 | P | 9.208059 | P | 2.367  | P |
| hsa-miR-491-5p_st  | 42.57394 | P | 16.30896 | P | 2.6105 | P |
| hsa-miR-708_st     | 292.4446 | P | 122.4945 | P | 2.3874 | P |
| hsa-miR-762_st     | 631.2592 | P | 238.0936 | P | 2.6513 | P |

---

35 miRNAs underexpression in GCs 2 MSCs

|                       |          |   |          |   |        |   |
|-----------------------|----------|---|----------|---|--------|---|
| hsa-miR-106b-star_st  | 36.45475 | P | 113.9353 | P | 0.32   | P |
| hsa-miR-106b_st       | 128.9556 | P | 261.4259 | P | 0.4933 | P |
| hsa-miR-1246_st       | 17.16216 | P | 39.52103 | P | 0.4343 | P |
| hsa-miR-17-star_st    | 2.544924 | A | 7.100518 | P | 0.3584 | P |
| hsa-miR-181d_st       | 2.173367 | P | 5.54943  | P | 0.3916 | P |
| hsa-miR-1972_st       | 3.392031 | A | 20.15873 | P | 0.1683 | P |
| hsa-miR-20b_st        | 6.378437 | P | 13.41755 | P | 0.4754 | P |
| hsa-miR-212_st        | 7.514286 | P | 15.20402 | P | 0.4942 | P |
| hsa-miR-25-star_st    | 12.36935 | P | 30.95476 | P | 0.3996 | P |
| hsa-miR-25_st         | 9.053917 | P | 33.29024 | P | 0.272  | P |
| hsa-miR-29b-1-star_st | 10.73585 | P | 41.65932 | P | 0.2577 | P |
| hsa-miR-29b_st        | 2.845495 | P | 5.839915 | P | 0.4872 | P |
| hsa-miR-30a_st        | 6.257889 | P | 16.1631  | P | 0.3872 | P |
| hsa-miR-3197_st       | 9.293846 | A | 34.98965 | P | 0.2656 | P |
| hsa-miR-3613-5p_st    | 5.168764 | P | 12.79643 | P | 0.4039 | P |
| hsa-miR-3651_st       | 22.4279  | P | 45.62141 | P | 0.4916 | P |
| hsa-miR-378-star_st   | 2.8011   | A | 7.060409 | P | 0.3967 | P |
| hsa-miR-378c_st       | 7.98418  | P | 19.06822 | P | 0.4187 | P |
| hsa-miR-382_st        | 24.13431 | P | 55.63332 | P | 0.4338 | P |
| hsa-miR-3972_st       | 4.934426 | A | 13.37248 | P | 0.369  | P |
| hsa-miR-4304_st       | 12.38962 | P | 35.78807 | P | 0.3462 | P |
| hsa-miR-4443_st       | 61.11358 | P | 135.1194 | P | 0.4523 | P |
| hsa-miR-4487_st       | 5.015908 | P | 12.25874 | P | 0.4092 | P |
| hsa-miR-486-3p_st     | 3.731085 | P | 9.232656 | P | 0.4041 | P |
| hsa-miR-487b_st       | 25.42496 | P | 62.64977 | P | 0.4058 | P |
| hsa-miR-497_st        | 2.343576 | A | 5.085016 | P | 0.4609 | P |
| hsa-miR-505-star_st   | 14.99481 | P | 37.00866 | P | 0.4052 | P |
| hsa-miR-551b-star_st  | 2.747215 | A | 5.542988 | P | 0.4956 | P |
| hsa-miR-625_st        | 7.300247 | P | 15.19625 | P | 0.4804 | P |
| hsa-miR-629-star_st   | 3.287994 | P | 8.943404 | P | 0.3676 | P |

|                    |          |   |          |   |        |   |
|--------------------|----------|---|----------|---|--------|---|
| hsa-miR-652_st     | 14.10784 | P | 31.74179 | P | 0.4445 | P |
| hsa-miR-720_st     | 9.333636 | P | 21.96447 | P | 0.4249 | P |
| hsa-miR-766_st     | 2.386085 | A | 5.80447  | P | 0.4111 | P |
| hsa-miR-92a-1_st   | 5.019529 | P | 13.17309 | P | 0.381  | P |
| hsa-miR-93-star st | 12.68089 | P | 27.21088 | P | 0.466  | P |

---



**Table 5. Different expression of miRNAs between sample GCs3 and Con 3**

| ProbeSetID                              | GCs 3    | GCs 3.call | Con 3    | Con 3.call | Ratio  | Ratio.call |
|-----------------------------------------|----------|------------|----------|------------|--------|------------|
| 21 miRNAs overexpression in GCs 3 MSCs  |          |            |          |            |        |            |
| hsa-miR-127-3p_st                       | 1049.455 | P          | 505.2288 | P          | 2.0772 | P          |
| hsa-miR-127-5p_st                       | 14.44282 | P          | 2.746511 | A          | 5.2586 | P          |
| hsa-miR-193a-3p_st                      | 14.49871 | P          | 7.061127 | P          | 2.0533 | P          |
| hsa-miR-299-3p_st                       | 13.2114  | P          | 4.505029 | P          | 2.9326 | P          |
| hsa-miR-3180-3p_st                      | 11.35838 | P          | 4.723107 | A          | 2.4049 | P          |
| hsa-miR-335_st                          | 3.776224 | P          | 1.712869 | A          | 2.2046 | P          |
| hsa-miR-3609_st                         | 7.699952 | P          | 3.440807 | P          | 2.2378 | P          |
| hsa-miR-3613-5p_st                      | 22.05914 | P          | 4.51425  | P          | 4.8866 | P          |
| hsa-miR-409-3p_st                       | 189.09   | P          | 88.53043 | P          | 2.1359 | P          |
| hsa-miR-409-5p_st                       | 14.70197 | P          | 7.32889  | P          | 2.006  | P          |
| hsa-miR-431-star_st                     | 6.134541 | P          | 2.6926   | A          | 2.2783 | P          |
| hsa-miR-431_st                          | 44.1214  | P          | 18.47458 | P          | 2.3882 | P          |
| hsa-miR-4484_st                         | 66.98244 | P          | 27.87196 | P          | 2.4032 | P          |
| hsa-miR-483-5p_st                       | 48.34686 | P          | 12.2995  | P          | 3.9308 | P          |
| hsa-miR-493_st                          | 104.5967 | P          | 33.57061 | P          | 3.1157 | P          |
| hsa-miR-654-5p_st                       | 37.8026  | P          | 13.03812 | P          | 2.8994 | P          |
| hsa-miR-665_st                          | 44.51828 | P          | 12.25253 | P          | 3.6334 | P          |
| hsa-miR-708_st                          | 190.984  | P          | 89.01905 | P          | 2.1454 | P          |
| hsa-miR-720_st                          | 30.69121 | P          | 8.190856 | P          | 3.747  | P          |
| hsa-miR-874_st                          | 65.52345 | P          | 28.7247  | P          | 2.2811 | P          |
| hsa-miR-933_st                          | 10.24794 | P          | 5.091783 | A          | 2.0126 | P          |
| 39 miRNAs underexpression in GCs 3 MSCs |          |            |          |            |        |            |
| hsa-let-7b-star_st                      | 2.003789 | A          | 4.153776 | P          | 0.4824 | P          |
| hsa-let-7f_st                           | 76.197   | P          | 212.9013 | P          | 0.3579 | P          |
| hsa-miR-106b_st                         | 75.20846 | P          | 151.0142 | P          | 0.498  | P          |
| hsa-miR-1184_st                         | 8.815897 | P          | 34.45475 | P          | 0.2559 | P          |
| hsa-miR-138-1-star_st                   | 91.31638 | P          | 228.487  | P          | 0.3997 | P          |
| hsa-miR-148a_st                         | 3.017106 | P          | 9.405887 | P          | 0.3208 | P          |
| hsa-miR-1825_st                         | 3.877048 | P          | 12.37371 | P          | 0.3133 | P          |
| hsa-miR-1972_st                         | 3.070032 | A          | 8.893475 | P          | 0.3452 | P          |
| hsa-miR-19a_st                          | 2.437328 | P          | 5.071035 | P          | 0.4806 | P          |
| hsa-miR-19b_st                          | 4.497584 | P          | 16.85729 | P          | 0.2668 | P          |
| hsa-miR-20b_st                          | 2.950442 | P          | 10.64879 | P          | 0.2771 | P          |
| hsa-miR-21_st                           | 82.66455 | P          | 406.4422 | P          | 0.2034 | P          |
| hsa-miR-224_st                          | 2.283751 | P          | 5.221722 | P          | 0.4374 | P          |
| hsa-miR-25_st                           | 4.947055 | P          | 11.19656 | P          | 0.4418 | P          |
| hsa-miR-28-3p_st                        | 10.34019 | P          | 34.1643  | P          | 0.3027 | P          |
| hsa-miR-30a_st                          | 4.615528 | P          | 9.387289 | P          | 0.4917 | P          |
| hsa-miR-30c_st                          | 4.656307 | P          | 48.23899 | P          | 0.0965 | P          |

|                     |          |   |          |   |        |   |
|---------------------|----------|---|----------|---|--------|---|
| hsa-miR-3162-5p_st  | 6.1735   | P | 15.77745 | P | 0.3913 | P |
| hsa-miR-3177-3p_st  | 2.567162 | A | 8.97224  | P | 0.2861 | P |
| hsa-miR-3197_st     | 5.087512 | A | 14.04524 | P | 0.3622 | P |
| hsa-miR-3679-5p_st  | 7.416359 | P | 18.00422 | P | 0.4119 | P |
| hsa-miR-3911_st     | 13.09589 | P | 40.29239 | P | 0.325  | P |
| hsa-miR-3935_st     | 1.836445 | A | 4.140778 | P | 0.4435 | P |
| hsa-miR-4286_st     | 3.776224 | P | 7.606172 | P | 0.4965 | P |
| hsa-miR-4304_st     | 3.241375 | P | 33.76715 | P | 0.096  | P |
| hsa-miR-4436b-5p_st | 9.009513 | P | 23.04123 | P | 0.391  | P |
| hsa-miR-4443_st     | 49.56123 | P | 107.9548 | P | 0.4591 | P |
| hsa-miR-4486_st     | 6.066138 | P | 25.76669 | P | 0.2354 | P |
| hsa-miR-4487_st     | 5.722239 | P | 11.66737 | P | 0.4904 | P |
| hsa-miR-4655-5p_st  | 4.378256 | A | 10.03739 | P | 0.4362 | P |
| hsa-miR-4656_st     | 3.579862 | A | 7.767654 | P | 0.4609 | P |
| hsa-miR-4669_st     | 21.17814 | P | 62.6009  | P | 0.3383 | P |
| hsa-miR-4701-3p_st  | 5.1324   | P | 20.37171 | P | 0.2519 | P |
| hsa-miR-4788_st     | 2.06756  | A | 5.076513 | P | 0.4073 | P |
| hsa-miR-486-3p_st   | 6.994882 | P | 71.55325 | P | 0.0978 | P |
| hsa-miR-486-5p_st   | 11.18014 | P | 72.9583  | P | 0.1532 | P |
| hsa-miR-542-5p_st   | 3.209794 | P | 9.600534 | P | 0.3343 | P |
| hsa-miR-885-5p_st   | 2.047729 | A | 5.027822 | P | 0.4073 | P |
| hsa-miR-92a-1_st    | 5.485594 | P | 20.04762 | P | 0.2736 | P |

---

**Table 6. Different expression of miRNAs in at least 2 pairs**

| <b>ProbeSetID</b>  | <b>GCs1 vs<br/>Con1</b> | <b>Ratio.<br/>call</b> | <b>GCs2 vs<br/>Con2</b> | <b>Ratio.<br/>call</b> | <b>GCs3 vs<br/>Con3</b> | <b>Ratio.<br/>call</b> |
|--------------------|-------------------------|------------------------|-------------------------|------------------------|-------------------------|------------------------|
| hsa-miR-3180-3p_st | 0.355                   | P                      | 2.1562                  | P                      | 2.4049                  | P                      |
| hsa-miR-483-5p_st  | 1.5296                  | P                      | 2.2871                  | P                      | 3.9308                  | P                      |
| hsa-miR-708_st     | 0.9936                  | P                      | 2.3874                  | P                      | 2.1454                  | P                      |
| hsa-miR-3197_st    | 0.3487                  | P                      | 0.2656                  | P                      | 0.3622                  | P                      |
| hsa-miR-4304_st    | 4.859                   | P                      | 0.3462                  | P                      | 0.096                   | P                      |
| hsa-miR-4443_st    | 2.1086                  | P                      | 0.4523                  | P                      | 0.4591                  | P                      |
| hsa-miR-4486_st    | 0.2761                  | P                      | 5.4081                  | P                      | 0.2354                  | P                      |
| hsa-miR-4487_st    | 3.2415                  | P                      | 0.4092                  | P                      | 0.4904                  | P                      |
| hsa-miR-92a-1_st   | 2.0214                  | P                      | 0.381                   | P                      | 0.2736                  | P                      |
| hsa-miR-1972_st    | 1.0762                  | A                      | 0.1683                  | P                      | 0.3452                  | P                      |
| hsa-miR-20b_st     | 0.5416                  | P                      | 0.4754                  | P                      | 0.2771                  | P                      |
| hsa-miR-25_st      | 0.5211                  | P                      | 0.272                   | P                      | 0.4418                  | P                      |
| hsa-miR-4286_st    | 0.4481                  | P                      | 0.8079                  | P                      | 0.4965                  | P                      |
| hsa-miR-486-3p_st  | 0.975                   | P                      | 0.4041                  | P                      | 0.0978                  | P                      |
| hsa-miR-106b_st    | 1.0523                  | P                      | 0.4933                  | P                      | 0.489                   | P                      |
| hsa-miR-30a_st     | 1.0785                  | P                      | 0.3872                  | P                      | 0.4917                  | P                      |

**Table 7. Target gene prediction of hsa-mir-708 by online software**

| <b>MicroRNA</b> | <b>Target Gene</b> | <b>Prediction Program</b> |         |       |         |           |         |         |      |       | <b>SUM</b> |
|-----------------|--------------------|---------------------------|---------|-------|---------|-----------|---------|---------|------|-------|------------|
|                 |                    | DIANAmt                   | miRanda | miRDB | miRWalk | RNAhybrid | PICTAR4 | PICTAR5 | PITA | RNA22 |            |
| hsa-mir-708     | SMAD3              | ✓                         | ✓       |       |         |           |         | ✓       |      | ✓     | 4          |
| hsa-mir-708     | SMAD4              | ✓                         | ✓       |       | ✓       |           |         | ✓       |      | ✓     | 5          |



**Table 8. Target genes of hsa-mir-708 (SUM ≥ 4)**

| MicroRNA    | Gene     | DIANaT | miRanda | miRDB | miRWalk | RNAhybrid | PICTAR4 | PICTAR5 | PITA | RNA22 | Targetscan | SUM |
|-------------|----------|--------|---------|-------|---------|-----------|---------|---------|------|-------|------------|-----|
| hsa-miR-708 | AAK1     | 0      | 1       | 1     | 1       | 0         | 0       | 1       | 0    | 0     | 1          | 5   |
| hsa-miR-708 | AATK     | 1      | 1       | 0     | 1       | 0         | 0       | 1       | 0    | 0     | 1          | 5   |
| hsa-miR-708 | ABBA-1   | 1      | 1       | 0     | 1       | 0         | 0       | 1       | 0    | 0     | 1          | 5   |
| hsa-miR-708 | ABCA13   | 1      | 1       | 0     | 1       | 0         | 0       | 1       | 0    | 0     | 1          | 5   |
| hsa-miR-708 | ABCA3    | 1      | 1       | 0     | 1       | 0         | 0       | 1       | 0    | 0     | 0          | 4   |
| hsa-miR-708 | ABCA5    | 1      | 0       | 1     | 1       | 0         | 0       | 1       | 0    | 0     | 1          | 5   |
| hsa-miR-708 | ABCB8    | 1      | 1       | 0     | 0       | 0         | 0       | 1       | 0    | 0     | 1          | 4   |
| hsa-miR-708 | ABHD13   | 1      | 1       | 0     | 1       | 0         | 0       | 1       | 0    | 0     | 1          | 5   |
| hsa-miR-708 | ABHD2    | 1      | 0       | 0     | 1       | 0         | 0       | 1       | 0    | 0     | 1          | 4   |
| hsa-miR-708 | ABHD4    | 1      | 1       | 0     | 1       | 0         | 0       | 1       | 0    | 0     | 0          | 4   |
| hsa-miR-708 | ABI2     | 1      | 1       | 0     | 1       | 0         | 0       | 1       | 0    | 0     | 1          | 5   |
| hsa-miR-708 | ABLIM1   | 1      | 0       | 0     | 1       | 0         | 0       | 1       | 0    | 0     | 1          | 4   |
| hsa-miR-708 | ABLIM3   | 1      | 1       | 0     | 1       | 0         | 0       | 1       | 0    | 0     | 1          | 5   |
| hsa-miR-708 | ABTB2    | 1      | 1       | 0     | 1       | 0         | 0       | 1       | 0    | 0     | 0          | 4   |
| hsa-miR-708 | ACACA    | 1      | 1       | 0     | 1       | 0         | 0       | 0       | 0    | 0     | 1          | 4   |
| hsa-miR-708 | ACACB    | 0      | 1       | 0     | 1       | 0         | 0       | 1       | 0    | 0     | 1          | 4   |
| hsa-miR-708 | ACAD8    | 1      | 1       | 0     | 1       | 0         | 0       | 1       | 0    | 0     | 1          | 5   |
| hsa-miR-708 | ACHE     | 1      | 1       | 0     | 1       | 0         | 0       | 1       | 0    | 0     | 0          | 4   |
| hsa-miR-708 | ACOX3    | 1      | 1       | 0     | 1       | 0         | 0       | 0       | 0    | 0     | 1          | 4   |
| hsa-miR-708 | ACSF2    | 1      | 1       | 0     | 1       | 0         | 0       | 1       | 0    | 0     | 1          | 5   |
| hsa-miR-708 | ACTR2    | 1      | 1       | 0     | 1       | 0         | 0       | 1       | 0    | 0     | 0          | 4   |
| hsa-miR-708 | ACVR1B   | 1      | 1       | 0     | 1       | 0         | 0       | 1       | 0    | 0     | 1          | 5   |
| hsa-miR-708 | ADAM11   | 1      | 1       | 0     | 1       | 0         | 0       | 1       | 0    | 0     | 1          | 5   |
| hsa-miR-708 | ADAM19   | 1      | 1       | 0     | 1       | 0         | 0       | 1       | 0    | 0     | 1          | 5   |
| hsa-miR-708 | ADAM33   | 1      | 1       | 0     | 1       | 0         | 0       | 1       | 0    | 0     | 1          | 5   |
| hsa-miR-708 | ADAMTS14 | 1      | 1       | 0     | 1       | 0         | 0       | 1       | 0    | 0     | 1          | 5   |
| hsa-miR-708 | ADAMTSL1 | 1      | 1       | 0     | 1       | 0         | 0       | 1       | 0    | 0     | 0          | 4   |
| hsa-miR-708 | ADCY1    | 1      | 1       | 0     | 1       | 0         | 0       | 1       | 0    | 0     | 1          | 5   |
| hsa-miR-708 | ADCY2    | 1      | 1       | 0     | 0       | 0         | 0       | 1       | 0    | 0     | 1          | 4   |
| hsa-miR-708 | ADD2     | 1      | 1       | 0     | 1       | 0         | 0       | 1       | 0    | 0     | 1          | 5   |
| hsa-miR-708 | ADIPOQ   | 1      | 1       | 0     | 1       | 0         | 0       | 1       | 0    | 0     | 0          | 4   |
| hsa-miR-708 | ADM2     | 1      | 1       | 0     | 1       | 0         | 0       | 1       | 0    | 0     | 1          | 5   |
| hsa-miR-708 | ADRBK2   | 0      | 1       | 0     | 1       | 0         | 0       | 1       | 0    | 0     | 1          | 4   |
| hsa-miR-708 | AFAP1    | 1      | 1       | 0     | 1       | 0         | 0       | 0       | 0    | 0     | 1          | 4   |
| hsa-miR-708 | AFF1     | 1      | 1       | 0     | 1       | 0         | 0       | 1       | 0    | 0     | 1          | 5   |
| hsa-miR-708 | AFF4     | 1      | 1       | 1     | 1       | 0         | 0       | 1       | 0    | 0     | 1          | 6   |
| hsa-miR-708 | AGMAT    | 1      | 1       | 0     | 1       | 0         | 0       | 1       | 0    | 0     | 1          | 5   |
| hsa-miR-708 | AGPAT3   | 1      | 1       | 1     | 1       | 0         | 0       | 1       | 0    | 0     | 1          | 6   |
| hsa-miR-708 | AGPAT4   | 1      | 1       | 0     | 1       | 0         | 0       | 1       | 0    | 0     | 1          | 5   |

|             |          |   |   |   |   |   |   |   |   |   |   |   |
|-------------|----------|---|---|---|---|---|---|---|---|---|---|---|
| hsa-miR-708 | AGRN     | 1 | 1 | 0 | 1 | 0 | 0 | 1 | 0 | 0 | 1 | 5 |
| hsa-miR-708 | AGTRL1   | 0 | 1 | 0 | 1 | 0 | 0 | 1 | 0 | 0 | 1 | 4 |
| hsa-miR-708 | AHDC1    | 1 | 1 | 0 | 1 | 0 | 0 | 1 | 0 | 0 | 1 | 5 |
| hsa-miR-708 | AHRR     | 1 | 1 | 0 | 1 | 0 | 0 | 1 | 0 | 0 | 1 | 5 |
| hsa-miR-708 | AIFM2    | 1 | 1 | 0 | 1 | 0 | 0 | 1 | 0 | 0 | 1 | 5 |
| hsa-miR-708 | AK2      | 1 | 0 | 0 | 1 | 0 | 0 | 1 | 0 | 0 | 1 | 4 |
| hsa-miR-708 | AKAP11   | 1 | 1 | 0 | 1 | 0 | 0 | 1 | 0 | 0 | 1 | 5 |
| hsa-miR-708 | AKT2     | 1 | 1 | 0 | 0 | 0 | 0 | 1 | 0 | 0 | 1 | 4 |
| hsa-miR-708 | ALDH1A2  | 1 | 1 | 0 | 1 | 0 | 0 | 1 | 0 | 0 | 1 | 5 |
| hsa-miR-708 | ALDH3A2  | 1 | 1 | 0 | 1 | 0 | 0 | 1 | 0 | 0 | 1 | 5 |
| hsa-miR-708 | ALDH5A1  | 1 | 1 | 0 | 1 | 0 | 0 | 1 | 0 | 0 | 1 | 5 |
| hsa-miR-708 | ALG2     | 1 | 1 | 0 | 1 | 0 | 0 | 1 | 0 | 0 | 1 | 5 |
| hsa-miR-708 | ALG9     | 1 | 1 | 0 | 1 | 0 | 0 | 0 | 0 | 0 | 1 | 4 |
| hsa-miR-708 | ALKBH1   | 1 | 1 | 0 | 1 | 0 | 0 | 1 | 0 | 0 | 0 | 4 |
| hsa-miR-708 | ALKBH5   | 1 | 1 | 0 | 1 | 0 | 0 | 1 | 0 | 0 | 0 | 4 |
| hsa-miR-708 | ALPK3    | 1 | 1 | 0 | 1 | 0 | 0 | 1 | 0 | 0 | 1 | 5 |
| hsa-miR-708 | ALPL     | 1 | 1 | 0 | 1 | 0 | 0 | 1 | 0 | 0 | 1 | 5 |
| hsa-miR-708 | ALPP     | 1 | 1 | 0 | 1 | 0 | 0 | 1 | 0 | 0 | 1 | 5 |
| hsa-miR-708 | AMIGO2   | 1 | 1 | 0 | 0 | 0 | 0 | 1 | 0 | 0 | 1 | 4 |
| hsa-miR-708 | AMMECR1  | 1 | 1 | 0 | 1 | 0 | 0 | 1 | 0 | 0 | 1 | 5 |
| hsa-miR-708 | AMMECR1L | 1 | 1 | 0 | 1 | 0 | 0 | 1 | 0 | 0 | 1 | 5 |
| hsa-miR-708 | AMOTL1   | 1 | 1 | 0 | 1 | 0 | 0 | 1 | 0 | 0 | 1 | 5 |
| hsa-miR-708 | AMOTL2   | 1 | 1 | 0 | 0 | 0 | 0 | 1 | 0 | 0 | 1 | 4 |
| hsa-miR-708 | AMPD2    | 1 | 1 | 0 | 1 | 0 | 0 | 1 | 0 | 0 | 0 | 4 |
| hsa-miR-708 | AMPH     | 1 | 1 | 1 | 1 | 0 | 0 | 1 | 0 | 0 | 1 | 6 |
| hsa-miR-708 | AMZ1     | 1 | 1 | 0 | 1 | 0 | 0 | 1 | 0 | 0 | 1 | 5 |
| hsa-miR-708 | ANK1     | 1 | 1 | 0 | 0 | 0 | 0 | 1 | 0 | 0 | 1 | 4 |
| hsa-miR-708 | ANK2     | 1 | 1 | 0 | 1 | 0 | 0 | 1 | 0 | 0 | 1 | 5 |
| hsa-miR-708 | ANKRD13B | 1 | 1 | 0 | 1 | 0 | 0 | 1 | 0 | 0 | 1 | 5 |
| hsa-miR-708 | ANKRD23  | 1 | 1 | 0 | 1 | 0 | 0 | 1 | 0 | 0 | 1 | 5 |
| hsa-miR-708 | ANKRD32  | 1 | 1 | 0 | 1 | 0 | 0 | 1 | 0 | 0 | 1 | 5 |
| hsa-miR-708 | ANKRD37  | 1 | 1 | 0 | 1 | 0 | 0 | 1 | 0 | 0 | 1 | 5 |
| hsa-miR-708 | ANKRD45  | 1 | 1 | 0 | 1 | 0 | 0 | 1 | 0 | 0 | 1 | 5 |
| hsa-miR-708 | ANKS6    | 1 | 1 | 0 | 1 | 0 | 0 | 1 | 0 | 0 | 1 | 5 |
| hsa-miR-708 | ANXA9    | 1 | 1 | 0 | 1 | 0 | 0 | 1 | 0 | 0 | 1 | 5 |
| hsa-miR-708 | AOF2     | 1 | 0 | 0 | 1 | 0 | 0 | 1 | 0 | 0 | 1 | 4 |
| hsa-miR-708 | APIB1    | 1 | 1 | 0 | 1 | 0 | 0 | 1 | 0 | 0 | 1 | 5 |
| hsa-miR-708 | AP2A2    | 1 | 1 | 0 | 1 | 0 | 0 | 1 | 0 | 0 | 1 | 5 |
| hsa-miR-708 | AP2B1    | 1 | 1 | 1 | 1 | 0 | 0 | 1 | 0 | 0 | 1 | 6 |
| hsa-miR-708 | APAF1    | 1 | 1 | 0 | 1 | 0 | 0 | 1 | 0 | 0 | 1 | 5 |
| hsa-miR-708 | APBB2    | 1 | 1 | 0 | 0 | 0 | 0 | 1 | 0 | 0 | 1 | 4 |
| hsa-miR-708 | APEX2    | 1 | 1 | 0 | 1 | 0 | 0 | 1 | 0 | 0 | 1 | 5 |
| hsa-miR-708 | APOA1BP  | 0 | 1 | 0 | 1 | 0 | 0 | 1 | 0 | 0 | 1 | 4 |
| hsa-miR-708 | APOA2    | 1 | 1 | 0 | 1 | 0 | 0 | 1 | 0 | 0 | 1 | 5 |

|             |          |   |   |   |   |   |   |   |   |   |   |   |
|-------------|----------|---|---|---|---|---|---|---|---|---|---|---|
| hsa-miR-708 | APOA5    | 1 | 1 | 0 | 1 | 0 | 0 | 1 | 0 | 0 | 1 | 5 |
| hsa-miR-708 | APOBEC4  | 1 | 1 | 0 | 1 | 0 | 0 | 1 | 0 | 0 | 0 | 4 |
| hsa-miR-708 | APOC3    | 1 | 1 | 0 | 1 | 0 | 0 | 1 | 0 | 0 | 1 | 5 |
| hsa-miR-708 | APOOL    | 1 | 1 | 0 | 1 | 0 | 0 | 1 | 0 | 0 | 0 | 4 |
| hsa-miR-708 | APPBP2   | 1 | 1 | 0 | 0 | 0 | 0 | 1 | 0 | 0 | 1 | 4 |
| hsa-miR-708 | AQP6     | 1 | 1 | 0 | 1 | 0 | 0 | 1 | 0 | 0 | 1 | 5 |
| hsa-miR-708 | ARAF     | 1 | 1 | 0 | 1 | 0 | 0 | 1 | 0 | 0 | 1 | 5 |
| hsa-miR-708 | ARC      | 1 | 1 | 0 | 1 | 0 | 0 | 1 | 0 | 0 | 1 | 5 |
| hsa-miR-708 | ARCN1    | 1 | 1 | 0 | 1 | 0 | 0 | 1 | 0 | 0 | 0 | 4 |
| hsa-miR-708 | ARF5     | 1 | 1 | 0 | 1 | 0 | 0 | 1 | 0 | 0 | 1 | 5 |
| hsa-miR-708 | ARFGAP2  | 1 | 1 | 0 | 1 | 0 | 0 | 1 | 0 | 0 | 1 | 5 |
| hsa-miR-708 | ARFIP2   | 1 | 1 | 0 | 1 | 0 | 0 | 1 | 0 | 0 | 0 | 4 |
| hsa-miR-708 | ARHGAP1  | 1 | 1 | 0 | 1 | 0 | 0 | 1 | 0 | 0 | 0 | 4 |
| hsa-miR-708 | ARHGAP17 | 1 | 1 | 0 | 1 | 0 | 0 | 1 | 0 | 0 | 0 | 4 |
| hsa-miR-708 | ARHGAP19 | 1 | 1 | 0 | 1 | 0 | 0 | 1 | 0 | 0 | 1 | 5 |
| hsa-miR-708 | ARHGAP24 | 1 | 1 | 0 | 1 | 0 | 0 | 1 | 0 | 0 | 1 | 5 |
| hsa-miR-708 | ARHGEF9  | 1 | 1 | 0 | 0 | 0 | 0 | 1 | 0 | 0 | 1 | 4 |
| hsa-miR-708 | ARID2    | 1 | 1 | 0 | 1 | 0 | 0 | 1 | 0 | 0 | 0 | 4 |
| hsa-miR-708 | ARL2     | 1 | 1 | 0 | 1 | 0 | 0 | 1 | 0 | 0 | 0 | 4 |
| hsa-miR-708 | ARL3     | 1 | 1 | 0 | 1 | 0 | 0 | 1 | 0 | 0 | 0 | 4 |
| hsa-miR-708 | ARMC5    | 1 | 1 | 0 | 1 | 0 | 0 | 1 | 0 | 0 | 0 | 4 |
| hsa-miR-708 | ARMC6    | 1 | 1 | 0 | 1 | 0 | 0 | 1 | 0 | 0 | 0 | 4 |
| hsa-miR-708 | ARNT2    | 1 | 1 | 0 | 1 | 0 | 0 | 1 | 0 | 0 | 1 | 5 |
| hsa-miR-708 | ARPP-19  | 1 | 1 | 0 | 1 | 0 | 0 | 1 | 0 | 0 | 1 | 5 |
| hsa-miR-708 | ARPP-21  | 1 | 1 | 0 | 1 | 0 | 0 | 0 | 0 | 0 | 1 | 4 |
| hsa-miR-708 | ARRDC1   | 1 | 1 | 0 | 1 | 0 | 0 | 1 | 0 | 0 | 1 | 5 |
| hsa-miR-708 | ARRDC2   | 1 | 0 | 0 | 1 | 0 | 0 | 1 | 0 | 0 | 1 | 4 |
| hsa-miR-708 | ARSJ     | 1 | 1 | 0 | 1 | 0 | 0 | 1 | 0 | 0 | 0 | 4 |
| hsa-miR-708 | AS3MT    | 1 | 1 | 1 | 1 | 0 | 0 | 1 | 0 | 0 | 1 | 6 |
| hsa-miR-708 | AS AHL   | 1 | 1 | 0 | 1 | 0 | 0 | 1 | 0 | 0 | 0 | 4 |
| hsa-miR-708 | ASB1     | 1 | 1 | 0 | 1 | 0 | 0 | 1 | 0 | 0 | 1 | 5 |
| hsa-miR-708 | ASB13    | 1 | 1 | 0 | 1 | 0 | 0 | 1 | 0 | 0 | 0 | 4 |
| hsa-miR-708 | ASB15    | 1 | 1 | 0 | 1 | 0 | 0 | 1 | 0 | 0 | 1 | 5 |
| hsa-miR-708 | ASB5     | 1 | 1 | 1 | 1 | 0 | 0 | 1 | 0 | 0 | 1 | 6 |
| hsa-miR-708 | ASB8     | 1 | 1 | 0 | 0 | 0 | 0 | 1 | 0 | 0 | 1 | 4 |
| hsa-miR-708 | ASCC3    | 1 | 1 | 0 | 1 | 0 | 0 | 0 | 0 | 0 | 1 | 4 |
| hsa-miR-708 | ASPA     | 1 | 1 | 1 | 1 | 0 | 0 | 1 | 0 | 0 | 1 | 6 |
| hsa-miR-708 | ASXL1    | 1 | 1 | 0 | 1 | 0 | 0 | 1 | 0 | 0 | 0 | 4 |
| hsa-miR-708 | ATAD2B   | 0 | 1 | 1 | 1 | 0 | 0 | 1 | 0 | 0 | 1 | 5 |
| hsa-miR-708 | ATCAY    | 0 | 1 | 0 | 1 | 0 | 0 | 1 | 0 | 0 | 1 | 4 |
| hsa-miR-708 | ATHL1    | 1 | 1 | 0 | 1 | 0 | 0 | 1 | 0 | 0 | 1 | 5 |
| hsa-miR-708 | ATMIN    | 1 | 1 | 0 | 1 | 0 | 0 | 1 | 0 | 0 | 0 | 4 |
| hsa-miR-708 | ATOH8    | 1 | 1 | 0 | 1 | 0 | 0 | 1 | 0 | 0 | 0 | 4 |
| hsa-miR-708 | ATP11A   | 1 | 1 | 0 | 1 | 0 | 0 | 1 | 0 | 0 | 1 | 5 |



|             |          |   |   |   |   |   |   |   |   |   |   |   |
|-------------|----------|---|---|---|---|---|---|---|---|---|---|---|
| hsa-miR-708 | ATP2B3   | 1 | 1 | 0 | 1 | 0 | 0 | 1 | 0 | 0 | 1 | 5 |
| hsa-miR-708 | ATP5D    | 1 | 1 | 0 | 1 | 0 | 0 | 1 | 0 | 0 | 1 | 5 |
| hsa-miR-708 | ATP5SL   | 1 | 1 | 0 | 1 | 0 | 0 | 1 | 0 | 0 | 1 | 5 |
| hsa-miR-708 | ATP6V1A  | 1 | 1 | 1 | 1 | 0 | 0 | 1 | 0 | 0 | 1 | 6 |
| hsa-miR-708 | ATP6V1F  | 1 | 1 | 0 | 1 | 0 | 0 | 1 | 0 | 0 | 0 | 4 |
| hsa-miR-708 | ATP7A    | 1 | 1 | 0 | 1 | 0 | 0 | 1 | 0 | 0 | 0 | 4 |
| hsa-miR-708 | ATP8A1   | 1 | 1 | 0 | 1 | 0 | 0 | 1 | 0 | 0 | 1 | 5 |
| hsa-miR-708 | ATP9A    | 1 | 1 | 0 | 1 | 0 | 0 | 1 | 0 | 0 | 1 | 5 |
| hsa-miR-708 | ATPAF1   | 1 | 1 | 0 | 1 | 0 | 0 | 1 | 0 | 0 | 1 | 5 |
| hsa-miR-708 | ATRNL1   | 1 | 1 | 0 | 1 | 0 | 0 | 1 | 0 | 0 | 1 | 5 |
| hsa-miR-708 | ATRN     | 1 | 1 | 0 | 1 | 0 | 0 | 1 | 0 | 0 | 1 | 5 |
| hsa-miR-708 | ATXN1    | 1 | 0 | 0 | 1 | 0 | 0 | 1 | 0 | 0 | 1 | 4 |
| hsa-miR-708 | ATXN2L   | 1 | 1 | 0 | 1 | 0 | 0 | 1 | 0 | 0 | 0 | 4 |
| hsa-miR-708 | ATXN7L1  | 1 | 1 | 0 | 1 | 0 | 0 | 0 | 0 | 0 | 1 | 4 |
| hsa-miR-708 | AVPR1A   | 1 | 1 | 0 | 1 | 0 | 0 | 1 | 0 | 0 | 1 | 5 |
| hsa-miR-708 | AXIN2    | 1 | 1 | 0 | 1 | 0 | 0 | 1 | 0 | 0 | 0 | 4 |
| hsa-miR-708 | B3GNT3   | 1 | 1 | 1 | 0 | 0 | 0 | 1 | 0 | 0 | 1 | 5 |
| hsa-miR-708 | B4GALNT1 | 1 | 1 | 0 | 1 | 0 | 0 | 1 | 0 | 0 | 1 | 5 |
| hsa-miR-708 | B4GALNT3 | 1 | 1 | 0 | 1 | 0 | 0 | 1 | 0 | 0 | 1 | 5 |
| hsa-miR-708 | B4GALT3  | 1 | 1 | 0 | 1 | 0 | 0 | 1 | 0 | 0 | 1 | 5 |
| hsa-miR-708 | B4GALT4  | 1 | 1 | 0 | 1 | 0 | 0 | 0 | 0 | 0 | 1 | 4 |
| hsa-miR-708 | BACE1    | 1 | 1 | 0 | 1 | 0 | 0 | 1 | 0 | 0 | 1 | 5 |
| hsa-miR-708 | BAG1     | 0 | 1 | 1 | 1 | 0 | 0 | 1 | 0 | 0 | 1 | 5 |
| hsa-miR-708 | BAI1     | 1 | 1 | 0 | 1 | 0 | 0 | 1 | 0 | 0 | 1 | 5 |
| hsa-miR-708 | BAZ1B    | 1 | 1 | 0 | 1 | 0 | 0 | 1 | 0 | 0 | 1 | 5 |
| hsa-miR-708 | BBC3     | 1 | 1 | 0 | 1 | 0 | 0 | 1 | 0 | 0 | 0 | 4 |
| hsa-miR-708 | BBS1     | 1 | 1 | 0 | 1 | 0 | 0 | 1 | 0 | 0 | 1 | 5 |
| hsa-miR-708 | BBS10    | 1 | 1 | 1 | 1 | 0 | 0 | 1 | 0 | 0 | 1 | 6 |
| hsa-miR-708 | BBS5     | 1 | 1 | 0 | 1 | 0 | 0 | 1 | 0 | 0 | 1 | 5 |
| hsa-miR-708 | BCAM     | 1 | 1 | 0 | 1 | 0 | 0 | 1 | 0 | 0 | 1 | 5 |
| hsa-miR-708 | BCAT1    | 1 | 1 | 0 | 1 | 0 | 0 | 1 | 0 | 0 | 1 | 5 |
| hsa-miR-708 | BCL11B   | 1 | 1 | 0 | 1 | 0 | 0 | 1 | 0 | 0 | 0 | 4 |
| hsa-miR-708 | BCL2L11  | 1 | 1 | 0 | 1 | 0 | 0 | 1 | 0 | 0 | 1 | 5 |
| hsa-miR-708 | BCL2L15  | 1 | 1 | 0 | 1 | 0 | 0 | 1 | 0 | 0 | 1 | 5 |
| hsa-miR-708 | BCL7A    | 1 | 1 | 0 | 1 | 0 | 0 | 1 | 0 | 0 | 1 | 5 |
| hsa-miR-708 | BCR      | 1 | 1 | 0 | 1 | 0 | 0 | 1 | 0 | 0 | 1 | 5 |
| hsa-miR-708 | BDKRB2   | 1 | 1 | 0 | 1 | 0 | 0 | 1 | 0 | 0 | 1 | 5 |
| hsa-miR-708 | BEGAIN   | 1 | 0 | 1 | 1 | 0 | 0 | 1 | 0 | 0 | 1 | 5 |
| hsa-miR-708 | BET1     | 0 | 1 | 0 | 1 | 0 | 0 | 1 | 0 | 0 | 1 | 4 |
| hsa-miR-708 | BHLHB2   | 1 | 1 | 0 | 1 | 0 | 0 | 1 | 0 | 0 | 1 | 5 |
| hsa-miR-708 | BHMT2    | 1 | 1 | 0 | 1 | 0 | 0 | 1 | 0 | 0 | 1 | 5 |
| hsa-miR-708 | BICD2    | 1 | 1 | 0 | 1 | 0 | 0 | 1 | 0 | 0 | 0 | 4 |
| hsa-miR-708 | BIRC5    | 1 | 1 | 0 | 1 | 0 | 0 | 1 | 0 | 0 | 0 | 4 |
| hsa-miR-708 | BIRC6    | 1 | 1 | 0 | 1 | 0 | 0 | 1 | 0 | 0 | 0 | 4 |

|             |           |   |   |   |   |   |   |   |   |   |   |   |
|-------------|-----------|---|---|---|---|---|---|---|---|---|---|---|
| hsa-miR-708 | BIVM      | 1 | 0 | 0 | 1 | 0 | 0 | 1 | 0 | 0 | 1 | 4 |
| hsa-miR-708 | BLMH      | 1 | 1 | 0 | 1 | 0 | 0 | 1 | 0 | 0 | 1 | 5 |
| hsa-miR-708 | BMF       | 1 | 1 | 0 | 1 | 0 | 0 | 1 | 0 | 0 | 1 | 5 |
| hsa-miR-708 | BNIP1     | 1 | 1 | 0 | 1 | 0 | 0 | 0 | 0 | 0 | 1 | 4 |
| hsa-miR-708 | BRCA1     | 1 | 1 | 0 | 1 | 0 | 0 | 0 | 0 | 0 | 1 | 4 |
| hsa-miR-708 | BRD3      | 1 | 1 | 0 | 1 | 0 | 0 | 1 | 0 | 0 | 1 | 5 |
| hsa-miR-708 | BRF1      | 1 | 1 | 0 | 0 | 0 | 0 | 1 | 0 | 0 | 1 | 4 |
| hsa-miR-708 | BRPF3     | 1 | 1 | 0 | 1 | 0 | 0 | 1 | 0 | 0 | 1 | 5 |
| hsa-miR-708 | BRSK2     | 1 | 1 | 0 | 1 | 0 | 0 | 1 | 0 | 0 | 1 | 5 |
| hsa-miR-708 | BSN       | 1 | 1 | 0 | 1 | 0 | 0 | 1 | 0 | 0 | 1 | 5 |
| hsa-miR-708 | BTBD14B   | 1 | 1 | 0 | 1 | 0 | 0 | 1 | 0 | 0 | 1 | 5 |
| hsa-miR-708 | BTBD7     | 1 | 1 | 0 | 1 | 0 | 0 | 1 | 0 | 0 | 1 | 5 |
| hsa-miR-708 | BTLA      | 1 | 1 | 0 | 1 | 0 | 0 | 1 | 0 | 0 | 1 | 5 |
| hsa-miR-708 | BTRC      | 1 | 1 | 1 | 1 | 0 | 0 | 1 | 0 | 0 | 1 | 6 |
| hsa-miR-708 | BZRAP1    | 1 | 1 | 0 | 1 | 0 | 0 | 1 | 0 | 0 | 1 | 5 |
| hsa-miR-708 | C10orf118 | 1 | 1 | 0 | 1 | 0 | 0 | 1 | 0 | 0 | 1 | 5 |
| hsa-miR-708 | C10orf2   | 1 | 1 | 0 | 1 | 0 | 0 | 1 | 0 | 0 | 1 | 5 |
| hsa-miR-708 | C10orf25  | 1 | 1 | 0 | 0 | 0 | 0 | 1 | 0 | 0 | 1 | 4 |
| hsa-miR-708 | C10orf4   | 1 | 1 | 1 | 1 | 0 | 0 | 1 | 0 | 0 | 1 | 6 |
| hsa-miR-708 | C10orf46  | 1 | 1 | 0 | 1 | 0 | 0 | 1 | 0 | 0 | 0 | 4 |
| hsa-miR-708 | C10orf54  | 1 | 1 | 0 | 0 | 0 | 0 | 1 | 0 | 0 | 1 | 4 |
| hsa-miR-708 | C10orf56  | 1 | 1 | 0 | 1 | 0 | 0 | 1 | 0 | 0 | 0 | 4 |
| hsa-miR-708 | C10orf57  | 1 | 1 | 0 | 1 | 0 | 0 | 1 | 0 | 0 | 0 | 4 |
| hsa-miR-708 | C11orf56  | 1 | 1 | 0 | 1 | 0 | 0 | 1 | 0 | 0 | 0 | 4 |
| hsa-miR-708 | C11orf61  | 1 | 1 | 0 | 1 | 0 | 0 | 1 | 0 | 0 | 1 | 5 |
| hsa-miR-708 | C11orf79  | 1 | 1 | 0 | 1 | 0 | 0 | 1 | 0 | 0 | 0 | 4 |
| hsa-miR-708 | C12orf29  | 1 | 1 | 1 | 1 | 0 | 0 | 1 | 0 | 0 | 1 | 6 |
| hsa-miR-708 | C12orf53  | 1 | 1 | 0 | 1 | 0 | 0 | 1 | 0 | 0 | 1 | 5 |
| hsa-miR-708 | C13orf23  | 1 | 1 | 0 | 1 | 0 | 0 | 1 | 0 | 0 | 1 | 5 |
| hsa-miR-708 | C13orf30  | 1 | 1 | 0 | 1 | 0 | 0 | 1 | 0 | 0 | 1 | 5 |
| hsa-miR-708 | C14orf1   | 1 | 1 | 0 | 0 | 0 | 0 | 1 | 0 | 0 | 1 | 4 |
| hsa-miR-708 | C14orf101 | 1 | 1 | 0 | 1 | 0 | 0 | 1 | 0 | 0 | 1 | 5 |
| hsa-miR-708 | C14orf105 | 1 | 1 | 1 | 1 | 0 | 0 | 1 | 0 | 0 | 1 | 6 |
| hsa-miR-708 | C14orf108 | 1 | 1 | 1 | 1 | 0 | 0 | 1 | 0 | 0 | 1 | 6 |
| hsa-miR-708 | C14orf124 | 1 | 1 | 0 | 1 | 0 | 0 | 1 | 0 | 0 | 1 | 5 |
| hsa-miR-708 | C14orf130 | 1 | 1 | 0 | 1 | 0 | 0 | 1 | 0 | 0 | 1 | 5 |
| hsa-miR-708 | C14orf28  | 1 | 1 | 0 | 1 | 0 | 0 | 1 | 0 | 0 | 1 | 5 |
| hsa-miR-708 | C14orf4   | 0 | 1 | 0 | 1 | 0 | 0 | 1 | 0 | 0 | 1 | 4 |
| hsa-miR-708 | C14orf43  | 1 | 1 | 0 | 1 | 0 | 0 | 0 | 0 | 0 | 1 | 4 |
| hsa-miR-708 | C14orf83  | 1 | 1 | 0 | 1 | 0 | 0 | 1 | 0 | 0 | 1 | 5 |
| hsa-miR-708 | C15orf15  | 1 | 1 | 1 | 1 | 0 | 0 | 1 | 0 | 0 | 1 | 6 |
| hsa-miR-708 | C15orf17  | 1 | 1 | 0 | 1 | 0 | 0 | 1 | 0 | 0 | 1 | 5 |
| hsa-miR-708 | C15orf2   | 1 | 1 | 0 | 1 | 0 | 0 | 1 | 0 | 0 | 1 | 5 |
| hsa-miR-708 | C15orf52  | 1 | 1 | 0 | 1 | 0 | 0 | 1 | 0 | 0 | 1 | 5 |

|             |           |   |   |   |   |   |   |   |   |   |   |   |
|-------------|-----------|---|---|---|---|---|---|---|---|---|---|---|
| hsa-miR-708 | C16orf63  | 1 | 1 | 0 | 1 | 0 | 0 | 1 | 0 | 0 | 1 | 5 |
| hsa-miR-708 | C16orf72  | 1 | 1 | 0 | 1 | 0 | 0 | 1 | 0 | 0 | 1 | 5 |
| hsa-miR-708 | C16orf77  | 1 | 1 | 0 | 1 | 0 | 0 | 1 | 0 | 0 | 1 | 5 |
| hsa-miR-708 | C16orf78  | 1 | 1 | 0 | 1 | 0 | 0 | 1 | 0 | 0 | 1 | 5 |
| hsa-miR-708 | C17orf37  | 1 | 1 | 0 | 1 | 0 | 0 | 1 | 0 | 0 | 1 | 5 |
| hsa-miR-708 | C17orf56  | 1 | 1 | 0 | 1 | 0 | 0 | 1 | 0 | 0 | 0 | 4 |
| hsa-miR-708 | C17orf78  | 1 | 1 | 0 | 1 | 0 | 0 | 1 | 0 | 0 | 1 | 5 |
| hsa-miR-708 | C18orf1   | 1 | 0 | 0 | 1 | 0 | 0 | 1 | 0 | 0 | 1 | 4 |
| hsa-miR-708 | C18orf24  | 1 | 1 | 1 | 1 | 0 | 0 | 1 | 0 | 0 | 1 | 6 |
| hsa-miR-708 | C18orf25  | 1 | 1 | 0 | 1 | 0 | 0 | 1 | 0 | 0 | 1 | 5 |
| hsa-miR-708 | C19orf12  | 1 | 1 | 0 | 1 | 0 | 0 | 0 | 0 | 0 | 1 | 4 |
| hsa-miR-708 | C19orf21  | 1 | 1 | 0 | 1 | 0 | 0 | 1 | 0 | 0 | 1 | 5 |
| hsa-miR-708 | C19orf22  | 1 | 1 | 0 | 1 | 0 | 0 | 1 | 0 | 0 | 1 | 5 |
| hsa-miR-708 | C19orf25  | 1 | 1 | 0 | 1 | 0 | 0 | 1 | 0 | 0 | 1 | 5 |
| hsa-miR-708 | C19orf34  | 0 | 1 | 0 | 1 | 0 | 0 | 1 | 0 | 0 | 1 | 4 |
| hsa-miR-708 | C19orf47  | 1 | 1 | 0 | 1 | 0 | 0 | 1 | 0 | 0 | 1 | 5 |
| hsa-miR-708 | C19orf50  | 1 | 1 | 0 | 1 | 0 | 0 | 1 | 0 | 0 | 1 | 5 |
| hsa-miR-708 | C19orf60  | 1 | 0 | 0 | 1 | 0 | 0 | 1 | 0 | 0 | 1 | 4 |
| hsa-miR-708 | C1orf107  | 1 | 1 | 0 | 0 | 0 | 0 | 1 | 0 | 0 | 1 | 4 |
| hsa-miR-708 | C1orf113  | 1 | 0 | 0 | 1 | 0 | 0 | 1 | 0 | 0 | 1 | 4 |
| hsa-miR-708 | C1orf115  | 1 | 1 | 0 | 1 | 0 | 0 | 1 | 0 | 0 | 1 | 5 |
| hsa-miR-708 | C1orf119  | 0 | 1 | 1 | 1 | 0 | 0 | 0 | 0 | 0 | 1 | 4 |
| hsa-miR-708 | C1orf128  | 1 | 1 | 0 | 1 | 0 | 0 | 1 | 0 | 0 | 0 | 4 |
| hsa-miR-708 | C1orf144  | 1 | 1 | 0 | 1 | 0 | 0 | 0 | 0 | 0 | 1 | 4 |
| hsa-miR-708 | C1orf159  | 1 | 1 | 0 | 1 | 0 | 0 | 1 | 0 | 0 | 0 | 4 |
| hsa-miR-708 | C1orf161  | 1 | 1 | 0 | 1 | 0 | 0 | 1 | 0 | 0 | 0 | 4 |
| hsa-miR-708 | C1orf163  | 1 | 1 | 0 | 1 | 0 | 0 | 1 | 0 | 0 | 1 | 5 |
| hsa-miR-708 | C1orf177  | 1 | 1 | 0 | 1 | 0 | 0 | 1 | 0 | 0 | 0 | 4 |
| hsa-miR-708 | C1orf201  | 1 | 1 | 0 | 1 | 0 | 0 | 1 | 0 | 0 | 0 | 4 |
| hsa-miR-708 | C1orf212  | 0 | 1 | 0 | 1 | 0 | 0 | 1 | 0 | 0 | 1 | 4 |
| hsa-miR-708 | C1orf26   | 1 | 0 | 1 | 1 | 0 | 0 | 1 | 0 | 0 | 1 | 5 |
| hsa-miR-708 | C1orf27   | 1 | 1 | 1 | 1 | 0 | 0 | 1 | 0 | 0 | 1 | 6 |
| hsa-miR-708 | C1orf35   | 1 | 1 | 0 | 1 | 0 | 0 | 1 | 0 | 0 | 1 | 5 |
| hsa-miR-708 | C1orf61   | 1 | 1 | 0 | 1 | 0 | 0 | 1 | 0 | 0 | 1 | 5 |
| hsa-miR-708 | C1orf69   | 1 | 1 | 0 | 1 | 0 | 0 | 1 | 0 | 0 | 1 | 5 |
| hsa-miR-708 | C1orf90   | 1 | 1 | 0 | 1 | 0 | 0 | 1 | 0 | 0 | 1 | 5 |
| hsa-miR-708 | C1orf93   | 1 | 1 | 0 | 1 | 0 | 0 | 1 | 0 | 0 | 1 | 5 |
| hsa-miR-708 | C1orf95   | 0 | 1 | 0 | 1 | 0 | 0 | 1 | 0 | 0 | 1 | 4 |
| hsa-miR-708 | C1orf96   | 1 | 1 | 0 | 1 | 0 | 0 | 1 | 0 | 0 | 0 | 4 |
| hsa-miR-708 | C1QTNF1   | 1 | 1 | 0 | 1 | 0 | 0 | 1 | 0 | 0 | 1 | 5 |
| hsa-miR-708 | C1QTNF6   | 1 | 1 | 0 | 1 | 0 | 0 | 0 | 0 | 0 | 1 | 4 |
| hsa-miR-708 | C1RL      | 1 | 1 | 0 | 1 | 0 | 0 | 1 | 0 | 0 | 1 | 5 |
| hsa-miR-708 | C20orf11  | 1 | 1 | 0 | 1 | 0 | 0 | 1 | 0 | 0 | 1 | 5 |
| hsa-miR-708 | C20orf118 | 1 | 1 | 0 | 1 | 0 | 0 | 1 | 0 | 0 | 0 | 4 |

|             |           |   |   |   |   |   |   |   |   |   |   |   |
|-------------|-----------|---|---|---|---|---|---|---|---|---|---|---|
| hsa-miR-708 | C20orf121 | 1 | 1 | 0 | 1 | 0 | 0 | 0 | 0 | 0 | 1 | 4 |
| hsa-miR-708 | C20orf29  | 1 | 1 | 0 | 1 | 0 | 0 | 1 | 0 | 0 | 1 | 5 |
| hsa-miR-708 | C20orf3   | 1 | 1 | 0 | 1 | 0 | 0 | 1 | 0 | 0 | 1 | 5 |
| hsa-miR-708 | C20orf4   | 1 | 1 | 0 | 1 | 0 | 0 | 1 | 0 | 0 | 1 | 5 |
| hsa-miR-708 | C20orf59  | 1 | 1 | 0 | 1 | 0 | 0 | 1 | 0 | 0 | 1 | 5 |
| hsa-miR-708 | C20orf82  | 1 | 1 | 0 | 1 | 0 | 0 | 1 | 0 | 0 | 1 | 5 |
| hsa-miR-708 | C21orf29  | 1 | 1 | 0 | 1 | 0 | 0 | 1 | 0 | 0 | 0 | 4 |
| hsa-miR-708 | C22orf25  | 1 | 1 | 0 | 1 | 0 | 0 | 1 | 0 | 0 | 1 | 5 |
| hsa-miR-708 | C22orf29  | 1 | 1 | 0 | 1 | 0 | 0 | 1 | 0 | 0 | 1 | 5 |
| hsa-miR-708 | C22orf9   | 1 | 1 | 0 | 1 | 0 | 0 | 1 | 0 | 0 | 1 | 5 |
| hsa-miR-708 | C2orf18   | 1 | 1 | 0 | 1 | 0 | 0 | 1 | 0 | 0 | 1 | 5 |
| hsa-miR-708 | C2orf43   | 1 | 1 | 0 | 1 | 0 | 0 | 1 | 0 | 0 | 0 | 4 |
| hsa-miR-708 | C2orf60   | 1 | 1 | 0 | 1 | 0 | 0 | 1 | 0 | 0 | 1 | 5 |
| hsa-miR-708 | C3orf10   | 0 | 1 | 0 | 1 | 0 | 0 | 1 | 0 | 0 | 1 | 4 |
| hsa-miR-708 | C3orf17   | 1 | 1 | 1 | 1 | 0 | 0 | 1 | 0 | 0 | 1 | 6 |
| hsa-miR-708 | C3orf32   | 1 | 1 | 0 | 1 | 0 | 0 | 1 | 0 | 0 | 1 | 5 |
| hsa-miR-708 | C3orf52   | 1 | 1 | 0 | 1 | 0 | 0 | 1 | 0 | 0 | 1 | 5 |
| hsa-miR-708 | C3orf57   | 1 | 1 | 0 | 1 | 0 | 0 | 1 | 0 | 0 | 1 | 5 |
| hsa-miR-708 | C3orf62   | 1 | 1 | 0 | 1 | 0 | 0 | 1 | 0 | 0 | 0 | 4 |
| hsa-miR-708 | C5orf36   | 1 | 1 | 1 | 1 | 0 | 0 | 1 | 0 | 0 | 1 | 6 |
| hsa-miR-708 | C5orf4    | 0 | 1 | 0 | 1 | 0 | 0 | 1 | 0 | 0 | 1 | 4 |
| hsa-miR-708 | C6orf106  | 1 | 1 | 0 | 1 | 0 | 0 | 1 | 0 | 0 | 1 | 5 |
| hsa-miR-708 | C6orf151  | 1 | 1 | 0 | 1 | 0 | 0 | 1 | 0 | 0 | 1 | 5 |
| hsa-miR-708 | C6orf154  | 1 | 1 | 0 | 1 | 0 | 0 | 1 | 0 | 0 | 1 | 5 |
| hsa-miR-708 | C6orf223  | 1 | 1 | 0 | 1 | 0 | 0 | 1 | 0 | 0 | 1 | 5 |
| hsa-miR-708 | C6orf89   | 1 | 1 | 0 | 1 | 0 | 0 | 1 | 0 | 0 | 1 | 5 |
| hsa-miR-708 | C7orf20   | 0 | 1 | 0 | 1 | 0 | 0 | 1 | 0 | 0 | 1 | 4 |
| hsa-miR-708 | C7orf42   | 0 | 1 | 0 | 1 | 0 | 0 | 1 | 0 | 0 | 1 | 4 |
| hsa-miR-708 | C7orf50   | 1 | 1 | 0 | 1 | 0 | 0 | 0 | 0 | 0 | 1 | 4 |
| hsa-miR-708 | C7orf53   | 1 | 0 | 1 | 1 | 0 | 0 | 1 | 0 | 0 | 1 | 5 |
| hsa-miR-708 | C8orf40   | 1 | 0 | 0 | 1 | 0 | 0 | 1 | 0 | 0 | 1 | 4 |
| hsa-miR-708 | C8orf46   | 1 | 1 | 0 | 1 | 0 | 0 | 1 | 0 | 0 | 1 | 5 |
| hsa-miR-708 | C9orf100  | 1 | 1 | 0 | 1 | 0 | 0 | 1 | 0 | 0 | 1 | 5 |
| hsa-miR-708 | C9orf163  | 1 | 1 | 0 | 1 | 0 | 0 | 1 | 0 | 0 | 1 | 5 |
| hsa-miR-708 | C9orf19   | 1 | 1 | 0 | 1 | 0 | 0 | 1 | 0 | 0 | 1 | 5 |
| hsa-miR-708 | C9orf25   | 1 | 1 | 0 | 1 | 0 | 0 | 1 | 0 | 0 | 1 | 5 |
| hsa-miR-708 | C9orf3    | 1 | 1 | 0 | 1 | 0 | 0 | 1 | 0 | 0 | 1 | 5 |
| hsa-miR-708 | C9orf58   | 1 | 1 | 0 | 1 | 0 | 0 | 1 | 0 | 0 | 0 | 4 |
| hsa-miR-708 | C9orf7    | 1 | 1 | 0 | 1 | 0 | 0 | 1 | 0 | 0 | 1 | 5 |
| hsa-miR-708 | C9orf91   | 0 | 1 | 0 | 1 | 0 | 0 | 1 | 0 | 0 | 1 | 4 |
| hsa-miR-708 | CA13      | 1 | 1 | 0 | 1 | 0 | 0 | 1 | 0 | 0 | 1 | 5 |
| hsa-miR-708 | CA3       | 1 | 1 | 0 | 1 | 0 | 0 | 1 | 0 | 0 | 0 | 4 |
| hsa-miR-708 | CAB39L    | 1 | 1 | 0 | 1 | 0 | 0 | 1 | 0 | 0 | 1 | 5 |
| hsa-miR-708 | CABC1     | 1 | 1 | 0 | 1 | 0 | 0 | 1 | 0 | 0 | 0 | 4 |

|             |          |   |   |   |   |   |   |   |   |   |   |   |
|-------------|----------|---|---|---|---|---|---|---|---|---|---|---|
| hsa-miR-708 | CABLES2  | 1 | 1 | 0 | 1 | 0 | 0 | 1 | 0 | 0 | 1 | 5 |
| hsa-miR-708 | CABP7    | 1 | 1 | 0 | 0 | 0 | 0 | 1 | 0 | 0 | 1 | 4 |
| hsa-miR-708 | CACNA1C  | 1 | 1 | 0 | 1 | 0 | 0 | 0 | 0 | 0 | 1 | 4 |
| hsa-miR-708 | CACNA1E  | 1 | 1 | 0 | 1 | 0 | 0 | 1 | 0 | 0 | 0 | 4 |
| hsa-miR-708 | CACNA1G  | 1 | 1 | 0 | 1 | 0 | 0 | 0 | 0 | 0 | 1 | 4 |
| hsa-miR-708 | CACNA1I  | 1 | 1 | 0 | 1 | 0 | 0 | 0 | 0 | 0 | 1 | 4 |
| hsa-miR-708 | CACNB1   | 1 | 1 | 0 | 1 | 0 | 0 | 1 | 0 | 0 | 0 | 4 |
| hsa-miR-708 | CACNG7   | 1 | 1 | 0 | 1 | 0 | 0 | 1 | 0 | 0 | 1 | 5 |
| hsa-miR-708 | CALB2    | 1 | 1 | 0 | 1 | 0 | 0 | 1 | 0 | 0 | 1 | 5 |
| hsa-miR-708 | CALCOCO2 | 1 | 1 | 0 | 1 | 0 | 0 | 1 | 0 | 0 | 1 | 5 |
| hsa-miR-708 | CALCR    | 1 | 1 | 0 | 1 | 0 | 0 | 1 | 0 | 0 | 0 | 4 |
| hsa-miR-708 | CALD1    | 1 | 1 | 0 | 1 | 0 | 0 | 1 | 0 | 0 | 1 | 5 |
| hsa-miR-708 | CALN1    | 1 | 0 | 0 | 1 | 0 | 0 | 1 | 0 | 0 | 1 | 4 |
| hsa-miR-708 | CALY     | 0 | 1 | 0 | 1 | 0 | 0 | 1 | 0 | 0 | 1 | 4 |
| hsa-miR-708 | CAMK2G   | 1 | 1 | 0 | 1 | 0 | 0 | 1 | 0 | 0 | 1 | 5 |
| hsa-miR-708 | CAMTA2   | 1 | 1 | 0 | 1 | 0 | 0 | 1 | 0 | 0 | 1 | 5 |
| hsa-miR-708 | CANT1    | 1 | 0 | 0 | 1 | 0 | 0 | 1 | 0 | 0 | 1 | 4 |
| hsa-miR-708 | CAPN1    | 1 | 1 | 0 | 1 | 0 | 0 | 1 | 0 | 0 | 0 | 4 |
| hsa-miR-708 | CAPN6    | 1 | 1 | 0 | 1 | 0 | 0 | 1 | 0 | 0 | 1 | 5 |
| hsa-miR-708 | CAPRN1   | 1 | 1 | 0 | 1 | 0 | 0 | 1 | 0 | 0 | 1 | 5 |
| hsa-miR-708 | CARD14   | 1 | 1 | 0 | 1 | 0 | 0 | 1 | 0 | 0 | 0 | 4 |
| hsa-miR-708 | CASC3    | 1 | 1 | 0 | 1 | 0 | 0 | 1 | 0 | 0 | 1 | 5 |
| hsa-miR-708 | CASKIN1  | 1 | 1 | 0 | 0 | 0 | 0 | 1 | 0 | 0 | 1 | 4 |
| hsa-miR-708 | CASKIN2  | 1 | 1 | 0 | 0 | 0 | 0 | 1 | 0 | 0 | 1 | 4 |
| hsa-miR-708 | CASP2    | 1 | 1 | 1 | 1 | 0 | 0 | 1 | 0 | 0 | 1 | 6 |
| hsa-miR-708 | CASQ2    | 1 | 1 | 0 | 1 | 0 | 0 | 1 | 0 | 0 | 1 | 5 |
| hsa-miR-708 | CBFA2T2  | 1 | 0 | 0 | 1 | 0 | 0 | 1 | 0 | 0 | 1 | 4 |
| hsa-miR-708 | CBFB     | 1 | 1 | 1 | 1 | 0 | 0 | 1 | 0 | 0 | 1 | 6 |
| hsa-miR-708 | CBL      | 1 | 1 | 0 | 1 | 0 | 0 | 1 | 0 | 0 | 1 | 5 |
| hsa-miR-708 | CBLN2    | 1 | 1 | 0 | 1 | 0 | 0 | 1 | 0 | 0 | 1 | 5 |
| hsa-miR-708 | CBX2     | 1 | 1 | 0 | 1 | 0 | 0 | 1 | 0 | 0 | 1 | 5 |
| hsa-miR-708 | CBX7     | 1 | 1 | 0 | 1 | 0 | 0 | 1 | 0 | 0 | 1 | 5 |
| hsa-miR-708 | CCBE1    | 1 | 1 | 0 | 1 | 0 | 0 | 1 | 0 | 0 | 1 | 5 |
| hsa-miR-708 | CCDC109A | 1 | 1 | 0 | 1 | 0 | 0 | 1 | 0 | 0 | 1 | 5 |
| hsa-miR-708 | CCDC113  | 1 | 1 | 1 | 1 | 0 | 0 | 1 | 0 | 0 | 1 | 6 |
| hsa-miR-708 | CCDC114  | 1 | 1 | 0 | 1 | 0 | 0 | 1 | 0 | 0 | 1 | 5 |
| hsa-miR-708 | CCDC117  | 1 | 1 | 0 | 1 | 0 | 0 | 1 | 0 | 0 | 1 | 5 |
| hsa-miR-708 | CCDC12   | 1 | 1 | 0 | 1 | 0 | 0 | 1 | 0 | 0 | 1 | 5 |
| hsa-miR-708 | CCDC121  | 1 | 0 | 0 | 1 | 0 | 0 | 1 | 0 | 0 | 1 | 4 |
| hsa-miR-708 | CCDC149  | 0 | 1 | 0 | 1 | 0 | 0 | 1 | 0 | 0 | 1 | 4 |
| hsa-miR-708 | CCDC25   | 1 | 1 | 0 | 1 | 0 | 0 | 1 | 0 | 0 | 1 | 5 |
| hsa-miR-708 | CCDC32   | 1 | 1 | 0 | 1 | 0 | 0 | 1 | 0 | 0 | 0 | 4 |
| hsa-miR-708 | CCDC4    | 1 | 1 | 0 | 1 | 0 | 0 | 1 | 0 | 0 | 1 | 5 |
| hsa-miR-708 | CCDC43   | 1 | 1 | 0 | 1 | 0 | 0 | 1 | 0 | 0 | 0 | 4 |

|             |          |   |   |   |   |   |   |   |   |   |   |   |
|-------------|----------|---|---|---|---|---|---|---|---|---|---|---|
| hsa-miR-708 | CCDC6    | 1 | 1 | 0 | 1 | 0 | 0 | 1 | 0 | 0 | 1 | 5 |
| hsa-miR-708 | CCDC69   | 1 | 1 | 0 | 1 | 0 | 0 | 1 | 0 | 0 | 1 | 5 |
| hsa-miR-708 | CCDC78   | 1 | 1 | 0 | 1 | 0 | 0 | 0 | 0 | 0 | 1 | 4 |
| hsa-miR-708 | CCDC92   | 1 | 1 | 0 | 1 | 0 | 0 | 1 | 0 | 0 | 1 | 5 |
| hsa-miR-708 | CCDC93   | 1 | 1 | 0 | 1 | 0 | 0 | 1 | 0 | 0 | 1 | 5 |
| hsa-miR-708 | CCL19    | 1 | 1 | 0 | 1 | 0 | 0 | 1 | 0 | 0 | 1 | 5 |
| hsa-miR-708 | CCL5     | 1 | 1 | 0 | 1 | 0 | 0 | 1 | 0 | 0 | 0 | 4 |
| hsa-miR-708 | CCND2    | 1 | 1 | 0 | 1 | 0 | 0 | 1 | 0 | 0 | 1 | 5 |
| hsa-miR-708 | CCND3    | 1 | 1 | 0 | 1 | 0 | 0 | 1 | 0 | 0 | 1 | 5 |
| hsa-miR-708 | CCNE2    | 1 | 1 | 0 | 1 | 0 | 0 | 1 | 0 | 0 | 0 | 4 |
| hsa-miR-708 | CCNJL    | 1 | 1 | 0 | 1 | 0 | 0 | 1 | 0 | 0 | 0 | 4 |
| hsa-miR-708 | CCNL2    | 0 | 1 | 0 | 1 | 0 | 0 | 1 | 0 | 0 | 1 | 4 |
| hsa-miR-708 | CCR1     | 1 | 1 | 0 | 1 | 0 | 0 | 1 | 0 | 0 | 1 | 5 |
| hsa-miR-708 | CCRL2    | 1 | 1 | 0 | 1 | 0 | 0 | 0 | 0 | 0 | 1 | 4 |
| hsa-miR-708 | CD1A     | 1 | 1 | 0 | 1 | 0 | 0 | 1 | 0 | 0 | 1 | 5 |
| hsa-miR-708 | CD209    | 1 | 1 | 0 | 1 | 0 | 0 | 1 | 0 | 0 | 1 | 5 |
| hsa-miR-708 | CD276    | 1 | 1 | 0 | 1 | 0 | 0 | 1 | 0 | 0 | 1 | 5 |
| hsa-miR-708 | CD28     | 1 | 1 | 0 | 1 | 0 | 0 | 1 | 0 | 0 | 1 | 5 |
| hsa-miR-708 | CD2AP    | 1 | 1 | 0 | 1 | 0 | 0 | 1 | 0 | 0 | 1 | 5 |
| hsa-miR-708 | CD300LF  | 1 | 1 | 0 | 1 | 0 | 0 | 1 | 0 | 0 | 1 | 5 |
| hsa-miR-708 | CD300LG  | 1 | 1 | 0 | 1 | 0 | 0 | 1 | 0 | 0 | 0 | 4 |
| hsa-miR-708 | CD320    | 1 | 1 | 0 | 1 | 0 | 0 | 1 | 0 | 0 | 1 | 5 |
| hsa-miR-708 | CD33     | 1 | 1 | 0 | 1 | 0 | 0 | 1 | 0 | 0 | 1 | 5 |
| hsa-miR-708 | CD34     | 1 | 1 | 0 | 1 | 0 | 0 | 1 | 0 | 0 | 1 | 5 |
| hsa-miR-708 | CD38     | 1 | 1 | 0 | 1 | 0 | 0 | 1 | 0 | 0 | 1 | 5 |
| hsa-miR-708 | CD3G     | 1 | 1 | 0 | 1 | 0 | 0 | 1 | 0 | 0 | 1 | 5 |
| hsa-miR-708 | CD44     | 1 | 1 | 1 | 1 | 0 | 0 | 1 | 0 | 0 | 1 | 6 |
| hsa-miR-708 | CD47     | 1 | 1 | 0 | 1 | 0 | 0 | 1 | 0 | 0 | 1 | 5 |
| hsa-miR-708 | CD59     | 1 | 1 | 0 | 1 | 0 | 0 | 0 | 0 | 0 | 1 | 4 |
| hsa-miR-708 | CD97     | 1 | 1 | 0 | 0 | 0 | 0 | 1 | 0 | 0 | 1 | 4 |
| hsa-miR-708 | CD99L2   | 1 | 1 | 0 | 1 | 0 | 0 | 1 | 0 | 0 | 1 | 5 |
| hsa-miR-708 | CDC25B   | 1 | 1 | 0 | 1 | 0 | 0 | 1 | 0 | 0 | 0 | 4 |
| hsa-miR-708 | CDC34    | 1 | 1 | 0 | 1 | 0 | 0 | 1 | 0 | 0 | 0 | 4 |
| hsa-miR-708 | CDC40    | 1 | 1 | 0 | 1 | 0 | 0 | 1 | 0 | 0 | 0 | 4 |
| hsa-miR-708 | CDC42EP3 | 1 | 1 | 0 | 1 | 0 | 0 | 1 | 0 | 0 | 1 | 5 |
| hsa-miR-708 | CDC42EP4 | 1 | 1 | 0 | 1 | 0 | 0 | 1 | 0 | 0 | 1 | 5 |
| hsa-miR-708 | CDC42SE1 | 1 | 1 | 0 | 1 | 0 | 0 | 0 | 0 | 0 | 1 | 4 |
| hsa-miR-708 | CDC73    | 1 | 1 | 1 | 1 | 0 | 0 | 1 | 0 | 0 | 1 | 6 |
| hsa-miR-708 | CDCP1    | 1 | 1 | 0 | 1 | 0 | 0 | 1 | 0 | 0 | 1 | 5 |
| hsa-miR-708 | CDH18    | 1 | 1 | 0 | 1 | 0 | 0 | 1 | 0 | 0 | 1 | 5 |
| hsa-miR-708 | CDH5     | 1 | 1 | 0 | 1 | 0 | 0 | 1 | 0 | 0 | 1 | 5 |
| hsa-miR-708 | CDK5     | 1 | 1 | 0 | 1 | 0 | 0 | 1 | 0 | 0 | 0 | 4 |
| hsa-miR-708 | CDKN1A   | 1 | 1 | 0 | 1 | 0 | 0 | 0 | 0 | 0 | 1 | 4 |
| hsa-miR-708 | CDKN2B   | 1 | 1 | 0 | 1 | 0 | 0 | 1 | 0 | 0 | 1 | 5 |

|             |         |   |   |   |   |   |   |   |   |   |   |   |
|-------------|---------|---|---|---|---|---|---|---|---|---|---|---|
| hsa-miR-708 | CDON    | 1 | 1 | 0 | 0 | 0 | 0 | 1 | 0 | 0 | 1 | 4 |
| hsa-miR-708 | CDRT4   | 0 | 1 | 0 | 1 | 0 | 0 | 1 | 0 | 0 | 1 | 4 |
| hsa-miR-708 | CDSN    | 1 | 1 | 1 | 1 | 0 | 0 | 1 | 0 | 0 | 1 | 6 |
| hsa-miR-708 | CDX1    | 1 | 1 | 0 | 1 | 0 | 0 | 1 | 0 | 0 | 1 | 5 |
| hsa-miR-708 | CEACAM6 | 1 | 1 | 0 | 0 | 0 | 0 | 1 | 0 | 0 | 1 | 4 |
| hsa-miR-708 | CEACAM7 | 1 | 1 | 0 | 1 | 0 | 0 | 1 | 0 | 0 | 1 | 5 |
| hsa-miR-708 | CEBPA   | 0 | 1 | 0 | 1 | 0 | 0 | 1 | 0 | 0 | 1 | 4 |
| hsa-miR-708 | CEBPG   | 1 | 1 | 0 | 1 | 0 | 0 | 1 | 0 | 0 | 0 | 4 |
| hsa-miR-708 | CENPB   | 1 | 1 | 0 | 1 | 0 | 0 | 1 | 0 | 0 | 0 | 4 |
| hsa-miR-708 | CENPF   | 1 | 1 | 1 | 1 | 0 | 0 | 1 | 0 | 0 | 1 | 6 |
| hsa-miR-708 | CENPN   | 1 | 1 | 0 | 1 | 0 | 0 | 1 | 0 | 0 | 1 | 5 |
| hsa-miR-708 | CENTB2  | 1 | 1 | 0 | 1 | 0 | 0 | 1 | 0 | 0 | 1 | 5 |
| hsa-miR-708 | CENTD3  | 1 | 1 | 0 | 1 | 0 | 0 | 1 | 0 | 0 | 1 | 5 |
| hsa-miR-708 | CENTG2  | 1 | 1 | 0 | 1 | 0 | 0 | 1 | 0 | 0 | 0 | 4 |
| hsa-miR-708 | CFL2    | 1 | 1 | 0 | 1 | 0 | 0 | 1 | 0 | 0 | 0 | 4 |
| hsa-miR-708 | CGNL1   | 1 | 1 | 0 | 1 | 0 | 0 | 1 | 0 | 0 | 1 | 5 |
| hsa-miR-708 | CHAD    | 1 | 1 | 0 | 1 | 0 | 0 | 1 | 0 | 0 | 1 | 5 |
| hsa-miR-708 | CHCHD4  | 1 | 1 | 0 | 1 | 0 | 0 | 0 | 0 | 0 | 1 | 4 |
| hsa-miR-708 | CHD3    | 1 | 1 | 0 | 0 | 0 | 0 | 1 | 0 | 0 | 1 | 4 |
| hsa-miR-708 | CHD5    | 1 | 1 | 0 | 1 | 0 | 0 | 1 | 0 | 0 | 1 | 5 |
| hsa-miR-708 | CHERP   | 1 | 1 | 0 | 1 | 0 | 0 | 1 | 0 | 0 | 1 | 5 |
| hsa-miR-708 | CHKA    | 1 | 1 | 0 | 1 | 0 | 0 | 1 | 0 | 0 | 0 | 4 |
| hsa-miR-708 | CHL1    | 1 | 1 | 0 | 0 | 0 | 0 | 1 | 0 | 0 | 1 | 4 |
| hsa-miR-708 | CHMP1A  | 1 | 1 | 0 | 1 | 0 | 0 | 1 | 0 | 0 | 1 | 5 |
| hsa-miR-708 | CHRAC1  | 1 | 1 | 0 | 1 | 0 | 0 | 1 | 0 | 0 | 1 | 5 |
| hsa-miR-708 | CHRM2   | 0 | 0 | 1 | 1 | 0 | 0 | 1 | 0 | 0 | 1 | 4 |
| hsa-miR-708 | CHRNA10 | 1 | 1 | 0 | 1 | 0 | 0 | 1 | 0 | 0 | 1 | 5 |
| hsa-miR-708 | CHRNA4  | 1 | 1 | 0 | 1 | 0 | 0 | 1 | 0 | 0 | 1 | 5 |
| hsa-miR-708 | CHRNB2  | 1 | 1 | 1 | 1 | 0 | 0 | 1 | 0 | 0 | 1 | 6 |
| hsa-miR-708 | CHST6   | 1 | 1 | 0 | 1 | 0 | 0 | 1 | 0 | 0 | 1 | 5 |
| hsa-miR-708 | CHSY3   | 0 | 1 | 0 | 1 | 0 | 0 | 1 | 0 | 0 | 1 | 4 |
| hsa-miR-708 | CIDEC   | 1 | 1 | 0 | 1 | 0 | 0 | 1 | 0 | 0 | 1 | 5 |
| hsa-miR-708 | CINP    | 1 | 1 | 0 | 1 | 0 | 0 | 1 | 0 | 0 | 0 | 4 |
| hsa-miR-708 | CIT     | 1 | 1 | 0 | 1 | 0 | 0 | 1 | 0 | 0 | 1 | 5 |
| hsa-miR-708 | CKAP2   | 1 | 1 | 0 | 1 | 0 | 0 | 1 | 0 | 0 | 1 | 5 |
| hsa-miR-708 | CLCN6   | 1 | 1 | 0 | 1 | 0 | 0 | 1 | 0 | 0 | 1 | 5 |
| hsa-miR-708 | CLDN1   | 1 | 1 | 0 | 1 | 0 | 0 | 1 | 0 | 0 | 0 | 4 |
| hsa-miR-708 | CLDN19  | 1 | 1 | 0 | 1 | 0 | 0 | 0 | 0 | 0 | 1 | 4 |
| hsa-miR-708 | CLDN6   | 1 | 1 | 0 | 1 | 0 | 0 | 1 | 0 | 0 | 1 | 5 |
| hsa-miR-708 | CLEC2B  | 1 | 1 | 0 | 1 | 0 | 0 | 1 | 0 | 0 | 1 | 5 |
| hsa-miR-708 | CLEC5A  | 1 | 1 | 0 | 0 | 0 | 0 | 1 | 0 | 0 | 1 | 4 |
| hsa-miR-708 | CLIP3   | 1 | 1 | 0 | 1 | 0 | 0 | 1 | 0 | 0 | 1 | 5 |
| hsa-miR-708 | CLN6    | 1 | 1 | 0 | 1 | 0 | 0 | 1 | 0 | 0 | 1 | 5 |
| hsa-miR-708 | CLN8    | 1 | 1 | 0 | 1 | 0 | 0 | 1 | 0 | 0 | 1 | 5 |

|             |         |   |   |   |   |   |   |   |   |   |   |   |
|-------------|---------|---|---|---|---|---|---|---|---|---|---|---|
| hsa-miR-708 | CLNS1A  | 1 | 1 | 0 | 1 | 0 | 0 | 1 | 0 | 0 | 1 | 5 |
| hsa-miR-708 | CMIP    | 0 | 1 | 0 | 1 | 0 | 0 | 1 | 0 | 0 | 1 | 4 |
| hsa-miR-708 | CMTM4   | 1 | 1 | 0 | 1 | 0 | 0 | 1 | 0 | 0 | 1 | 5 |
| hsa-miR-708 | CMTM7   | 1 | 1 | 0 | 1 | 0 | 0 | 1 | 0 | 0 | 1 | 5 |
| hsa-miR-708 | CNGB1   | 1 | 1 | 0 | 1 | 0 | 0 | 1 | 0 | 0 | 1 | 5 |
| hsa-miR-708 | CNKSR1  | 0 | 1 | 0 | 1 | 0 | 0 | 1 | 0 | 0 | 1 | 4 |
| hsa-miR-708 | CNNM2   | 1 | 1 | 0 | 1 | 0 | 0 | 1 | 0 | 0 | 1 | 5 |
| hsa-miR-708 | CNNM3   | 1 | 1 | 0 | 1 | 0 | 0 | 1 | 0 | 0 | 1 | 5 |
| hsa-miR-708 | CNNM4   | 1 | 1 | 0 | 0 | 0 | 0 | 1 | 0 | 0 | 1 | 4 |
| hsa-miR-708 | CNOT6L  | 1 | 1 | 0 | 1 | 0 | 0 | 1 | 0 | 0 | 0 | 4 |
| hsa-miR-708 | CNP     | 1 | 1 | 0 | 1 | 0 | 0 | 1 | 0 | 0 | 1 | 5 |
| hsa-miR-708 | CNPY3   | 1 | 1 | 0 | 1 | 0 | 0 | 1 | 0 | 0 | 1 | 5 |
| hsa-miR-708 | CNPY4   | 1 | 1 | 0 | 1 | 0 | 0 | 1 | 0 | 0 | 1 | 5 |
| hsa-miR-708 | CNR1    | 1 | 1 | 0 | 1 | 0 | 0 | 1 | 0 | 0 | 1 | 5 |
| hsa-miR-708 | CNTFR   | 1 | 1 | 0 | 1 | 0 | 0 | 0 | 0 | 0 | 1 | 4 |
| hsa-miR-708 | CNTNAP1 | 1 | 1 | 0 | 1 | 0 | 0 | 1 | 0 | 0 | 1 | 5 |
| hsa-miR-708 | COBRA1  | 1 | 1 | 0 | 1 | 0 | 0 | 1 | 0 | 0 | 0 | 4 |
| hsa-miR-708 | COL17A1 | 1 | 1 | 0 | 1 | 0 | 0 | 1 | 0 | 0 | 1 | 5 |
| hsa-miR-708 | COL1A1  | 1 | 1 | 0 | 1 | 0 | 0 | 1 | 0 | 0 | 1 | 5 |
| hsa-miR-708 | COL6A1  | 1 | 1 | 0 | 1 | 0 | 0 | 1 | 0 | 0 | 1 | 5 |
| hsa-miR-708 | COL8A2  | 1 | 1 | 0 | 1 | 0 | 0 | 1 | 0 | 0 | 1 | 5 |
| hsa-miR-708 | COLQ    | 1 | 1 | 0 | 1 | 0 | 0 | 0 | 0 | 0 | 1 | 4 |
| hsa-miR-708 | COMMD6  | 1 | 1 | 0 | 1 | 0 | 0 | 1 | 0 | 0 | 0 | 4 |
| hsa-miR-708 | COMMD9  | 1 | 1 | 1 | 1 | 0 | 0 | 1 | 0 | 0 | 1 | 6 |
| hsa-miR-708 | COPG2   | 0 | 1 | 0 | 1 | 0 | 0 | 1 | 0 | 0 | 1 | 4 |
| hsa-miR-708 | CORO1B  | 1 | 1 | 0 | 1 | 0 | 0 | 1 | 0 | 0 | 1 | 5 |
| hsa-miR-708 | CORO1C  | 1 | 1 | 0 | 1 | 0 | 0 | 1 | 0 | 0 | 1 | 5 |
| hsa-miR-708 | COX19   | 0 | 1 | 0 | 1 | 0 | 0 | 1 | 0 | 0 | 1 | 4 |
| hsa-miR-708 | COX5B   | 1 | 1 | 0 | 1 | 0 | 0 | 1 | 0 | 0 | 0 | 4 |
| hsa-miR-708 | COX6B2  | 1 | 1 | 0 | 1 | 0 | 0 | 1 | 0 | 0 | 1 | 5 |
| hsa-miR-708 | CPD     | 1 | 1 | 0 | 1 | 0 | 0 | 1 | 0 | 0 | 1 | 5 |
| hsa-miR-708 | CPLX1   | 1 | 1 | 0 | 1 | 0 | 0 | 1 | 0 | 0 | 1 | 5 |
| hsa-miR-708 | CPNE5   | 1 | 1 | 0 | 0 | 0 | 0 | 1 | 0 | 0 | 1 | 4 |
| hsa-miR-708 | CPSF2   | 1 | 1 | 0 | 1 | 0 | 0 | 1 | 0 | 0 | 1 | 5 |
| hsa-miR-708 | CR1     | 1 | 1 | 0 | 1 | 0 | 0 | 1 | 0 | 0 | 1 | 5 |
| hsa-miR-708 | CRAT    | 1 | 1 | 0 | 1 | 0 | 0 | 1 | 0 | 0 | 1 | 5 |
| hsa-miR-708 | CREB1   | 1 | 1 | 0 | 1 | 0 | 0 | 1 | 0 | 0 | 1 | 5 |
| hsa-miR-708 | CREB3   | 1 | 1 | 0 | 0 | 0 | 0 | 1 | 0 | 0 | 1 | 4 |
| hsa-miR-708 | CREB3L2 | 1 | 1 | 0 | 1 | 0 | 0 | 1 | 0 | 0 | 1 | 5 |
| hsa-miR-708 | CREB5   | 1 | 1 | 0 | 1 | 0 | 0 | 1 | 0 | 0 | 1 | 5 |
| hsa-miR-708 | CREBL2  | 1 | 1 | 0 | 1 | 0 | 0 | 1 | 0 | 0 | 1 | 5 |
| hsa-miR-708 | CREG2   | 1 | 1 | 0 | 1 | 0 | 0 | 1 | 0 | 0 | 1 | 5 |
| hsa-miR-708 | CRHR1   | 1 | 1 | 0 | 1 | 0 | 0 | 1 | 0 | 0 | 0 | 4 |
| hsa-miR-708 | CRIM1   | 1 | 1 | 0 | 1 | 0 | 0 | 1 | 0 | 0 | 1 | 5 |



|             |          |   |   |   |   |   |   |   |   |   |   |   |
|-------------|----------|---|---|---|---|---|---|---|---|---|---|---|
| hsa-miR-708 | CROT     | 1 | 1 | 1 | 1 | 0 | 0 | 1 | 0 | 0 | 1 | 6 |
| hsa-miR-708 | CRTC3    | 1 | 1 | 0 | 1 | 0 | 0 | 1 | 0 | 0 | 1 | 5 |
| hsa-miR-708 | CSF1     | 1 | 1 | 0 | 1 | 0 | 0 | 1 | 0 | 0 | 1 | 5 |
| hsa-miR-708 | CSF3     | 1 | 1 | 0 | 1 | 0 | 0 | 0 | 0 | 0 | 1 | 4 |
| hsa-miR-708 | CSMD2    | 1 | 0 | 0 | 1 | 0 | 0 | 1 | 0 | 0 | 1 | 4 |
| hsa-miR-708 | CSNK1G1  | 1 | 1 | 0 | 1 | 0 | 0 | 1 | 0 | 0 | 1 | 5 |
| hsa-miR-708 | CSNK2A1  | 1 | 1 | 0 | 1 | 0 | 0 | 0 | 0 | 0 | 1 | 4 |
| hsa-miR-708 | CST7     | 1 | 1 | 0 | 1 | 0 | 0 | 1 | 0 | 0 | 0 | 4 |
| hsa-miR-708 | CTAG2    | 1 | 1 | 0 | 1 | 0 | 0 | 1 | 0 | 0 | 0 | 4 |
| hsa-miR-708 | CTCFL    | 1 | 1 | 0 | 1 | 0 | 0 | 1 | 0 | 0 | 0 | 4 |
| hsa-miR-708 | CTDSPL   | 1 | 1 | 0 | 1 | 0 | 0 | 1 | 0 | 0 | 1 | 5 |
| hsa-miR-708 | CTF8     | 1 | 0 | 0 | 1 | 0 | 0 | 1 | 0 | 0 | 1 | 4 |
| hsa-miR-708 | CTNNBIP1 | 1 | 1 | 0 | 1 | 0 | 0 | 0 | 0 | 0 | 1 | 4 |
| hsa-miR-708 | CTNS     | 1 | 1 | 0 | 1 | 0 | 0 | 1 | 0 | 0 | 0 | 4 |
| hsa-miR-708 | CTSC     | 0 | 1 | 0 | 1 | 0 | 0 | 1 | 0 | 0 | 1 | 4 |
| hsa-miR-708 | CTSS     | 1 | 1 | 0 | 1 | 0 | 0 | 1 | 0 | 0 | 0 | 4 |
| hsa-miR-708 | CUL4B    | 1 | 1 | 0 | 1 | 0 | 0 | 1 | 0 | 0 | 1 | 5 |
| hsa-miR-708 | CXADR    | 1 | 1 | 0 | 1 | 0 | 0 | 1 | 0 | 0 | 1 | 5 |
| hsa-miR-708 | CXCL12   | 1 | 1 | 0 | 1 | 0 | 0 | 1 | 0 | 0 | 1 | 5 |
| hsa-miR-708 | CXCL5    | 1 | 1 | 0 | 1 | 0 | 0 | 1 | 0 | 0 | 1 | 5 |
| hsa-miR-708 | CXCL9    | 1 | 1 | 0 | 1 | 0 | 0 | 1 | 0 | 0 | 1 | 5 |
| hsa-miR-708 | CXCR3    | 1 | 1 | 0 | 1 | 0 | 0 | 1 | 0 | 0 | 0 | 4 |
| hsa-miR-708 | CXCR5    | 1 | 1 | 0 | 1 | 0 | 0 | 0 | 0 | 0 | 1 | 4 |
| hsa-miR-708 | CXorf15  | 1 | 1 | 0 | 1 | 0 | 0 | 1 | 0 | 0 | 0 | 4 |
| hsa-miR-708 | CYB561   | 1 | 1 | 0 | 1 | 0 | 0 | 1 | 0 | 0 | 0 | 4 |
| hsa-miR-708 | CYB5D1   | 1 | 1 | 0 | 1 | 0 | 0 | 1 | 0 | 0 | 1 | 5 |
| hsa-miR-708 | CYBASC3  | 1 | 0 | 0 | 1 | 0 | 0 | 1 | 0 | 0 | 1 | 4 |
| hsa-miR-708 | CYBB     | 1 | 1 | 0 | 1 | 0 | 0 | 1 | 0 | 0 | 1 | 5 |
| hsa-miR-708 | CYP11B1  | 1 | 1 | 0 | 1 | 0 | 0 | 1 | 0 | 0 | 1 | 5 |
| hsa-miR-708 | CYP11B2  | 1 | 1 | 0 | 1 | 0 | 0 | 1 | 0 | 0 | 1 | 5 |
| hsa-miR-708 | CYP26B1  | 1 | 1 | 0 | 1 | 0 | 0 | 1 | 0 | 0 | 1 | 5 |
| hsa-miR-708 | CYP27C1  | 1 | 1 | 0 | 1 | 0 | 0 | 1 | 0 | 0 | 1 | 5 |
| hsa-miR-708 | CYP2B6   | 1 | 1 | 0 | 1 | 0 | 0 | 1 | 0 | 0 | 1 | 5 |
| hsa-miR-708 | CYP2U1   | 1 | 1 | 0 | 1 | 0 | 0 | 1 | 0 | 0 | 1 | 5 |
| hsa-miR-708 | CYP4F22  | 1 | 1 | 0 | 1 | 0 | 0 | 1 | 0 | 0 | 1 | 5 |
| hsa-miR-708 | CYP4V2   | 1 | 1 | 0 | 1 | 0 | 0 | 1 | 0 | 0 | 0 | 4 |
| hsa-miR-708 | CYP8B1   | 1 | 1 | 0 | 1 | 0 | 0 | 1 | 0 | 0 | 1 | 5 |
| hsa-miR-708 | D4S234E  | 1 | 0 | 1 | 1 | 0 | 0 | 1 | 0 | 0 | 1 | 5 |
| hsa-miR-708 | DAB2IP   | 1 | 1 | 0 | 1 | 0 | 0 | 1 | 0 | 0 | 1 | 5 |
| hsa-miR-708 | DAK      | 1 | 1 | 0 | 1 | 0 | 0 | 1 | 0 | 0 | 1 | 5 |
| hsa-miR-708 | DALRD3   | 1 | 1 | 0 | 1 | 0 | 0 | 0 | 0 | 0 | 1 | 4 |
| hsa-miR-708 | DAO      | 1 | 1 | 0 | 1 | 0 | 0 | 1 | 0 | 0 | 0 | 4 |
| hsa-miR-708 | DAP      | 1 | 1 | 1 | 1 | 0 | 0 | 1 | 0 | 0 | 1 | 6 |
| hsa-miR-708 | DBF4B    | 1 | 1 | 0 | 1 | 0 | 0 | 1 | 0 | 0 | 0 | 4 |

|             |         |   |   |   |   |   |   |   |   |   |   |   |
|-------------|---------|---|---|---|---|---|---|---|---|---|---|---|
| hsa-miR-708 | DBNDD1  | 1 | 0 | 0 | 1 | 0 | 0 | 1 | 0 | 0 | 1 | 4 |
| hsa-miR-708 | DBT     | 1 | 1 | 0 | 1 | 0 | 0 | 1 | 0 | 0 | 0 | 4 |
| hsa-miR-708 | DCHS1   | 1 | 1 | 0 | 1 | 0 | 0 | 1 | 0 | 0 | 1 | 5 |
| hsa-miR-708 | DCLK1   | 1 | 1 | 0 | 1 | 0 | 0 | 1 | 0 | 0 | 1 | 5 |
| hsa-miR-708 | DCLK3   | 1 | 1 | 0 | 1 | 0 | 0 | 1 | 0 | 0 | 1 | 5 |
| hsa-miR-708 | DCTD    | 1 | 1 | 0 | 1 | 0 | 0 | 1 | 0 | 0 | 1 | 5 |
| hsa-miR-708 | DCX     | 1 | 1 | 1 | 1 | 0 | 0 | 1 | 0 | 0 | 1 | 6 |
| hsa-miR-708 | DDAH1   | 1 | 1 | 0 | 1 | 0 | 0 | 0 | 0 | 0 | 1 | 4 |
| hsa-miR-708 | DDEF2   | 1 | 1 | 0 | 1 | 0 | 0 | 1 | 0 | 0 | 1 | 5 |
| hsa-miR-708 | DDN     | 1 | 1 | 0 | 1 | 0 | 0 | 1 | 0 | 0 | 0 | 4 |
| hsa-miR-708 | DDX18   | 1 | 1 | 0 | 1 | 0 | 0 | 1 | 0 | 0 | 1 | 5 |
| hsa-miR-708 | DDX21   | 1 | 1 | 0 | 1 | 0 | 0 | 1 | 0 | 0 | 1 | 5 |
| hsa-miR-708 | DDX28   | 1 | 1 | 0 | 1 | 0 | 0 | 1 | 0 | 0 | 0 | 4 |
| hsa-miR-708 | DDX4    | 1 | 0 | 0 | 1 | 0 | 0 | 1 | 0 | 0 | 1 | 4 |
| hsa-miR-708 | DDX56   | 1 | 1 | 0 | 1 | 0 | 0 | 1 | 0 | 0 | 1 | 5 |
| hsa-miR-708 | DDX60L  | 1 | 1 | 0 | 1 | 0 | 0 | 1 | 0 | 0 | 1 | 5 |
| hsa-miR-708 | DEDD    | 1 | 1 | 0 | 1 | 0 | 0 | 0 | 0 | 0 | 1 | 4 |
| hsa-miR-708 | DEPDC2  | 1 | 1 | 0 | 1 | 0 | 0 | 1 | 0 | 0 | 1 | 5 |
| hsa-miR-708 | DERL1   | 1 | 1 | 0 | 1 | 0 | 0 | 1 | 0 | 0 | 1 | 5 |
| hsa-miR-708 | DFFB    | 1 | 1 | 0 | 1 | 0 | 0 | 1 | 0 | 0 | 1 | 5 |
| hsa-miR-708 | DFNB31  | 1 | 1 | 0 | 1 | 0 | 0 | 1 | 0 | 0 | 1 | 5 |
| hsa-miR-708 | DGCR14  | 1 | 1 | 0 | 1 | 0 | 0 | 1 | 0 | 0 | 1 | 5 |
| hsa-miR-708 | DGCR8   | 1 | 1 | 0 | 1 | 0 | 0 | 1 | 0 | 0 | 0 | 4 |
| hsa-miR-708 | DGKQ    | 1 | 1 | 0 | 1 | 0 | 0 | 1 | 0 | 0 | 1 | 5 |
| hsa-miR-708 | DHRS2   | 1 | 1 | 0 | 1 | 0 | 0 | 1 | 0 | 0 | 1 | 5 |
| hsa-miR-708 | DHRS3   | 1 | 1 | 0 | 1 | 0 | 0 | 1 | 0 | 0 | 1 | 5 |
| hsa-miR-708 | DHRS7B  | 1 | 1 | 0 | 1 | 0 | 0 | 1 | 0 | 0 | 1 | 5 |
| hsa-miR-708 | DHX16   | 1 | 1 | 0 | 1 | 0 | 0 | 0 | 0 | 0 | 1 | 4 |
| hsa-miR-708 | DHX33   | 1 | 1 | 0 | 1 | 0 | 0 | 1 | 0 | 0 | 1 | 5 |
| hsa-miR-708 | DHX35   | 1 | 1 | 0 | 1 | 0 | 0 | 1 | 0 | 0 | 1 | 5 |
| hsa-miR-708 | DHX40   | 1 | 1 | 0 | 1 | 0 | 0 | 1 | 0 | 0 | 0 | 4 |
| hsa-miR-708 | DIAPH1  | 1 | 1 | 0 | 1 | 0 | 0 | 1 | 0 | 0 | 1 | 5 |
| hsa-miR-708 | DIP2B   | 1 | 1 | 0 | 1 | 0 | 0 | 1 | 0 | 0 | 1 | 5 |
| hsa-miR-708 | DIP2C   | 1 | 1 | 0 | 1 | 0 | 0 | 1 | 0 | 0 | 1 | 5 |
| hsa-miR-708 | DIXDC1  | 1 | 0 | 0 | 1 | 0 | 0 | 1 | 0 | 0 | 1 | 4 |
| hsa-miR-708 | DKK3    | 1 | 1 | 0 | 1 | 0 | 0 | 1 | 0 | 0 | 1 | 5 |
| hsa-miR-708 | DLG3    | 1 | 1 | 0 | 1 | 0 | 0 | 1 | 0 | 0 | 0 | 4 |
| hsa-miR-708 | DLGAP2  | 1 | 1 | 0 | 1 | 0 | 0 | 1 | 0 | 0 | 1 | 5 |
| hsa-miR-708 | DLL4    | 1 | 1 | 0 | 1 | 0 | 0 | 1 | 0 | 0 | 1 | 5 |
| hsa-miR-708 | DMKN    | 0 | 1 | 0 | 1 | 0 | 0 | 1 | 0 | 0 | 1 | 4 |
| hsa-miR-708 | DNAJA4  | 1 | 1 | 0 | 0 | 0 | 0 | 1 | 0 | 0 | 1 | 4 |
| hsa-miR-708 | DNAJB14 | 1 | 1 | 0 | 1 | 0 | 0 | 0 | 0 | 0 | 1 | 4 |
| hsa-miR-708 | DNAJB5  | 1 | 0 | 0 | 1 | 0 | 0 | 1 | 0 | 0 | 1 | 4 |
| hsa-miR-708 | DNAJC16 | 1 | 1 | 0 | 1 | 0 | 0 | 1 | 0 | 0 | 1 | 5 |

|             |         |   |   |   |   |   |   |   |   |   |   |   |
|-------------|---------|---|---|---|---|---|---|---|---|---|---|---|
| hsa-miR-708 | DNAJC8  | 1 | 1 | 0 | 1 | 0 | 0 | 1 | 0 | 0 | 1 | 5 |
| hsa-miR-708 | DNAL1   | 0 | 1 | 0 | 1 | 0 | 0 | 1 | 0 | 0 | 1 | 4 |
| hsa-miR-708 | DNASE2  | 1 | 1 | 0 | 1 | 0 | 0 | 1 | 0 | 0 | 1 | 5 |
| hsa-miR-708 | DNM3    | 0 | 1 | 1 | 1 | 0 | 0 | 1 | 0 | 0 | 1 | 5 |
| hsa-miR-708 | DNMBP   | 1 | 1 | 0 | 1 | 0 | 0 | 1 | 0 | 0 | 1 | 5 |
| hsa-miR-708 | DOCK1   | 1 | 1 | 0 | 1 | 0 | 0 | 1 | 0 | 0 | 1 | 5 |
| hsa-miR-708 | DOCK3   | 1 | 1 | 0 | 1 | 0 | 0 | 1 | 0 | 0 | 1 | 5 |
| hsa-miR-708 | DOCK4   | 1 | 1 | 0 | 1 | 0 | 0 | 1 | 0 | 0 | 1 | 5 |
| hsa-miR-708 | DOK4    | 1 | 1 | 0 | 1 | 0 | 0 | 1 | 0 | 0 | 0 | 4 |
| hsa-miR-708 | DPF1    | 1 | 0 | 0 | 1 | 0 | 0 | 1 | 0 | 0 | 1 | 4 |
| hsa-miR-708 | DPY19L1 | 1 | 0 | 0 | 1 | 0 | 0 | 1 | 0 | 0 | 1 | 4 |
| hsa-miR-708 | DPYSL2  | 1 | 1 | 0 | 1 | 0 | 0 | 1 | 0 | 0 | 1 | 5 |
| hsa-miR-708 | DRAM    | 1 | 1 | 0 | 1 | 0 | 0 | 1 | 0 | 0 | 1 | 5 |
| hsa-miR-708 | DSCR6   | 1 | 1 | 0 | 1 | 0 | 0 | 1 | 0 | 0 | 1 | 5 |
| hsa-miR-708 | DSEL    | 1 | 1 | 0 | 0 | 0 | 0 | 1 | 0 | 0 | 1 | 4 |
| hsa-miR-708 | DSG3    | 1 | 1 | 0 | 1 | 0 | 0 | 1 | 0 | 0 | 1 | 5 |
| hsa-miR-708 | DTNA    | 1 | 1 | 0 | 1 | 0 | 0 | 0 | 0 | 0 | 1 | 4 |
| hsa-miR-708 | DTNBP1  | 1 | 0 | 0 | 1 | 0 | 0 | 1 | 0 | 0 | 1 | 4 |
| hsa-miR-708 | DUOX2   | 1 | 1 | 0 | 1 | 0 | 0 | 1 | 0 | 0 | 1 | 5 |
| hsa-miR-708 | DUSP1   | 1 | 1 | 0 | 1 | 0 | 0 | 1 | 0 | 0 | 0 | 4 |
| hsa-miR-708 | DUSP3   | 1 | 1 | 0 | 1 | 0 | 0 | 1 | 0 | 0 | 1 | 5 |
| hsa-miR-708 | DUSP4   | 1 | 1 | 0 | 1 | 0 | 0 | 0 | 0 | 0 | 1 | 4 |
| hsa-miR-708 | DVL1    | 1 | 1 | 0 | 1 | 0 | 0 | 1 | 0 | 0 | 1 | 5 |
| hsa-miR-708 | DYNC1I1 | 1 | 1 | 0 | 1 | 0 | 0 | 1 | 0 | 0 | 0 | 4 |
| hsa-miR-708 | DYNC1L2 | 1 | 1 | 1 | 1 | 0 | 0 | 1 | 0 | 0 | 1 | 6 |
| hsa-miR-708 | DYSF    | 1 | 1 | 0 | 1 | 0 | 0 | 0 | 0 | 0 | 1 | 4 |
| hsa-miR-708 | E2F4    | 1 | 1 | 0 | 1 | 0 | 0 | 1 | 0 | 0 | 1 | 5 |
| hsa-miR-708 | EAF1    | 1 | 1 | 0 | 1 | 0 | 0 | 1 | 0 | 0 | 1 | 5 |
| hsa-miR-708 | ECE2    | 0 | 1 | 0 | 1 | 0 | 0 | 1 | 0 | 0 | 1 | 4 |
| hsa-miR-708 | ECHDC3  | 1 | 1 | 0 | 1 | 0 | 0 | 1 | 0 | 0 | 0 | 4 |
| hsa-miR-708 | EDA2R   | 1 | 1 | 0 | 1 | 0 | 0 | 1 | 0 | 0 | 1 | 5 |
| hsa-miR-708 | EDARADD | 1 | 0 | 0 | 1 | 0 | 0 | 1 | 0 | 0 | 1 | 4 |
| hsa-miR-708 | EDEM1   | 1 | 1 | 0 | 1 | 0 | 0 | 1 | 0 | 0 | 1 | 5 |
| hsa-miR-708 | EDG1    | 1 | 1 | 0 | 1 | 0 | 0 | 1 | 0 | 0 | 1 | 5 |
| hsa-miR-708 | EDG4    | 1 | 1 | 0 | 1 | 0 | 0 | 1 | 0 | 0 | 0 | 4 |
| hsa-miR-708 | EEF2K   | 1 | 1 | 0 | 1 | 0 | 0 | 1 | 0 | 0 | 0 | 4 |
| hsa-miR-708 | EEPD1   | 1 | 1 | 0 | 1 | 0 | 0 | 1 | 0 | 0 | 1 | 5 |
| hsa-miR-708 | EFHD1   | 1 | 1 | 0 | 1 | 0 | 0 | 1 | 0 | 0 | 0 | 4 |
| hsa-miR-708 | EFHD2   | 1 | 1 | 0 | 1 | 0 | 0 | 1 | 0 | 0 | 1 | 5 |
| hsa-miR-708 | EFNA5   | 1 | 1 | 0 | 1 | 0 | 0 | 1 | 0 | 0 | 1 | 5 |
| hsa-miR-708 | EFNB1   | 1 | 1 | 0 | 1 | 0 | 0 | 1 | 0 | 0 | 1 | 5 |
| hsa-miR-708 | EFNB3   | 1 | 1 | 0 | 1 | 0 | 0 | 1 | 0 | 0 | 1 | 5 |
| hsa-miR-708 | EFTUD2  | 1 | 1 | 0 | 1 | 0 | 0 | 1 | 0 | 0 | 1 | 5 |
| hsa-miR-708 | EGLN2   | 1 | 1 | 0 | 1 | 0 | 0 | 0 | 0 | 0 | 1 | 4 |

|             |          |   |   |   |   |   |   |   |   |   |   |   |
|-------------|----------|---|---|---|---|---|---|---|---|---|---|---|
| hsa-miR-708 | EGR2     | 1 | 1 | 0 | 1 | 0 | 0 | 1 | 0 | 0 | 0 | 4 |
| hsa-miR-708 | EGR3     | 1 | 1 | 0 | 1 | 0 | 0 | 1 | 0 | 0 | 0 | 4 |
| hsa-miR-708 | EHD1     | 1 | 1 | 0 | 1 | 0 | 0 | 1 | 0 | 0 | 1 | 5 |
| hsa-miR-708 | EHF      | 1 | 1 | 0 | 1 | 0 | 0 | 1 | 0 | 0 | 1 | 5 |
| hsa-miR-708 | EIF2A    | 1 | 1 | 0 | 1 | 0 | 0 | 1 | 0 | 0 | 1 | 5 |
| hsa-miR-708 | EIF2AK1  | 1 | 1 | 1 | 1 | 0 | 0 | 1 | 0 | 0 | 1 | 6 |
| hsa-miR-708 | EIF2C1   | 1 | 1 | 1 | 1 | 0 | 0 | 1 | 0 | 0 | 1 | 6 |
| hsa-miR-708 | EIF4E3   | 1 | 1 | 0 | 1 | 0 | 0 | 0 | 0 | 0 | 1 | 4 |
| hsa-miR-708 | ELAVL1   | 0 | 1 | 0 | 1 | 0 | 0 | 1 | 0 | 0 | 1 | 4 |
| hsa-miR-708 | ELFN2    | 0 | 1 | 0 | 1 | 0 | 0 | 1 | 0 | 0 | 1 | 4 |
| hsa-miR-708 | ELOVL7   | 1 | 1 | 0 | 1 | 0 | 0 | 0 | 0 | 0 | 1 | 4 |
| hsa-miR-708 | EMID2    | 1 | 1 | 0 | 0 | 0 | 0 | 1 | 0 | 0 | 1 | 4 |
| hsa-miR-708 | EMILIN2  | 1 | 1 | 0 | 1 | 0 | 0 | 1 | 0 | 0 | 0 | 4 |
| hsa-miR-708 | EMX2     | 1 | 1 | 0 | 1 | 0 | 0 | 1 | 0 | 0 | 0 | 4 |
| hsa-miR-708 | EN2      | 1 | 1 | 1 | 1 | 0 | 0 | 1 | 0 | 0 | 1 | 6 |
| hsa-miR-708 | ENAH     | 1 | 1 | 0 | 1 | 0 | 0 | 1 | 0 | 0 | 1 | 5 |
| hsa-miR-708 | ENG      | 1 | 1 | 0 | 1 | 0 | 0 | 1 | 0 | 0 | 1 | 5 |
| hsa-miR-708 | ENO2     | 1 | 1 | 0 | 1 | 0 | 0 | 1 | 0 | 0 | 0 | 4 |
| hsa-miR-708 | ENPEP    | 0 | 1 | 0 | 1 | 0 | 0 | 1 | 0 | 0 | 1 | 4 |
| hsa-miR-708 | ENPP5    | 1 | 1 | 0 | 1 | 0 | 0 | 1 | 0 | 0 | 0 | 4 |
| hsa-miR-708 | ENTPD2   | 1 | 1 | 0 | 0 | 0 | 0 | 1 | 0 | 0 | 1 | 4 |
| hsa-miR-708 | EP400    | 1 | 1 | 0 | 1 | 0 | 0 | 1 | 0 | 0 | 1 | 5 |
| hsa-miR-708 | EPB41L1  | 1 | 1 | 0 | 1 | 0 | 0 | 1 | 0 | 0 | 1 | 5 |
| hsa-miR-708 | EPB41L4A | 1 | 1 | 0 | 1 | 0 | 0 | 1 | 0 | 0 | 1 | 5 |
| hsa-miR-708 | EPB41L4B | 1 | 1 | 0 | 1 | 0 | 0 | 1 | 0 | 0 | 1 | 5 |
| hsa-miR-708 | EPB41L5  | 1 | 1 | 0 | 1 | 0 | 0 | 1 | 0 | 0 | 1 | 5 |
| hsa-miR-708 | EPDR1    | 1 | 1 | 0 | 1 | 0 | 0 | 1 | 0 | 0 | 1 | 5 |
| hsa-miR-708 | EPHA3    | 1 | 1 | 0 | 1 | 0 | 0 | 1 | 0 | 0 | 1 | 5 |
| hsa-miR-708 | EPHA4    | 1 | 1 | 0 | 1 | 0 | 0 | 1 | 0 | 0 | 0 | 4 |
| hsa-miR-708 | EPHB1    | 1 | 1 | 0 | 1 | 0 | 0 | 1 | 0 | 0 | 1 | 5 |
| hsa-miR-708 | EPN2     | 1 | 1 | 0 | 1 | 0 | 0 | 1 | 0 | 0 | 1 | 5 |
| hsa-miR-708 | EPN3     | 1 | 1 | 0 | 1 | 0 | 0 | 1 | 0 | 0 | 1 | 5 |
| hsa-miR-708 | ERBB4    | 1 | 1 | 0 | 0 | 0 | 0 | 1 | 0 | 0 | 1 | 4 |
| hsa-miR-708 | ERC1     | 1 | 1 | 0 | 1 | 0 | 0 | 0 | 0 | 0 | 1 | 4 |
| hsa-miR-708 | EREG     | 1 | 1 | 0 | 1 | 0 | 0 | 1 | 0 | 0 | 0 | 4 |
| hsa-miR-708 | ERICH1   | 1 | 1 | 0 | 1 | 0 | 0 | 1 | 0 | 0 | 1 | 5 |
| hsa-miR-708 | ERLIN1   | 1 | 1 | 0 | 1 | 0 | 0 | 0 | 0 | 0 | 1 | 4 |
| hsa-miR-708 | ERLIN2   | 1 | 1 | 0 | 1 | 0 | 0 | 1 | 0 | 0 | 1 | 5 |
| hsa-miR-708 | ESCO2    | 1 | 1 | 1 | 1 | 0 | 0 | 1 | 0 | 0 | 1 | 6 |
| hsa-miR-708 | ETF1     | 1 | 1 | 1 | 1 | 0 | 0 | 1 | 0 | 0 | 1 | 6 |
| hsa-miR-708 | ETNK1    | 1 | 1 | 0 | 0 | 0 | 0 | 1 | 0 | 0 | 1 | 4 |
| hsa-miR-708 | ETNK2    | 1 | 1 | 0 | 1 | 0 | 0 | 1 | 0 | 0 | 1 | 5 |
| hsa-miR-708 | ETS2     | 1 | 1 | 0 | 1 | 0 | 0 | 1 | 0 | 0 | 0 | 4 |
| hsa-miR-708 | ETV6     | 1 | 1 | 0 | 1 | 0 | 0 | 1 | 0 | 0 | 1 | 5 |

|             |         |   |   |   |   |   |   |   |   |   |   |   |
|-------------|---------|---|---|---|---|---|---|---|---|---|---|---|
| hsa-miR-708 | EVC     | 1 | 1 | 0 | 1 | 0 | 0 | 1 | 0 | 0 | 1 | 5 |
| hsa-miR-708 | EXDL1   | 1 | 1 | 0 | 1 | 0 | 0 | 1 | 0 | 0 | 0 | 4 |
| hsa-miR-708 | EXOC2   | 1 | 1 | 0 | 1 | 0 | 0 | 1 | 0 | 0 | 0 | 4 |
| hsa-miR-708 | EXOC3   | 1 | 1 | 0 | 1 | 0 | 0 | 1 | 0 | 0 | 0 | 4 |
| hsa-miR-708 | EXOC7   | 1 | 0 | 0 | 1 | 0 | 0 | 1 | 0 | 0 | 1 | 4 |
| hsa-miR-708 | EXOSC5  | 1 | 1 | 0 | 1 | 0 | 0 | 1 | 0 | 0 | 1 | 5 |
| hsa-miR-708 | EXTL3   | 1 | 1 | 0 | 1 | 0 | 0 | 1 | 0 | 0 | 1 | 5 |
| hsa-miR-708 | EYA3    | 1 | 1 | 0 | 0 | 0 | 0 | 1 | 0 | 0 | 1 | 4 |
| hsa-miR-708 | EZH1    | 1 | 1 | 0 | 1 | 0 | 0 | 1 | 0 | 0 | 1 | 5 |
| hsa-miR-708 | F2RL2   | 1 | 1 | 0 | 1 | 0 | 0 | 1 | 0 | 0 | 1 | 5 |
| hsa-miR-708 | F8      | 1 | 1 | 0 | 1 | 0 | 0 | 1 | 0 | 0 | 0 | 4 |
| hsa-miR-708 | FADD    | 1 | 1 | 0 | 1 | 0 | 0 | 1 | 0 | 0 | 1 | 5 |
| hsa-miR-708 | FAIM2   | 1 | 1 | 1 | 1 | 0 | 0 | 1 | 0 | 0 | 1 | 6 |
| hsa-miR-708 | FAM100A | 1 | 1 | 0 | 0 | 0 | 0 | 1 | 0 | 0 | 1 | 4 |
| hsa-miR-708 | FAM102A | 1 | 1 | 0 | 1 | 0 | 0 | 1 | 0 | 0 | 1 | 5 |
| hsa-miR-708 | FAM105B | 1 | 1 | 0 | 1 | 0 | 0 | 1 | 0 | 0 | 1 | 5 |
| hsa-miR-708 | FAM107A | 1 | 0 | 1 | 1 | 0 | 0 | 1 | 0 | 0 | 1 | 5 |
| hsa-miR-708 | FAM107B | 1 | 1 | 0 | 1 | 0 | 0 | 1 | 0 | 0 | 0 | 4 |
| hsa-miR-708 | FAM109A | 1 | 1 | 0 | 1 | 0 | 0 | 1 | 0 | 0 | 1 | 5 |
| hsa-miR-708 | FAM119B | 1 | 1 | 0 | 1 | 0 | 0 | 1 | 0 | 0 | 1 | 5 |
| hsa-miR-708 | FAM123B | 1 | 1 | 0 | 1 | 0 | 0 | 1 | 0 | 0 | 1 | 5 |
| hsa-miR-708 | FAM123C | 0 | 1 | 0 | 1 | 0 | 0 | 1 | 0 | 0 | 1 | 4 |
| hsa-miR-708 | FAM125B | 1 | 1 | 0 | 1 | 0 | 0 | 1 | 0 | 0 | 1 | 5 |
| hsa-miR-708 | FAM126A | 1 | 1 | 1 | 1 | 0 | 0 | 1 | 0 | 0 | 1 | 6 |
| hsa-miR-708 | FAM127B | 1 | 1 | 0 | 1 | 0 | 0 | 1 | 0 | 0 | 1 | 5 |
| hsa-miR-708 | FAM129B | 1 | 1 | 0 | 1 | 0 | 0 | 1 | 0 | 0 | 0 | 4 |
| hsa-miR-708 | FAM131B | 1 | 1 | 0 | 1 | 0 | 0 | 1 | 0 | 0 | 1 | 5 |
| hsa-miR-708 | FAM134A | 1 | 1 | 0 | 1 | 0 | 0 | 1 | 0 | 0 | 1 | 5 |
| hsa-miR-708 | FAM134C | 1 | 1 | 0 | 1 | 0 | 0 | 1 | 0 | 0 | 1 | 5 |
| hsa-miR-708 | FAM135B | 1 | 1 | 0 | 1 | 0 | 0 | 1 | 0 | 0 | 1 | 5 |
| hsa-miR-708 | FAM18A  | 1 | 1 | 0 | 1 | 0 | 0 | 1 | 0 | 0 | 0 | 4 |
| hsa-miR-708 | FAM18B2 | 1 | 1 | 0 | 1 | 0 | 0 | 1 | 0 | 0 | 1 | 5 |
| hsa-miR-708 | FAM26B  | 1 | 1 | 0 | 1 | 0 | 0 | 1 | 0 | 0 | 1 | 5 |
| hsa-miR-708 | FAM26E  | 1 | 1 | 0 | 1 | 0 | 0 | 1 | 0 | 0 | 1 | 5 |
| hsa-miR-708 | FAM32A  | 1 | 1 | 0 | 1 | 0 | 0 | 1 | 0 | 0 | 1 | 5 |
| hsa-miR-708 | FAM38B  | 1 | 1 | 0 | 1 | 0 | 0 | 1 | 0 | 0 | 1 | 5 |
| hsa-miR-708 | FAM3D   | 1 | 1 | 0 | 1 | 0 | 0 | 1 | 0 | 0 | 1 | 5 |
| hsa-miR-708 | FAM43A  | 0 | 1 | 0 | 1 | 0 | 0 | 1 | 0 | 0 | 1 | 4 |
| hsa-miR-708 | FAM46C  | 1 | 1 | 0 | 1 | 0 | 0 | 1 | 0 | 0 | 1 | 5 |
| hsa-miR-708 | FAM53B  | 1 | 1 | 0 | 0 | 0 | 0 | 1 | 0 | 0 | 1 | 4 |
| hsa-miR-708 | FAM53C  | 1 | 0 | 0 | 1 | 0 | 0 | 1 | 0 | 0 | 1 | 4 |
| hsa-miR-708 | FAM5B   | 1 | 1 | 0 | 1 | 0 | 0 | 1 | 0 | 0 | 1 | 5 |
| hsa-miR-708 | FAM62A  | 1 | 1 | 0 | 1 | 0 | 0 | 1 | 0 | 0 | 1 | 5 |
| hsa-miR-708 | FAM71F2 | 1 | 1 | 0 | 1 | 0 | 0 | 1 | 0 | 0 | 0 | 4 |

|             |          |   |   |   |   |   |   |   |   |   |   |   |
|-------------|----------|---|---|---|---|---|---|---|---|---|---|---|
| hsa-miR-708 | FAM73A   | 1 | 1 | 0 | 1 | 0 | 0 | 1 | 0 | 0 | 1 | 5 |
| hsa-miR-708 | FAM78A   | 1 | 1 | 0 | 1 | 0 | 0 | 1 | 0 | 0 | 1 | 5 |
| hsa-miR-708 | FAM84A   | 1 | 1 | 0 | 1 | 0 | 0 | 1 | 0 | 0 | 1 | 5 |
| hsa-miR-708 | FAM91A1  | 1 | 1 | 0 | 1 | 0 | 0 | 1 | 0 | 0 | 1 | 5 |
| hsa-miR-708 | FAM96B   | 1 | 1 | 0 | 1 | 0 | 0 | 1 | 0 | 0 | 1 | 5 |
| hsa-miR-708 | FAM9A    | 1 | 1 | 0 | 1 | 0 | 0 | 1 | 0 | 0 | 1 | 5 |
| hsa-miR-708 | FAM9B    | 1 | 1 | 0 | 0 | 0 | 0 | 1 | 0 | 0 | 1 | 4 |
| hsa-miR-708 | FASLG    | 1 | 1 | 0 | 1 | 0 | 0 | 1 | 0 | 0 | 1 | 5 |
| hsa-miR-708 | FBXL16   | 1 | 1 | 0 | 0 | 0 | 0 | 1 | 0 | 0 | 1 | 4 |
| hsa-miR-708 | FBXL18   | 1 | 1 | 1 | 1 | 0 | 0 | 1 | 0 | 0 | 1 | 6 |
| hsa-miR-708 | FBXO21   | 1 | 1 | 0 | 1 | 0 | 0 | 1 | 0 | 0 | 1 | 5 |
| hsa-miR-708 | FBXO40   | 1 | 1 | 0 | 1 | 0 | 0 | 1 | 0 | 0 | 1 | 5 |
| hsa-miR-708 | FBXO41   | 1 | 1 | 0 | 1 | 0 | 0 | 1 | 0 | 0 | 1 | 5 |
| hsa-miR-708 | FBXO45   | 1 | 1 | 1 | 1 | 0 | 0 | 1 | 0 | 0 | 1 | 6 |
| hsa-miR-708 | FBXW2    | 1 | 1 | 0 | 1 | 0 | 0 | 1 | 0 | 0 | 1 | 5 |
| hsa-miR-708 | FBXW4    | 1 | 1 | 0 | 1 | 0 | 0 | 1 | 0 | 0 | 1 | 5 |
| hsa-miR-708 | FCRL1    | 1 | 1 | 0 | 1 | 0 | 0 | 1 | 0 | 0 | 0 | 4 |
| hsa-miR-708 | FCRL3    | 1 | 1 | 0 | 1 | 0 | 0 | 1 | 0 | 0 | 1 | 5 |
| hsa-miR-708 | FECH     | 1 | 1 | 0 | 1 | 0 | 0 | 1 | 0 | 0 | 1 | 5 |
| hsa-miR-708 | FEM1C    | 1 | 1 | 0 | 1 | 0 | 0 | 1 | 0 | 0 | 1 | 5 |
| hsa-miR-708 | FERMT1   | 1 | 1 | 0 | 1 | 0 | 0 | 1 | 0 | 0 | 1 | 5 |
| hsa-miR-708 | FES      | 1 | 1 | 0 | 1 | 0 | 0 | 1 | 0 | 0 | 1 | 5 |
| hsa-miR-708 | FEV      | 1 | 1 | 1 | 1 | 0 | 0 | 1 | 0 | 0 | 1 | 6 |
| hsa-miR-708 | FGD2     | 1 | 1 | 0 | 1 | 0 | 0 | 1 | 0 | 0 | 1 | 5 |
| hsa-miR-708 | FGF11    | 1 | 1 | 0 | 1 | 0 | 0 | 1 | 0 | 0 | 1 | 5 |
| hsa-miR-708 | FGF23    | 1 | 1 | 1 | 1 | 0 | 0 | 1 | 0 | 0 | 1 | 6 |
| hsa-miR-708 | FGF3     | 1 | 1 | 0 | 1 | 0 | 0 | 1 | 0 | 0 | 1 | 5 |
| hsa-miR-708 | FHDC1    | 1 | 1 | 0 | 1 | 0 | 0 | 1 | 0 | 0 | 1 | 5 |
| hsa-miR-708 | FHL3     | 1 | 1 | 0 | 1 | 0 | 0 | 1 | 0 | 0 | 0 | 4 |
| hsa-miR-708 | FHOD1    | 1 | 1 | 0 | 1 | 0 | 0 | 1 | 0 | 0 | 1 | 5 |
| hsa-miR-708 | FIBIN    | 1 | 1 | 0 | 1 | 0 | 0 | 1 | 0 | 0 | 1 | 5 |
| hsa-miR-708 | FIGN     | 1 | 1 | 0 | 1 | 0 | 0 | 1 | 0 | 0 | 0 | 4 |
| hsa-miR-708 | FKBP10   | 1 | 1 | 0 | 1 | 0 | 0 | 1 | 0 | 0 | 1 | 5 |
| hsa-miR-708 | FKTN     | 0 | 0 | 1 | 1 | 0 | 0 | 1 | 0 | 0 | 1 | 4 |
| hsa-miR-708 | FLJ10213 | 0 | 1 | 1 | 1 | 0 | 0 | 1 | 0 | 0 | 1 | 5 |
| hsa-miR-708 | FLJ10357 | 1 | 1 | 0 | 1 | 0 | 0 | 1 | 0 | 0 | 1 | 5 |
| hsa-miR-708 | FLJ10490 | 0 | 1 | 0 | 1 | 0 | 0 | 1 | 0 | 0 | 1 | 4 |
| hsa-miR-708 | FLJ10769 | 1 | 1 | 0 | 1 | 0 | 0 | 1 | 0 | 0 | 1 | 5 |
| hsa-miR-708 | FLJ11151 | 0 | 1 | 0 | 1 | 0 | 0 | 1 | 0 | 0 | 1 | 4 |
| hsa-miR-708 | FLJ11184 | 1 | 1 | 1 | 1 | 0 | 0 | 1 | 0 | 0 | 1 | 6 |
| hsa-miR-708 | FLJ11506 | 1 | 1 | 0 | 0 | 0 | 0 | 1 | 0 | 0 | 1 | 4 |
| hsa-miR-708 | FLJ12529 | 1 | 1 | 0 | 1 | 0 | 0 | 1 | 0 | 0 | 1 | 5 |
| hsa-miR-708 | FLJ14213 | 1 | 1 | 0 | 1 | 0 | 0 | 1 | 0 | 0 | 1 | 5 |
| hsa-miR-708 | FLJ20309 | 1 | 1 | 0 | 1 | 0 | 0 | 1 | 0 | 0 | 1 | 5 |

|             |          |   |   |   |   |   |   |   |   |   |   |   |
|-------------|----------|---|---|---|---|---|---|---|---|---|---|---|
| hsa-miR-708 | FLJ20489 | 1 | 1 | 0 | 1 | 0 | 0 | 1 | 0 | 0 | 0 | 4 |
| hsa-miR-708 | FLJ20674 | 1 | 1 | 0 | 1 | 0 | 0 | 1 | 0 | 0 | 1 | 5 |
| hsa-miR-708 | FLJ21062 | 1 | 1 | 0 | 1 | 0 | 0 | 0 | 0 | 0 | 1 | 4 |
| hsa-miR-708 | FLJ21865 | 1 | 1 | 0 | 1 | 0 | 0 | 1 | 0 | 0 | 1 | 5 |
| hsa-miR-708 | FLJ30851 | 1 | 1 | 0 | 1 | 0 | 0 | 1 | 0 | 0 | 1 | 5 |
| hsa-miR-708 | FLJ36031 | 0 | 1 | 0 | 1 | 0 | 0 | 1 | 0 | 0 | 1 | 4 |
| hsa-miR-708 | FLJ36070 | 1 | 1 | 0 | 1 | 0 | 0 | 0 | 0 | 0 | 1 | 4 |
| hsa-miR-708 | FLJ37078 | 1 | 1 | 0 | 1 | 0 | 0 | 0 | 0 | 0 | 1 | 4 |
| hsa-miR-708 | FLJ39743 | 0 | 1 | 0 | 1 | 0 | 0 | 1 | 0 | 0 | 1 | 4 |
| hsa-miR-708 | FLJ45224 | 1 | 1 | 0 | 1 | 0 | 0 | 1 | 0 | 0 | 0 | 4 |
| hsa-miR-708 | FLYWCH1  | 1 | 1 | 0 | 1 | 0 | 0 | 1 | 0 | 0 | 1 | 5 |
| hsa-miR-708 | FMNL3    | 1 | 1 | 1 | 1 | 0 | 0 | 1 | 0 | 0 | 1 | 6 |
| hsa-miR-708 | FMO2     | 1 | 1 | 0 | 1 | 0 | 0 | 1 | 0 | 0 | 1 | 5 |
| hsa-miR-708 | FNBP1    | 1 | 1 | 0 | 1 | 0 | 0 | 1 | 0 | 0 | 1 | 5 |
| hsa-miR-708 | FNDC5    | 1 | 1 | 0 | 1 | 0 | 0 | 1 | 0 | 0 | 0 | 4 |
| hsa-miR-708 | FNDC7    | 0 | 0 | 1 | 1 | 0 | 0 | 1 | 0 | 0 | 1 | 4 |
| hsa-miR-708 | FNTA     | 1 | 1 | 0 | 1 | 0 | 0 | 1 | 0 | 0 | 1 | 5 |
| hsa-miR-708 | FOSL2    | 1 | 1 | 0 | 1 | 0 | 0 | 1 | 0 | 0 | 1 | 5 |
| hsa-miR-708 | FOXJ3    | 1 | 1 | 1 | 0 | 0 | 0 | 1 | 0 | 0 | 1 | 5 |
| hsa-miR-708 | FOXK1    | 1 | 1 | 0 | 1 | 0 | 0 | 1 | 0 | 0 | 1 | 5 |
| hsa-miR-708 | FOXK2    | 1 | 1 | 0 | 1 | 0 | 0 | 1 | 0 | 0 | 1 | 5 |
| hsa-miR-708 | FOXL2    | 0 | 1 | 0 | 1 | 0 | 0 | 1 | 0 | 0 | 1 | 4 |
| hsa-miR-708 | FOXN1    | 1 | 1 | 0 | 1 | 0 | 0 | 1 | 0 | 0 | 1 | 5 |
| hsa-miR-708 | FOXN3    | 1 | 1 | 0 | 1 | 0 | 0 | 0 | 0 | 0 | 1 | 4 |
| hsa-miR-708 | FOXO1    | 1 | 1 | 1 | 1 | 0 | 0 | 1 | 0 | 0 | 1 | 6 |
| hsa-miR-708 | FOXO3    | 0 | 1 | 0 | 1 | 0 | 0 | 1 | 0 | 0 | 1 | 4 |
| hsa-miR-708 | FOXO4    | 1 | 1 | 0 | 1 | 0 | 0 | 1 | 0 | 0 | 0 | 4 |
| hsa-miR-708 | FOXP1    | 1 | 1 | 0 | 0 | 0 | 0 | 1 | 0 | 0 | 1 | 4 |
| hsa-miR-708 | FRAS1    | 1 | 1 | 0 | 1 | 0 | 0 | 1 | 0 | 0 | 1 | 5 |
| hsa-miR-708 | FREM2    | 1 | 1 | 0 | 0 | 0 | 0 | 1 | 0 | 0 | 1 | 4 |
| hsa-miR-708 | FREQ     | 0 | 1 | 0 | 1 | 0 | 0 | 1 | 0 | 0 | 1 | 4 |
| hsa-miR-708 | FRMD4A   | 1 | 1 | 0 | 0 | 0 | 0 | 1 | 0 | 0 | 1 | 4 |
| hsa-miR-708 | FRMD4B   | 1 | 1 | 0 | 1 | 0 | 0 | 1 | 0 | 0 | 1 | 5 |
| hsa-miR-708 | FRMD8    | 1 | 1 | 0 | 1 | 0 | 0 | 1 | 0 | 0 | 0 | 4 |
| hsa-miR-708 | FRS2     | 1 | 1 | 0 | 1 | 0 | 0 | 0 | 0 | 0 | 1 | 4 |
| hsa-miR-708 | FSHB     | 1 | 0 | 1 | 1 | 0 | 0 | 1 | 0 | 0 | 1 | 5 |
| hsa-miR-708 | FSTL3    | 1 | 1 | 0 | 1 | 0 | 0 | 1 | 0 | 0 | 0 | 4 |
| hsa-miR-708 | FSTL4    | 1 | 1 | 0 | 0 | 0 | 0 | 1 | 0 | 0 | 1 | 4 |
| hsa-miR-708 | FTSJ2    | 1 | 1 | 1 | 1 | 0 | 0 | 1 | 0 | 0 | 1 | 6 |
| hsa-miR-708 | FUT8     | 1 | 0 | 0 | 1 | 0 | 0 | 1 | 0 | 0 | 1 | 4 |
| hsa-miR-708 | FXC1     | 1 | 1 | 0 | 1 | 0 | 0 | 1 | 0 | 0 | 0 | 4 |
| hsa-miR-708 | FYCO1    | 1 | 1 | 0 | 0 | 0 | 0 | 1 | 0 | 0 | 1 | 4 |
| hsa-miR-708 | FZD1     | 1 | 1 | 0 | 1 | 0 | 0 | 1 | 0 | 0 | 1 | 5 |
| hsa-miR-708 | FZD10    | 1 | 1 | 0 | 1 | 0 | 0 | 1 | 0 | 0 | 1 | 5 |

|             |            |   |   |   |   |   |   |   |   |   |   |   |
|-------------|------------|---|---|---|---|---|---|---|---|---|---|---|
| hsa-miR-708 | FZD4       | 1 | 1 | 0 | 1 | 0 | 0 | 1 | 0 | 0 | 1 | 5 |
| hsa-miR-708 | FZD5       | 1 | 1 | 0 | 1 | 0 | 0 | 1 | 0 | 0 | 0 | 4 |
| hsa-miR-708 | FZD8       | 1 | 1 | 0 | 1 | 0 | 0 | 1 | 0 | 0 | 1 | 5 |
| hsa-miR-708 | FZR1       | 1 | 0 | 0 | 1 | 0 | 0 | 1 | 0 | 0 | 1 | 4 |
| hsa-miR-708 | GAA        | 1 | 0 | 0 | 1 | 0 | 0 | 1 | 0 | 0 | 1 | 4 |
| hsa-miR-708 | GABRQ      | 1 | 1 | 0 | 1 | 0 | 0 | 1 | 0 | 0 | 0 | 4 |
| hsa-miR-708 | GAL3ST2    | 1 | 1 | 0 | 1 | 0 | 0 | 1 | 0 | 0 | 1 | 5 |
| hsa-miR-708 | ALNAC4S-6S | 1 | 1 | 0 | 1 | 0 | 0 | 1 | 0 | 0 | 1 | 5 |
| hsa-miR-708 | GALNT6     | 1 | 1 | 1 | 1 | 0 | 0 | 1 | 0 | 0 | 1 | 6 |
| hsa-miR-708 | GALNT9     | 1 | 1 | 0 | 1 | 0 | 0 | 0 | 0 | 0 | 1 | 4 |
| hsa-miR-708 | GALP       | 1 | 1 | 0 | 0 | 0 | 0 | 1 | 0 | 0 | 1 | 4 |
| hsa-miR-708 | GANAB      | 1 | 1 | 0 | 1 | 0 | 0 | 1 | 0 | 0 | 0 | 4 |
| hsa-miR-708 | GAPVD1     | 1 | 1 | 0 | 1 | 0 | 0 | 1 | 0 | 0 | 1 | 5 |
| hsa-miR-708 | GARNL4     | 0 | 1 | 0 | 1 | 0 | 0 | 1 | 0 | 0 | 1 | 4 |
| hsa-miR-708 | GAS1       | 1 | 1 | 0 | 1 | 0 | 0 | 1 | 0 | 0 | 1 | 5 |
| hsa-miR-708 | GAS2L1     | 1 | 1 | 0 | 1 | 0 | 0 | 1 | 0 | 0 | 0 | 4 |
| hsa-miR-708 | GAS7       | 1 | 1 | 0 | 1 | 0 | 0 | 1 | 0 | 0 | 1 | 5 |
| hsa-miR-708 | GATAD2A    | 0 | 1 | 0 | 1 | 0 | 0 | 1 | 0 | 0 | 1 | 4 |
| hsa-miR-708 | GBP6       | 1 | 1 | 0 | 1 | 0 | 0 | 1 | 0 | 0 | 0 | 4 |
| hsa-miR-708 | GCHFR      | 1 | 1 | 0 | 1 | 0 | 0 | 1 | 0 | 0 | 1 | 5 |
| hsa-miR-708 | GCNT3      | 1 | 1 | 0 | 1 | 0 | 0 | 1 | 0 | 0 | 1 | 5 |
| hsa-miR-708 | GDA        | 1 | 1 | 0 | 1 | 0 | 0 | 1 | 0 | 0 | 1 | 5 |
| hsa-miR-708 | GDPD5      | 1 | 1 | 0 | 1 | 0 | 0 | 1 | 0 | 0 | 1 | 5 |
| hsa-miR-708 | GFI1B      | 0 | 1 | 0 | 1 | 0 | 0 | 1 | 0 | 0 | 1 | 4 |
| hsa-miR-708 | GFOD1      | 1 | 1 | 0 | 1 | 0 | 0 | 1 | 0 | 0 | 1 | 5 |
| hsa-miR-708 | GFPT2      | 1 | 1 | 0 | 1 | 0 | 0 | 1 | 0 | 0 | 0 | 4 |
| hsa-miR-708 | GGA2       | 1 | 1 | 0 | 1 | 0 | 0 | 1 | 0 | 0 | 1 | 5 |
| hsa-miR-708 | GGA3       | 1 | 1 | 0 | 1 | 0 | 0 | 1 | 0 | 0 | 1 | 5 |
| hsa-miR-708 | GIGYF1     | 1 | 1 | 0 | 1 | 0 | 0 | 1 | 0 | 0 | 1 | 5 |
| hsa-miR-708 | GIT2       | 1 | 1 | 1 | 1 | 0 | 0 | 1 | 0 | 0 | 1 | 6 |
| hsa-miR-708 | GJA3       | 1 | 1 | 0 | 1 | 0 | 0 | 1 | 0 | 0 | 1 | 5 |
| hsa-miR-708 | GJA5       | 1 | 0 | 0 | 1 | 0 | 0 | 1 | 0 | 0 | 1 | 4 |
| hsa-miR-708 | GJC2       | 1 | 1 | 0 | 1 | 0 | 0 | 1 | 0 | 0 | 1 | 5 |
| hsa-miR-708 | GLCCI1     | 1 | 1 | 0 | 1 | 0 | 0 | 1 | 0 | 0 | 0 | 4 |
| hsa-miR-708 | GLCE       | 1 | 1 | 0 | 1 | 0 | 0 | 1 | 0 | 0 | 0 | 4 |
| hsa-miR-708 | GLG1       | 1 | 1 | 0 | 1 | 0 | 0 | 1 | 0 | 0 | 1 | 5 |
| hsa-miR-708 | GLIPR1     | 1 | 1 | 0 | 1 | 0 | 0 | 1 | 0 | 0 | 0 | 4 |
| hsa-miR-708 | GLIS2      | 1 | 1 | 0 | 1 | 0 | 0 | 1 | 0 | 0 | 1 | 5 |
| hsa-miR-708 | GLIS3      | 1 | 1 | 0 | 0 | 0 | 0 | 1 | 0 | 0 | 1 | 4 |
| hsa-miR-708 | GLRX       | 1 | 1 | 0 | 1 | 0 | 0 | 1 | 0 | 0 | 1 | 5 |
| hsa-miR-708 | GLYAT      | 1 | 1 | 0 | 1 | 0 | 0 | 1 | 0 | 0 | 1 | 5 |
| hsa-miR-708 | GMPPA      | 1 | 1 | 0 | 1 | 0 | 0 | 0 | 0 | 0 | 1 | 4 |
| hsa-miR-708 | GNA12      | 1 | 1 | 0 | 1 | 0 | 0 | 1 | 0 | 0 | 1 | 5 |
| hsa-miR-708 | GNAI1      | 1 | 1 | 0 | 1 | 0 | 0 | 1 | 0 | 0 | 1 | 5 |



|             |         |   |   |   |   |   |   |   |   |   |   |   |
|-------------|---------|---|---|---|---|---|---|---|---|---|---|---|
| hsa-miR-708 | GNAO1   | 1 | 1 | 0 | 1 | 0 | 0 | 0 | 0 | 0 | 1 | 4 |
| hsa-miR-708 | GNB4    | 0 | 1 | 0 | 1 | 0 | 0 | 1 | 0 | 0 | 1 | 4 |
| hsa-miR-708 | GNG12   | 1 | 1 | 0 | 1 | 0 | 0 | 1 | 0 | 0 | 1 | 5 |
| hsa-miR-708 | GNG2    | 1 | 1 | 0 | 1 | 0 | 0 | 1 | 0 | 0 | 1 | 5 |
| hsa-miR-708 | GNPNAT1 | 1 | 1 | 0 | 1 | 0 | 0 | 1 | 0 | 0 | 0 | 4 |
| hsa-miR-708 | GON4L   | 1 | 1 | 1 | 1 | 0 | 0 | 1 | 0 | 0 | 1 | 6 |
| hsa-miR-708 | GORASP2 | 1 | 1 | 0 | 1 | 0 | 0 | 1 | 0 | 0 | 0 | 4 |
| hsa-miR-708 | GOSR1   | 1 | 0 | 0 | 1 | 0 | 0 | 1 | 0 | 0 | 1 | 4 |
| hsa-miR-708 | GPA33   | 1 | 1 | 0 | 0 | 0 | 0 | 1 | 0 | 0 | 1 | 4 |
| hsa-miR-708 | GPD1    | 1 | 1 | 0 | 1 | 0 | 0 | 1 | 0 | 0 | 1 | 5 |
| hsa-miR-708 | GPER    | 1 | 0 | 0 | 1 | 0 | 0 | 1 | 0 | 0 | 1 | 4 |
| hsa-miR-708 | GPM6A   | 1 | 0 | 1 | 1 | 0 | 0 | 1 | 0 | 0 | 1 | 5 |
| hsa-miR-708 | GPR107  | 1 | 1 | 0 | 1 | 0 | 0 | 1 | 0 | 0 | 1 | 5 |
| hsa-miR-708 | GPR116  | 1 | 1 | 0 | 1 | 0 | 0 | 1 | 0 | 0 | 1 | 5 |
| hsa-miR-708 | GPR158  | 1 | 1 | 0 | 1 | 0 | 0 | 1 | 0 | 0 | 1 | 5 |
| hsa-miR-708 | GPR26   | 1 | 1 | 1 | 1 | 0 | 0 | 1 | 0 | 0 | 1 | 6 |
| hsa-miR-708 | GPR37L1 | 1 | 1 | 0 | 1 | 0 | 0 | 1 | 0 | 0 | 0 | 4 |
| hsa-miR-708 | GPR44   | 1 | 1 | 0 | 1 | 0 | 0 | 1 | 0 | 0 | 1 | 5 |
| hsa-miR-708 | GPR45   | 1 | 1 | 0 | 1 | 0 | 0 | 1 | 0 | 0 | 1 | 5 |
| hsa-miR-708 | GPR64   | 1 | 1 | 0 | 1 | 0 | 0 | 0 | 0 | 0 | 1 | 4 |
| hsa-miR-708 | GPR81   | 0 | 1 | 0 | 1 | 0 | 0 | 1 | 0 | 0 | 1 | 4 |
| hsa-miR-708 | GPR83   | 1 | 1 | 0 | 1 | 0 | 0 | 1 | 0 | 0 | 1 | 5 |
| hsa-miR-708 | GPR88   | 1 | 1 | 0 | 1 | 0 | 0 | 1 | 0 | 0 | 1 | 5 |
| hsa-miR-708 | GPR97   | 1 | 1 | 0 | 1 | 0 | 0 | 1 | 0 | 0 | 1 | 5 |
| hsa-miR-708 | GPRC5A  | 1 | 1 | 0 | 1 | 0 | 0 | 1 | 0 | 0 | 0 | 4 |
| hsa-miR-708 | GREM2   | 1 | 1 | 0 | 1 | 0 | 0 | 1 | 0 | 0 | 1 | 5 |
| hsa-miR-708 | GRHL2   | 1 | 1 | 0 | 1 | 0 | 0 | 1 | 0 | 0 | 1 | 5 |
| hsa-miR-708 | GRIA4   | 1 | 1 | 0 | 1 | 0 | 0 | 1 | 0 | 0 | 1 | 5 |
| hsa-miR-708 | GRIK3   | 0 | 1 | 0 | 1 | 0 | 0 | 1 | 0 | 0 | 1 | 4 |
| hsa-miR-708 | GRIN2B  | 1 | 1 | 0 | 1 | 0 | 0 | 1 | 0 | 0 | 1 | 5 |
| hsa-miR-708 | GRIN3A  | 1 | 1 | 0 | 1 | 0 | 0 | 1 | 0 | 0 | 1 | 5 |
| hsa-miR-708 | GRLF1   | 0 | 1 | 0 | 1 | 0 | 0 | 1 | 0 | 0 | 1 | 4 |
| hsa-miR-708 | GRM1    | 1 | 1 | 0 | 1 | 0 | 0 | 0 | 0 | 0 | 1 | 4 |
| hsa-miR-708 | GRM4    | 1 | 1 | 0 | 1 | 0 | 0 | 1 | 0 | 0 | 1 | 5 |
| hsa-miR-708 | GRSF1   | 0 | 1 | 0 | 1 | 0 | 0 | 1 | 0 | 0 | 1 | 4 |
| hsa-miR-708 | GSG1L   | 1 | 1 | 0 | 1 | 0 | 0 | 1 | 0 | 0 | 0 | 4 |
| hsa-miR-708 | GSK3A   | 1 | 1 | 0 | 1 | 0 | 0 | 1 | 0 | 0 | 1 | 5 |
| hsa-miR-708 | GSTCD   | 1 | 0 | 0 | 1 | 0 | 0 | 1 | 0 | 0 | 1 | 4 |
| hsa-miR-708 | GTF3C1  | 1 | 1 | 0 | 1 | 0 | 0 | 1 | 0 | 0 | 0 | 4 |
| hsa-miR-708 | GTSE1   | 1 | 0 | 0 | 1 | 0 | 0 | 1 | 0 | 0 | 1 | 4 |
| hsa-miR-708 | GUCA2B  | 1 | 1 | 0 | 1 | 0 | 0 | 1 | 0 | 0 | 1 | 5 |
| hsa-miR-708 | GUCY2D  | 1 | 1 | 0 | 1 | 0 | 0 | 1 | 0 | 0 | 0 | 4 |
| hsa-miR-708 | GZF1    | 1 | 1 | 0 | 1 | 0 | 0 | 1 | 0 | 0 | 1 | 5 |
| hsa-miR-708 | H3F3B   | 1 | 1 | 1 | 1 | 0 | 0 | 1 | 0 | 0 | 1 | 6 |

|             |           |   |   |   |   |   |   |   |   |   |   |   |
|-------------|-----------|---|---|---|---|---|---|---|---|---|---|---|
| hsa-miR-708 | HACE1     | 1 | 1 | 1 | 1 | 0 | 0 | 1 | 0 | 0 | 1 | 6 |
| hsa-miR-708 | HADHB     | 1 | 1 | 0 | 1 | 0 | 0 | 1 | 0 | 0 | 1 | 5 |
| hsa-miR-708 | HAPLN4    | 1 | 1 | 0 | 1 | 0 | 0 | 1 | 0 | 0 | 1 | 5 |
| hsa-miR-708 | HBP1      | 1 | 1 | 0 | 1 | 0 | 0 | 1 | 0 | 0 | 1 | 5 |
| hsa-miR-708 | HDGF      | 1 | 1 | 0 | 1 | 0 | 0 | 1 | 0 | 0 | 1 | 5 |
| hsa-miR-708 | HDLBP     | 1 | 0 | 0 | 1 | 0 | 0 | 1 | 0 | 0 | 1 | 4 |
| hsa-miR-708 | HECA      | 1 | 1 | 0 | 1 | 0 | 0 | 1 | 0 | 0 | 1 | 5 |
| hsa-miR-708 | HEG1      | 1 | 1 | 0 | 0 | 0 | 0 | 1 | 0 | 0 | 1 | 4 |
| hsa-miR-708 | HELZ      | 0 | 1 | 0 | 1 | 0 | 0 | 1 | 0 | 0 | 1 | 4 |
| hsa-miR-708 | HEPH      | 1 | 1 | 0 | 1 | 0 | 0 | 0 | 0 | 0 | 1 | 4 |
| hsa-miR-708 | HGSNAT    | 0 | 1 | 0 | 1 | 0 | 0 | 1 | 0 | 0 | 1 | 4 |
| hsa-miR-708 | HHAT      | 1 | 0 | 0 | 1 | 0 | 0 | 1 | 0 | 0 | 1 | 4 |
| hsa-miR-708 | HIF1AN    | 1 | 1 | 0 | 1 | 0 | 0 | 1 | 0 | 0 | 1 | 5 |
| hsa-miR-708 | HIF3A     | 1 | 0 | 0 | 1 | 0 | 0 | 1 | 0 | 0 | 1 | 4 |
| hsa-miR-708 | HIG2      | 1 | 1 | 0 | 1 | 0 | 0 | 0 | 0 | 0 | 1 | 4 |
| hsa-miR-708 | HIPK1     | 1 | 1 | 0 | 1 | 0 | 0 | 1 | 0 | 0 | 1 | 5 |
| hsa-miR-708 | HIPK4     | 1 | 1 | 0 | 1 | 0 | 0 | 1 | 0 | 0 | 0 | 4 |
| hsa-miR-708 | HIST2H2BE | 1 | 1 | 0 | 1 | 0 | 0 | 1 | 0 | 0 | 0 | 4 |
| hsa-miR-708 | HJURP     | 1 | 1 | 0 | 1 | 0 | 0 | 1 | 0 | 0 | 1 | 5 |
| hsa-miR-708 | HK2       | 1 | 1 | 0 | 1 | 0 | 0 | 1 | 0 | 0 | 1 | 5 |
| hsa-miR-708 | HLA-DOA   | 1 | 1 | 0 | 0 | 0 | 0 | 1 | 0 | 0 | 1 | 4 |
| hsa-miR-708 | HLA-DRB1  | 1 | 1 | 0 | 1 | 0 | 0 | 0 | 0 | 0 | 1 | 4 |
| hsa-miR-708 | HMG20B    | 1 | 1 | 0 | 1 | 0 | 0 | 1 | 0 | 0 | 0 | 4 |
| hsa-miR-708 | HMGA1     | 1 | 1 | 0 | 1 | 0 | 0 | 1 | 0 | 0 | 0 | 4 |
| hsa-miR-708 | HMGB3     | 1 | 1 | 0 | 1 | 0 | 0 | 1 | 0 | 0 | 1 | 5 |
| hsa-miR-708 | HMGCLL1   | 1 | 1 | 0 | 1 | 0 | 0 | 1 | 0 | 0 | 1 | 5 |
| hsa-miR-708 | HMP19     | 1 | 1 | 0 | 1 | 0 | 0 | 1 | 0 | 0 | 1 | 5 |
| hsa-miR-708 | HNF1A     | 1 | 1 | 0 | 1 | 0 | 0 | 1 | 0 | 0 | 1 | 5 |
| hsa-miR-708 | HNRPA3    | 1 | 1 | 0 | 1 | 0 | 0 | 1 | 0 | 0 | 0 | 4 |
| hsa-miR-708 | HNRPDL    | 1 | 1 | 0 | 0 | 0 | 0 | 1 | 0 | 0 | 1 | 4 |
| hsa-miR-708 | HNRPK     | 1 | 1 | 0 | 1 | 0 | 0 | 1 | 0 | 0 | 1 | 5 |
| hsa-miR-708 | HNRPUL1   | 1 | 1 | 0 | 1 | 0 | 0 | 1 | 0 | 0 | 0 | 4 |
| hsa-miR-708 | HNT       | 1 | 0 | 0 | 1 | 0 | 0 | 1 | 0 | 0 | 1 | 4 |
| hsa-miR-708 | HOXA1     | 1 | 1 | 1 | 1 | 0 | 0 | 1 | 0 | 0 | 1 | 6 |
| hsa-miR-708 | HOXB2     | 1 | 1 | 0 | 1 | 0 | 0 | 1 | 0 | 0 | 0 | 4 |
| hsa-miR-708 | HOXB3     | 1 | 1 | 1 | 1 | 0 | 0 | 1 | 0 | 0 | 1 | 6 |
| hsa-miR-708 | HOXB4     | 1 | 1 | 0 | 1 | 0 | 0 | 1 | 0 | 0 | 1 | 5 |
| hsa-miR-708 | HOXB9     | 1 | 1 | 0 | 1 | 0 | 0 | 1 | 0 | 0 | 1 | 5 |
| hsa-miR-708 | HOXC10    | 1 | 1 | 0 | 1 | 0 | 0 | 1 | 0 | 0 | 0 | 4 |
| hsa-miR-708 | HPS1      | 1 | 1 | 0 | 0 | 0 | 0 | 1 | 0 | 0 | 1 | 4 |
| hsa-miR-708 | HRH4      | 1 | 1 | 0 | 1 | 0 | 0 | 1 | 0 | 0 | 1 | 5 |
| hsa-miR-708 | HS2ST1    | 1 | 1 | 0 | 1 | 0 | 0 | 1 | 0 | 0 | 1 | 5 |
| hsa-miR-708 | HS6ST3    | 0 | 1 | 0 | 1 | 0 | 0 | 1 | 0 | 0 | 1 | 4 |
| hsa-miR-708 | HSPA12A   | 1 | 1 | 0 | 1 | 0 | 0 | 1 | 0 | 0 | 0 | 4 |

|             |         |   |   |   |   |   |   |   |   |   |   |   |
|-------------|---------|---|---|---|---|---|---|---|---|---|---|---|
| hsa-miR-708 | HSPBP1  | 1 | 1 | 0 | 1 | 0 | 0 | 0 | 0 | 0 | 1 | 4 |
| hsa-miR-708 | HTRA2   | 1 | 1 | 0 | 1 | 0 | 0 | 1 | 0 | 0 | 1 | 5 |
| hsa-miR-708 | HTT     | 1 | 1 | 0 | 1 | 0 | 0 | 1 | 0 | 0 | 1 | 5 |
| hsa-miR-708 | HUNK    | 1 | 1 | 0 | 1 | 0 | 0 | 1 | 0 | 0 | 1 | 5 |
| hsa-miR-708 | HUS1    | 1 | 1 | 0 | 1 | 0 | 0 | 1 | 0 | 0 | 1 | 5 |
| hsa-miR-708 | HYOU1   | 1 | 1 | 0 | 1 | 0 | 0 | 0 | 0 | 0 | 1 | 4 |
| hsa-miR-708 | ICMT    | 1 | 1 | 0 | 1 | 0 | 0 | 1 | 0 | 0 | 1 | 5 |
| hsa-miR-708 | ICOS    | 1 | 1 | 0 | 1 | 0 | 0 | 1 | 0 | 0 | 1 | 5 |
| hsa-miR-708 | ICOSLG  | 1 | 1 | 0 | 0 | 0 | 0 | 1 | 0 | 0 | 1 | 4 |
| hsa-miR-708 | IDI1    | 1 | 1 | 0 | 1 | 0 | 0 | 1 | 0 | 0 | 0 | 4 |
| hsa-miR-708 | IER3IP1 | 1 | 1 | 1 | 1 | 0 | 0 | 1 | 0 | 0 | 1 | 6 |
| hsa-miR-708 | IFIT5   | 1 | 1 | 0 | 1 | 0 | 0 | 1 | 0 | 0 | 1 | 5 |
| hsa-miR-708 | IGF2BP1 | 1 | 1 | 0 | 1 | 0 | 0 | 1 | 0 | 0 | 1 | 5 |
| hsa-miR-708 | IGFBP1  | 1 | 1 | 0 | 1 | 0 | 0 | 1 | 0 | 0 | 1 | 5 |
| hsa-miR-708 | IGSF2   | 1 | 1 | 0 | 1 | 0 | 0 | 1 | 0 | 0 | 1 | 5 |
| hsa-miR-708 | IGSF9B  | 0 | 1 | 1 | 1 | 0 | 0 | 1 | 0 | 0 | 1 | 5 |
| hsa-miR-708 | IHPK1   | 1 | 1 | 0 | 1 | 0 | 0 | 1 | 0 | 0 | 0 | 4 |
| hsa-miR-708 | IKBKB   | 1 | 1 | 1 | 1 | 0 | 0 | 1 | 0 | 0 | 1 | 6 |
| hsa-miR-708 | IKZF1   | 0 | 1 | 0 | 1 | 0 | 0 | 1 | 0 | 0 | 1 | 4 |
| hsa-miR-708 | IKZF4   | 1 | 1 | 1 | 1 | 0 | 0 | 1 | 0 | 0 | 1 | 6 |
| hsa-miR-708 | IL16    | 1 | 1 | 0 | 1 | 0 | 0 | 1 | 0 | 0 | 1 | 5 |
| hsa-miR-708 | IL17RD  | 1 | 1 | 0 | 1 | 0 | 0 | 1 | 0 | 0 | 1 | 5 |
| hsa-miR-708 | IL17RE  | 1 | 1 | 0 | 1 | 0 | 0 | 1 | 0 | 0 | 1 | 5 |
| hsa-miR-708 | IL20RB  | 1 | 1 | 0 | 1 | 0 | 0 | 1 | 0 | 0 | 0 | 4 |
| hsa-miR-708 | ILF3    | 1 | 1 | 0 | 1 | 0 | 0 | 1 | 0 | 0 | 1 | 5 |
| hsa-miR-708 | IMPACT  | 1 | 1 | 0 | 1 | 0 | 0 | 1 | 0 | 0 | 1 | 5 |
| hsa-miR-708 | IMPAD1  | 0 | 1 | 0 | 1 | 0 | 0 | 1 | 0 | 0 | 1 | 4 |
| hsa-miR-708 | IMPDH1  | 1 | 1 | 0 | 1 | 0 | 0 | 1 | 0 | 0 | 1 | 5 |
| hsa-miR-708 | INCENP  | 1 | 1 | 0 | 1 | 0 | 0 | 1 | 0 | 0 | 1 | 5 |
| hsa-miR-708 | INPP5D  | 1 | 0 | 0 | 1 | 0 | 0 | 1 | 0 | 0 | 1 | 4 |
| hsa-miR-708 | INPP5E  | 1 | 1 | 0 | 1 | 0 | 0 | 1 | 0 | 0 | 1 | 5 |
| hsa-miR-708 | INSL3   | 0 | 1 | 0 | 1 | 0 | 0 | 1 | 0 | 0 | 1 | 4 |
| hsa-miR-708 | INSR    | 1 | 1 | 0 | 1 | 0 | 0 | 1 | 0 | 0 | 1 | 5 |
| hsa-miR-708 | IPO9    | 1 | 1 | 0 | 1 | 0 | 0 | 1 | 0 | 0 | 1 | 5 |
| hsa-miR-708 | IPPK    | 1 | 1 | 0 | 1 | 0 | 0 | 1 | 0 | 0 | 1 | 5 |
| hsa-miR-708 | IQGAP1  | 1 | 1 | 1 | 1 | 0 | 0 | 1 | 0 | 0 | 1 | 6 |
| hsa-miR-708 | IQSEC2  | 1 | 1 | 0 | 1 | 0 | 0 | 0 | 0 | 0 | 1 | 4 |
| hsa-miR-708 | ISG20L1 | 1 | 1 | 0 | 1 | 0 | 0 | 1 | 0 | 0 | 0 | 4 |
| hsa-miR-708 | ISLR    | 1 | 1 | 0 | 1 | 0 | 0 | 0 | 0 | 0 | 1 | 4 |
| hsa-miR-708 | ISOC1   | 1 | 1 | 0 | 1 | 0 | 0 | 1 | 0 | 0 | 1 | 5 |
| hsa-miR-708 | ISX     | 1 | 1 | 0 | 1 | 0 | 0 | 1 | 0 | 0 | 1 | 5 |
| hsa-miR-708 | ITGA10  | 1 | 1 | 0 | 0 | 0 | 0 | 1 | 0 | 0 | 1 | 4 |
| hsa-miR-708 | ITGA5   | 1 | 1 | 0 | 0 | 0 | 0 | 1 | 0 | 0 | 1 | 4 |
| hsa-miR-708 | ITGAL   | 1 | 1 | 0 | 1 | 0 | 0 | 1 | 0 | 0 | 1 | 5 |

|             |          |   |   |   |   |   |   |   |   |   |   |   |
|-------------|----------|---|---|---|---|---|---|---|---|---|---|---|
| hsa-miR-708 | ITGB3    | 1 | 1 | 0 | 1 | 0 | 0 | 1 | 0 | 0 | 1 | 5 |
| hsa-miR-708 | ITIH3    | 1 | 1 | 0 | 1 | 0 | 0 | 0 | 0 | 0 | 1 | 4 |
| hsa-miR-708 | ITIH5    | 1 | 1 | 0 | 1 | 0 | 0 | 1 | 0 | 0 | 1 | 5 |
| hsa-miR-708 | ITPKB    | 1 | 1 | 0 | 1 | 0 | 0 | 1 | 0 | 0 | 1 | 5 |
| hsa-miR-708 | ITSN1    | 1 | 1 | 0 | 1 | 0 | 0 | 1 | 0 | 0 | 0 | 4 |
| hsa-miR-708 | IYD      | 1 | 1 | 0 | 1 | 0 | 0 | 1 | 0 | 0 | 1 | 5 |
| hsa-miR-708 | JAGN1    | 1 | 1 | 1 | 1 | 0 | 0 | 1 | 0 | 0 | 1 | 6 |
| hsa-miR-708 | JAK1     | 1 | 1 | 0 | 0 | 0 | 0 | 1 | 0 | 0 | 1 | 4 |
| hsa-miR-708 | JAM3     | 1 | 1 | 0 | 1 | 0 | 0 | 1 | 0 | 0 | 1 | 5 |
| hsa-miR-708 | JARID1C  | 1 | 1 | 0 | 0 | 0 | 0 | 1 | 0 | 0 | 1 | 4 |
| hsa-miR-708 | JMJD1B   | 0 | 1 | 0 | 1 | 0 | 0 | 1 | 0 | 0 | 1 | 4 |
| hsa-miR-708 | JMJD1C   | 1 | 1 | 0 | 1 | 0 | 0 | 1 | 0 | 0 | 1 | 5 |
| hsa-miR-708 | JMJD5    | 1 | 0 | 0 | 1 | 0 | 0 | 1 | 0 | 0 | 1 | 4 |
| hsa-miR-708 | JMJD6    | 0 | 1 | 0 | 1 | 0 | 0 | 1 | 0 | 0 | 1 | 4 |
| hsa-miR-708 | JPH1     | 1 | 1 | 0 | 1 | 0 | 0 | 1 | 0 | 0 | 1 | 5 |
| hsa-miR-708 | JPH2     | 1 | 1 | 0 | 1 | 0 | 0 | 1 | 0 | 0 | 1 | 5 |
| hsa-miR-708 | JRK      | 0 | 1 | 0 | 1 | 0 | 0 | 1 | 0 | 0 | 1 | 4 |
| hsa-miR-708 | JUB      | 1 | 1 | 0 | 0 | 0 | 0 | 1 | 0 | 0 | 1 | 4 |
| hsa-miR-708 | JUP      | 1 | 1 | 0 | 1 | 0 | 0 | 1 | 0 | 0 | 0 | 4 |
| hsa-miR-708 | KAL1     | 1 | 1 | 0 | 0 | 0 | 0 | 1 | 0 | 0 | 1 | 4 |
| hsa-miR-708 | KATNAL1  | 1 | 1 | 0 | 1 | 0 | 0 | 0 | 0 | 0 | 1 | 4 |
| hsa-miR-708 | KBTBD11  | 1 | 1 | 0 | 1 | 0 | 0 | 1 | 0 | 0 | 1 | 5 |
| hsa-miR-708 | KCNA7    | 1 | 1 | 0 | 1 | 0 | 0 | 1 | 0 | 0 | 1 | 5 |
| hsa-miR-708 | KCNC4    | 1 | 1 | 0 | 1 | 0 | 0 | 1 | 0 | 0 | 0 | 4 |
| hsa-miR-708 | KCNE4    | 1 | 1 | 0 | 1 | 0 | 0 | 1 | 0 | 0 | 1 | 5 |
| hsa-miR-708 | KCNH2    | 1 | 1 | 0 | 1 | 0 | 0 | 1 | 0 | 0 | 0 | 4 |
| hsa-miR-708 | KCNH8    | 1 | 1 | 0 | 1 | 0 | 0 | 1 | 0 | 0 | 1 | 5 |
| hsa-miR-708 | KCNJ1    | 1 | 0 | 1 | 1 | 0 | 0 | 1 | 0 | 0 | 1 | 5 |
| hsa-miR-708 | KCNJ12   | 1 | 1 | 0 | 1 | 0 | 0 | 1 | 0 | 0 | 0 | 4 |
| hsa-miR-708 | KCNK5    | 1 | 1 | 0 | 1 | 0 | 0 | 1 | 0 | 0 | 1 | 5 |
| hsa-miR-708 | KCNMA1   | 1 | 1 | 0 | 1 | 0 | 0 | 1 | 0 | 0 | 1 | 5 |
| hsa-miR-708 | KCNS1    | 1 | 1 | 0 | 1 | 0 | 0 | 1 | 0 | 0 | 0 | 4 |
| hsa-miR-708 | KCTD14   | 1 | 1 | 0 | 1 | 0 | 0 | 1 | 0 | 0 | 1 | 5 |
| hsa-miR-708 | KCTD15   | 1 | 1 | 0 | 1 | 0 | 0 | 1 | 0 | 0 | 1 | 5 |
| hsa-miR-708 | KCTD17   | 1 | 1 | 0 | 1 | 0 | 0 | 1 | 0 | 0 | 0 | 4 |
| hsa-miR-708 | KCTD2    | 1 | 1 | 0 | 1 | 0 | 0 | 1 | 0 | 0 | 1 | 5 |
| hsa-miR-708 | KCTD21   | 1 | 1 | 0 | 0 | 0 | 0 | 1 | 0 | 0 | 1 | 4 |
| hsa-miR-708 | KCTD5    | 1 | 1 | 0 | 1 | 0 | 0 | 1 | 0 | 0 | 1 | 5 |
| hsa-miR-708 | KDR      | 1 | 1 | 0 | 1 | 0 | 0 | 1 | 0 | 0 | 0 | 4 |
| hsa-miR-708 | KIAA0152 | 1 | 1 | 0 | 0 | 0 | 0 | 1 | 0 | 0 | 1 | 4 |
| hsa-miR-708 | KIAA0226 | 1 | 1 | 0 | 0 | 0 | 0 | 1 | 0 | 0 | 1 | 4 |
| hsa-miR-708 | KIAA0247 | 1 | 1 | 0 | 1 | 0 | 0 | 1 | 0 | 0 | 1 | 5 |
| hsa-miR-708 | KIAA0265 | 1 | 1 | 0 | 1 | 0 | 0 | 1 | 0 | 0 | 1 | 5 |
| hsa-miR-708 | KIAA0284 | 1 | 1 | 0 | 1 | 0 | 0 | 0 | 0 | 0 | 1 | 4 |

|             |          |   |   |   |   |   |   |   |   |   |   |   |
|-------------|----------|---|---|---|---|---|---|---|---|---|---|---|
| hsa-miR-708 | KIAA0323 | 1 | 1 | 0 | 1 | 0 | 0 | 1 | 0 | 0 | 1 | 5 |
| hsa-miR-708 | KIAA0355 | 1 | 1 | 1 | 1 | 0 | 0 | 1 | 0 | 0 | 1 | 6 |
| hsa-miR-708 | KIAA0427 | 1 | 0 | 0 | 1 | 0 | 0 | 1 | 0 | 0 | 1 | 4 |
| hsa-miR-708 | KIAA0467 | 1 | 1 | 0 | 1 | 0 | 0 | 1 | 0 | 0 | 1 | 5 |
| hsa-miR-708 | KIAA0494 | 1 | 1 | 0 | 1 | 0 | 0 | 1 | 0 | 0 | 1 | 5 |
| hsa-miR-708 | KIAA0513 | 1 | 1 | 0 | 1 | 0 | 0 | 1 | 0 | 0 | 1 | 5 |
| hsa-miR-708 | KIAA0515 | 1 | 1 | 0 | 1 | 0 | 0 | 1 | 0 | 0 | 1 | 5 |
| hsa-miR-708 | KIAA0556 | 1 | 1 | 0 | 1 | 0 | 0 | 1 | 0 | 0 | 1 | 5 |
| hsa-miR-708 | KIAA0652 | 1 | 0 | 0 | 1 | 0 | 0 | 1 | 0 | 0 | 1 | 4 |
| hsa-miR-708 | KIAA0774 | 0 | 1 | 0 | 1 | 0 | 0 | 1 | 0 | 0 | 1 | 4 |
| hsa-miR-708 | KIAA0841 | 0 | 1 | 0 | 1 | 0 | 0 | 1 | 0 | 0 | 1 | 4 |
| hsa-miR-708 | KIAA0888 | 1 | 1 | 0 | 1 | 0 | 0 | 1 | 0 | 0 | 1 | 5 |
| hsa-miR-708 | KIAA1009 | 1 | 1 | 0 | 1 | 0 | 0 | 1 | 0 | 0 | 1 | 5 |
| hsa-miR-708 | KIAA1012 | 0 | 1 | 0 | 1 | 0 | 0 | 1 | 0 | 0 | 1 | 4 |
| hsa-miR-708 | KIAA1045 | 1 | 1 | 0 | 1 | 0 | 0 | 1 | 0 | 0 | 1 | 5 |
| hsa-miR-708 | KIAA1128 | 1 | 1 | 0 | 1 | 0 | 0 | 1 | 0 | 0 | 1 | 5 |
| hsa-miR-708 | KIAA1147 | 1 | 1 | 0 | 1 | 0 | 0 | 1 | 0 | 0 | 1 | 5 |
| hsa-miR-708 | KIAA1199 | 1 | 1 | 0 | 1 | 0 | 0 | 1 | 0 | 0 | 1 | 5 |
| hsa-miR-708 | KIAA1211 | 1 | 1 | 0 | 1 | 0 | 0 | 1 | 0 | 0 | 1 | 5 |
| hsa-miR-708 | KIAA1303 | 1 | 1 | 0 | 1 | 0 | 0 | 1 | 0 | 0 | 1 | 5 |
| hsa-miR-708 | KIAA1377 | 1 | 1 | 0 | 1 | 0 | 0 | 1 | 0 | 0 | 0 | 4 |
| hsa-miR-708 | KIAA1430 | 0 | 1 | 0 | 1 | 0 | 0 | 1 | 0 | 0 | 1 | 4 |
| hsa-miR-708 | KIAA1467 | 1 | 1 | 0 | 1 | 0 | 0 | 1 | 0 | 0 | 0 | 4 |
| hsa-miR-708 | KIAA1522 | 1 | 1 | 0 | 0 | 0 | 0 | 1 | 0 | 0 | 1 | 4 |
| hsa-miR-708 | KIAA1553 | 1 | 1 | 0 | 0 | 0 | 0 | 1 | 0 | 0 | 1 | 4 |
| hsa-miR-708 | KIAA1576 | 1 | 1 | 0 | 1 | 0 | 0 | 1 | 0 | 0 | 1 | 5 |
| hsa-miR-708 | KIAA1632 | 1 | 1 | 0 | 1 | 0 | 0 | 1 | 0 | 0 | 1 | 5 |
| hsa-miR-708 | KIAA1715 | 1 | 1 | 1 | 1 | 0 | 0 | 1 | 0 | 0 | 1 | 6 |
| hsa-miR-708 | KIAA1737 | 1 | 1 | 0 | 1 | 0 | 0 | 1 | 0 | 0 | 1 | 5 |
| hsa-miR-708 | KIAA1751 | 1 | 1 | 0 | 1 | 0 | 0 | 1 | 0 | 0 | 1 | 5 |
| hsa-miR-708 | KIF1A    | 1 | 1 | 0 | 0 | 0 | 0 | 1 | 0 | 0 | 1 | 4 |
| hsa-miR-708 | KIF1B    | 1 | 1 | 0 | 1 | 0 | 0 | 1 | 0 | 0 | 1 | 5 |
| hsa-miR-708 | KIF21B   | 1 | 1 | 0 | 1 | 0 | 0 | 1 | 0 | 0 | 0 | 4 |
| hsa-miR-708 | KIF3B    | 1 | 1 | 0 | 1 | 0 | 0 | 1 | 0 | 0 | 0 | 4 |
| hsa-miR-708 | KIF3C    | 1 | 1 | 0 | 1 | 0 | 0 | 1 | 0 | 0 | 1 | 5 |
| hsa-miR-708 | KIF6     | 1 | 1 | 0 | 1 | 0 | 0 | 1 | 0 | 0 | 1 | 5 |
| hsa-miR-708 | KL       | 1 | 1 | 0 | 1 | 0 | 0 | 1 | 0 | 0 | 0 | 4 |
| hsa-miR-708 | KLF17    | 1 | 1 | 0 | 1 | 0 | 0 | 1 | 0 | 0 | 1 | 5 |
| hsa-miR-708 | KLHDC3   | 1 | 1 | 0 | 1 | 0 | 0 | 1 | 0 | 0 | 0 | 4 |
| hsa-miR-708 | KLHDC8A  | 1 | 1 | 0 | 0 | 0 | 0 | 1 | 0 | 0 | 1 | 4 |
| hsa-miR-708 | KLHDC8B  | 1 | 1 | 0 | 1 | 0 | 0 | 1 | 0 | 0 | 0 | 4 |
| hsa-miR-708 | KLHL18   | 1 | 1 | 0 | 1 | 0 | 0 | 1 | 0 | 0 | 1 | 5 |
| hsa-miR-708 | KLHL21   | 1 | 1 | 0 | 1 | 0 | 0 | 1 | 0 | 0 | 1 | 5 |
| hsa-miR-708 | KLHL25   | 1 | 1 | 0 | 1 | 0 | 0 | 1 | 0 | 0 | 1 | 5 |

|             |          |   |   |   |   |   |   |   |   |   |   |   |
|-------------|----------|---|---|---|---|---|---|---|---|---|---|---|
| hsa-miR-708 | KLHL26   | 1 | 1 | 0 | 1 | 0 | 0 | 1 | 0 | 0 | 0 | 4 |
| hsa-miR-708 | KLHL6    | 1 | 1 | 0 | 1 | 0 | 0 | 1 | 0 | 0 | 0 | 4 |
| hsa-miR-708 | KLK11    | 1 | 1 | 0 | 1 | 0 | 0 | 1 | 0 | 0 | 1 | 5 |
| hsa-miR-708 | KLK13    | 1 | 1 | 0 | 1 | 0 | 0 | 1 | 0 | 0 | 0 | 4 |
| hsa-miR-708 | KNDC1    | 1 | 1 | 0 | 1 | 0 | 0 | 1 | 0 | 0 | 1 | 5 |
| hsa-miR-708 | KPNA6    | 1 | 1 | 0 | 1 | 0 | 0 | 1 | 0 | 0 | 1 | 5 |
| hsa-miR-708 | KPNB1    | 1 | 1 | 0 | 0 | 0 | 0 | 1 | 0 | 0 | 1 | 4 |
| hsa-miR-708 | KREMEN1  | 1 | 1 | 0 | 1 | 0 | 0 | 1 | 0 | 0 | 1 | 5 |
| hsa-miR-708 | KRT1     | 1 | 1 | 0 | 1 | 0 | 0 | 1 | 0 | 0 | 1 | 5 |
| hsa-miR-708 | KRT2     | 1 | 1 | 0 | 1 | 0 | 0 | 1 | 0 | 0 | 1 | 5 |
| hsa-miR-708 | KRT32    | 1 | 1 | 0 | 1 | 0 | 0 | 1 | 0 | 0 | 0 | 4 |
| hsa-miR-708 | KRT6B    | 1 | 1 | 0 | 1 | 0 | 0 | 1 | 0 | 0 | 1 | 5 |
| hsa-miR-708 | KRT80    | 1 | 1 | 0 | 1 | 0 | 0 | 1 | 0 | 0 | 1 | 5 |
| hsa-miR-708 | KRT82    | 1 | 1 | 0 | 1 | 0 | 0 | 1 | 0 | 0 | 1 | 5 |
| hsa-miR-708 | KRTAP4-4 | 1 | 1 | 0 | 1 | 0 | 0 | 1 | 0 | 0 | 1 | 5 |
| hsa-miR-708 | KRTAP5-9 | 0 | 1 | 0 | 1 | 0 | 0 | 1 | 0 | 0 | 1 | 4 |
| hsa-miR-708 | KSR2     | 0 | 1 | 0 | 1 | 0 | 0 | 1 | 0 | 0 | 1 | 4 |
| hsa-miR-708 | KY       | 1 | 1 | 0 | 1 | 0 | 0 | 1 | 0 | 0 | 1 | 5 |
| hsa-miR-708 | L2HGDH   | 1 | 1 | 0 | 1 | 0 | 0 | 1 | 0 | 0 | 1 | 5 |
| hsa-miR-708 | LAD1     | 1 | 1 | 0 | 1 | 0 | 0 | 1 | 0 | 0 | 1 | 5 |
| hsa-miR-708 | LAIR1    | 1 | 1 | 0 | 1 | 0 | 0 | 1 | 0 | 0 | 1 | 5 |
| hsa-miR-708 | LAMP2    | 1 | 1 | 0 | 1 | 0 | 0 | 0 | 0 | 0 | 1 | 4 |
| hsa-miR-708 | LARP1    | 0 | 1 | 0 | 1 | 0 | 0 | 1 | 0 | 0 | 1 | 4 |
| hsa-miR-708 | LASP1    | 1 | 1 | 0 | 1 | 0 | 0 | 1 | 0 | 0 | 1 | 5 |
| hsa-miR-708 | LBH      | 1 | 1 | 0 | 1 | 0 | 0 | 1 | 0 | 0 | 1 | 5 |
| hsa-miR-708 | LCE3D    | 1 | 1 | 0 | 1 | 0 | 0 | 1 | 0 | 0 | 1 | 5 |
| hsa-miR-708 | LDB3     | 1 | 1 | 0 | 1 | 0 | 0 | 1 | 0 | 0 | 1 | 5 |
| hsa-miR-708 | LDLRAP1  | 1 | 1 | 0 | 1 | 0 | 0 | 1 | 0 | 0 | 1 | 5 |
| hsa-miR-708 | LDOC1    | 1 | 1 | 0 | 1 | 0 | 0 | 1 | 0 | 0 | 1 | 5 |
| hsa-miR-708 | LDOC1L   | 1 | 1 | 0 | 1 | 0 | 0 | 1 | 0 | 0 | 1 | 5 |
| hsa-miR-708 | LEMD2    | 1 | 1 | 0 | 1 | 0 | 0 | 1 | 0 | 0 | 1 | 5 |
| hsa-miR-708 | LEPREL2  | 1 | 0 | 0 | 1 | 0 | 0 | 1 | 0 | 0 | 1 | 4 |
| hsa-miR-708 | LETM1    | 1 | 1 | 0 | 1 | 0 | 0 | 1 | 0 | 0 | 0 | 4 |
| hsa-miR-708 | LGALS9   | 1 | 1 | 0 | 1 | 0 | 0 | 1 | 0 | 0 | 0 | 4 |
| hsa-miR-708 | LGI2     | 1 | 1 | 0 | 1 | 0 | 0 | 1 | 0 | 0 | 1 | 5 |
| hsa-miR-708 | LGI3     | 1 | 1 | 0 | 1 | 0 | 0 | 1 | 0 | 0 | 0 | 4 |
| hsa-miR-708 | LIF      | 1 | 1 | 0 | 1 | 0 | 0 | 1 | 0 | 0 | 1 | 5 |
| hsa-miR-708 | LIFR     | 1 | 1 | 0 | 1 | 0 | 0 | 0 | 0 | 0 | 1 | 4 |
| hsa-miR-708 | LIMD1    | 1 | 1 | 0 | 1 | 0 | 0 | 1 | 0 | 0 | 1 | 5 |
| hsa-miR-708 | LIMD2    | 1 | 1 | 0 | 1 | 0 | 0 | 1 | 0 | 0 | 1 | 5 |
| hsa-miR-708 | LIMK2    | 1 | 1 | 0 | 1 | 0 | 0 | 0 | 0 | 0 | 1 | 4 |
| hsa-miR-708 | LMBR1    | 1 | 1 | 0 | 1 | 0 | 0 | 1 | 0 | 0 | 1 | 5 |
| hsa-miR-708 | LMCD1    | 1 | 1 | 0 | 1 | 0 | 0 | 1 | 0 | 0 | 1 | 5 |
| hsa-miR-708 | LMOD3    | 0 | 1 | 0 | 1 | 0 | 0 | 1 | 0 | 0 | 1 | 4 |

|                       |   |   |   |   |   |   |   |   |   |   |   |
|-----------------------|---|---|---|---|---|---|---|---|---|---|---|
| hsa-miR-708 LOC129881 | 0 | 1 | 0 | 1 | 0 | 0 | 1 | 0 | 0 | 1 | 4 |
| hsa-miR-708 LOC137886 | 1 | 1 | 0 | 1 | 0 | 0 | 1 | 0 | 0 | 1 | 5 |
| hsa-miR-708 LOC150383 | 1 | 1 | 0 | 1 | 0 | 0 | 1 | 0 | 0 | 1 | 5 |
| hsa-miR-708 LOC155006 | 1 | 1 | 0 | 1 | 0 | 0 | 1 | 0 | 0 | 1 | 5 |
| hsa-miR-708 LOC196415 | 0 | 1 | 0 | 1 | 0 | 0 | 1 | 0 | 0 | 1 | 4 |
| hsa-miR-708 LOC201164 | 1 | 1 | 0 | 1 | 0 | 0 | 1 | 0 | 0 | 0 | 4 |
| hsa-miR-708 LOC283514 | 1 | 1 | 0 | 1 | 0 | 0 | 1 | 0 | 0 | 1 | 5 |
| hsa-miR-708 LOC283871 | 1 | 1 | 0 | 1 | 0 | 0 | 1 | 0 | 0 | 0 | 4 |
| hsa-miR-708 LOC285382 | 1 | 1 | 0 | 1 | 0 | 0 | 1 | 0 | 0 | 0 | 4 |
| hsa-miR-708 LOC285636 | 1 | 1 | 0 | 1 | 0 | 0 | 1 | 0 | 0 | 0 | 4 |
| hsa-miR-708 LOC388610 | 0 | 1 | 0 | 1 | 0 | 0 | 1 | 0 | 0 | 1 | 4 |
| hsa-miR-708 LOC400120 | 1 | 1 | 0 | 1 | 0 | 0 | 1 | 0 | 0 | 1 | 5 |
| hsa-miR-708 LOC400451 | 1 | 1 | 0 | 1 | 0 | 0 | 1 | 0 | 0 | 0 | 4 |
| hsa-miR-708 LOC401052 | 0 | 1 | 0 | 1 | 0 | 0 | 1 | 0 | 0 | 1 | 4 |
| hsa-miR-708 LOC63920  | 0 | 1 | 0 | 1 | 0 | 0 | 1 | 0 | 0 | 1 | 4 |
| hsa-miR-708 LOC653319 | 1 | 1 | 0 | 1 | 0 | 0 | 1 | 0 | 0 | 1 | 5 |
| hsa-miR-708 LOC729830 | 0 | 1 | 0 | 1 | 0 | 0 | 1 | 0 | 0 | 1 | 4 |
| hsa-miR-708 LOC751071 | 1 | 1 | 0 | 1 | 0 | 0 | 1 | 0 | 0 | 1 | 5 |
| hsa-miR-708 LONRF2    | 1 | 1 | 0 | 1 | 0 | 0 | 1 | 0 | 0 | 0 | 4 |
| hsa-miR-708 LOXL2     | 1 | 1 | 0 | 0 | 0 | 0 | 1 | 0 | 0 | 1 | 4 |
| hsa-miR-708 LOXL4     | 1 | 1 | 0 | 1 | 0 | 0 | 1 | 0 | 0 | 1 | 5 |
| hsa-miR-708 LPHN1     | 1 | 1 | 1 | 1 | 0 | 0 | 1 | 0 | 0 | 1 | 6 |
| hsa-miR-708 LPIN2     | 1 | 1 | 0 | 1 | 0 | 0 | 1 | 0 | 0 | 1 | 5 |
| hsa-miR-708 LPIN3     | 1 | 1 | 0 | 1 | 0 | 0 | 1 | 0 | 0 | 0 | 4 |
| hsa-miR-708 LPL       | 1 | 1 | 0 | 1 | 0 | 0 | 1 | 0 | 0 | 0 | 4 |
| hsa-miR-708 LRIT1     | 1 | 1 | 0 | 1 | 0 | 0 | 1 | 0 | 0 | 0 | 4 |
| hsa-miR-708 LRP1      | 1 | 1 | 0 | 1 | 0 | 0 | 1 | 0 | 0 | 1 | 5 |
| hsa-miR-708 LRRC1     | 1 | 1 | 0 | 1 | 0 | 0 | 1 | 0 | 0 | 0 | 4 |
| hsa-miR-708 LRRC14    | 1 | 1 | 0 | 1 | 0 | 0 | 1 | 0 | 0 | 0 | 4 |
| hsa-miR-708 LRRC15    | 1 | 1 | 0 | 1 | 0 | 0 | 1 | 0 | 0 | 1 | 5 |
| hsa-miR-708 LRRC25    | 1 | 1 | 0 | 1 | 0 | 0 | 1 | 0 | 0 | 1 | 5 |
| hsa-miR-708 LRRC27    | 1 | 1 | 0 | 1 | 0 | 0 | 1 | 0 | 0 | 1 | 5 |
| hsa-miR-708 LRRC59    | 1 | 1 | 0 | 1 | 0 | 0 | 1 | 0 | 0 | 1 | 5 |
| hsa-miR-708 LRRC61    | 0 | 1 | 0 | 1 | 0 | 0 | 1 | 0 | 0 | 1 | 4 |
| hsa-miR-708 LRRFIP2   | 1 | 1 | 0 | 1 | 0 | 0 | 1 | 0 | 0 | 0 | 4 |
| hsa-miR-708 LRRK1     | 1 | 1 | 0 | 1 | 0 | 0 | 1 | 0 | 0 | 0 | 4 |
| hsa-miR-708 LRRK2     | 1 | 1 | 0 | 0 | 0 | 0 | 1 | 0 | 0 | 1 | 4 |
| hsa-miR-708 LRRTM1    | 1 | 1 | 0 | 1 | 0 | 0 | 1 | 0 | 0 | 0 | 4 |
| hsa-miR-708 LRTM2     | 1 | 0 | 0 | 1 | 0 | 0 | 1 | 0 | 0 | 1 | 4 |
| hsa-miR-708 LTBR      | 1 | 1 | 0 | 1 | 0 | 0 | 1 | 0 | 0 | 0 | 4 |
| hsa-miR-708 LY86      | 1 | 1 | 0 | 1 | 0 | 0 | 1 | 0 | 0 | 1 | 5 |
| hsa-miR-708 LYK5      | 1 | 1 | 0 | 1 | 0 | 0 | 1 | 0 | 0 | 0 | 4 |
| hsa-miR-708 LYPD3     | 1 | 1 | 0 | 1 | 0 | 0 | 1 | 0 | 0 | 1 | 5 |
| hsa-miR-708 LYPLA3    | 1 | 1 | 0 | 1 | 0 | 0 | 1 | 0 | 0 | 1 | 5 |

|             |          |   |   |   |   |   |   |   |   |   |   |   |
|-------------|----------|---|---|---|---|---|---|---|---|---|---|---|
| hsa-miR-708 | LYRM2    | 0 | 1 | 0 | 1 | 0 | 0 | 1 | 0 | 0 | 1 | 4 |
| hsa-miR-708 | LYVE1    | 1 | 1 | 0 | 1 | 0 | 0 | 1 | 0 | 0 | 1 | 5 |
| hsa-miR-708 | LZTR1    | 1 | 1 | 0 | 1 | 0 | 0 | 1 | 0 | 0 | 1 | 5 |
| hsa-miR-708 | MACROD2  | 1 | 1 | 0 | 1 | 0 | 0 | 1 | 0 | 0 | 1 | 5 |
| hsa-miR-708 | MAD2L1   | 1 | 1 | 0 | 1 | 0 | 0 | 1 | 0 | 0 | 1 | 5 |
| hsa-miR-708 | MAFF     | 1 | 0 | 0 | 1 | 0 | 0 | 1 | 0 | 0 | 1 | 4 |
| hsa-miR-708 | MAFG     | 1 | 0 | 0 | 1 | 0 | 0 | 1 | 0 | 0 | 1 | 4 |
| hsa-miR-708 | MAFK     | 1 | 1 | 0 | 1 | 0 | 0 | 1 | 0 | 0 | 0 | 4 |
| hsa-miR-708 | MAML1    | 1 | 1 | 0 | 1 | 0 | 0 | 1 | 0 | 0 | 1 | 5 |
| hsa-miR-708 | MAML3    | 0 | 1 | 0 | 1 | 0 | 0 | 1 | 0 | 0 | 1 | 4 |
| hsa-miR-708 | MANEAL   | 1 | 1 | 0 | 1 | 0 | 0 | 0 | 0 | 0 | 1 | 4 |
| hsa-miR-708 | MAP1A    | 1 | 1 | 0 | 1 | 0 | 0 | 1 | 0 | 0 | 1 | 5 |
| hsa-miR-708 | MAP1B    | 1 | 1 | 0 | 1 | 0 | 0 | 1 | 0 | 0 | 1 | 5 |
| hsa-miR-708 | MAP1LC3A | 1 | 1 | 0 | 1 | 0 | 0 | 1 | 0 | 0 | 1 | 5 |
| hsa-miR-708 | MAP3K2   | 1 | 1 | 0 | 1 | 0 | 0 | 1 | 0 | 0 | 1 | 5 |
| hsa-miR-708 | MAP7     | 1 | 1 | 0 | 1 | 0 | 0 | 1 | 0 | 0 | 1 | 5 |
| hsa-miR-708 | MAPK1    | 1 | 1 | 0 | 1 | 0 | 0 | 1 | 0 | 0 | 1 | 5 |
| hsa-miR-708 | MAPK4    | 1 | 1 | 0 | 1 | 0 | 0 | 1 | 0 | 0 | 1 | 5 |
| hsa-miR-708 | MAPK8IP3 | 1 | 1 | 0 | 1 | 0 | 0 | 1 | 0 | 0 | 1 | 5 |
| hsa-miR-708 | MAPRE1   | 1 | 1 | 0 | 1 | 0 | 0 | 1 | 0 | 0 | 0 | 4 |
| hsa-miR-708 | MARK4    | 1 | 1 | 0 | 1 | 0 | 0 | 1 | 0 | 0 | 1 | 5 |
| hsa-miR-708 | MASP1    | 1 | 1 | 0 | 1 | 0 | 0 | 1 | 0 | 0 | 1 | 5 |
| hsa-miR-708 | MAT1A    | 1 | 1 | 0 | 1 | 0 | 0 | 1 | 0 | 0 | 1 | 5 |
| hsa-miR-708 | MAT2A    | 1 | 1 | 0 | 1 | 0 | 0 | 1 | 0 | 0 | 1 | 5 |
| hsa-miR-708 | MAX      | 1 | 1 | 0 | 1 | 0 | 0 | 1 | 0 | 0 | 1 | 5 |
| hsa-miR-708 | MAZ      | 1 | 1 | 0 | 1 | 0 | 0 | 1 | 0 | 0 | 1 | 5 |
| hsa-miR-708 | MBD3     | 1 | 1 | 0 | 1 | 0 | 0 | 1 | 0 | 0 | 1 | 5 |
| hsa-miR-708 | MBP      | 1 | 1 | 0 | 1 | 0 | 0 | 1 | 0 | 0 | 0 | 4 |
| hsa-miR-708 | MCART6   | 1 | 1 | 0 | 1 | 0 | 0 | 1 | 0 | 0 | 0 | 4 |
| hsa-miR-708 | MCAT     | 1 | 1 | 0 | 1 | 0 | 0 | 1 | 0 | 0 | 1 | 5 |
| hsa-miR-708 | MCC      | 1 | 1 | 0 | 1 | 0 | 0 | 1 | 0 | 0 | 1 | 5 |
| hsa-miR-708 | MCM9     | 0 | 1 | 0 | 1 | 0 | 0 | 1 | 0 | 0 | 1 | 4 |
| hsa-miR-708 | MDGA1    | 1 | 1 | 0 | 1 | 0 | 0 | 1 | 0 | 0 | 1 | 5 |
| hsa-miR-708 | MED19    | 1 | 1 | 0 | 1 | 0 | 0 | 1 | 0 | 0 | 1 | 5 |
| hsa-miR-708 | MED22    | 1 | 1 | 0 | 1 | 0 | 0 | 1 | 0 | 0 | 1 | 5 |
| hsa-miR-708 | MED24    | 1 | 1 | 0 | 1 | 0 | 0 | 1 | 0 | 0 | 1 | 5 |
| hsa-miR-708 | MED29    | 1 | 1 | 0 | 1 | 0 | 0 | 1 | 0 | 0 | 1 | 5 |
| hsa-miR-708 | MED9     | 1 | 1 | 0 | 1 | 0 | 0 | 1 | 0 | 0 | 1 | 5 |
| hsa-miR-708 | MEF2C    | 1 | 1 | 0 | 1 | 0 | 0 | 1 | 0 | 0 | 0 | 4 |
| hsa-miR-708 | MEF2D    | 1 | 1 | 0 | 1 | 0 | 0 | 1 | 0 | 0 | 1 | 5 |
| hsa-miR-708 | MEGF6    | 1 | 1 | 0 | 0 | 0 | 0 | 1 | 0 | 0 | 1 | 4 |
| hsa-miR-708 | MEGF8    | 0 | 1 | 0 | 1 | 0 | 0 | 1 | 0 | 0 | 1 | 4 |
| hsa-miR-708 | MEN1     | 1 | 1 | 0 | 1 | 0 | 0 | 0 | 0 | 0 | 1 | 4 |
| hsa-miR-708 | MEOX2    | 1 | 1 | 0 | 1 | 0 | 0 | 1 | 0 | 0 | 1 | 5 |



|             |          |   |   |   |   |   |   |   |   |   |   |   |
|-------------|----------|---|---|---|---|---|---|---|---|---|---|---|
| hsa-miR-708 | MERTK    | 1 | 1 | 0 | 1 | 0 | 0 | 1 | 0 | 0 | 0 | 4 |
| hsa-miR-708 | MESDC2   | 1 | 1 | 0 | 1 | 0 | 0 | 1 | 0 | 0 | 1 | 5 |
| hsa-miR-708 | MEST     | 1 | 1 | 0 | 1 | 0 | 0 | 1 | 0 | 0 | 1 | 5 |
| hsa-miR-708 | METAP2   | 1 | 1 | 0 | 1 | 0 | 0 | 1 | 0 | 0 | 1 | 5 |
| hsa-miR-708 | METT10D  | 1 | 1 | 0 | 1 | 0 | 0 | 1 | 0 | 0 | 1 | 5 |
| hsa-miR-708 | METTL7B  | 1 | 1 | 0 | 1 | 0 | 0 | 1 | 0 | 0 | 1 | 5 |
| hsa-miR-708 | METTL8   | 1 | 1 | 0 | 1 | 0 | 0 | 1 | 0 | 0 | 1 | 5 |
| hsa-miR-708 | MFAP3L   | 1 | 1 | 0 | 1 | 0 | 0 | 1 | 0 | 0 | 1 | 5 |
| hsa-miR-708 | MFNG     | 1 | 1 | 0 | 1 | 0 | 0 | 1 | 0 | 0 | 1 | 5 |
| hsa-miR-708 | MFRP     | 0 | 1 | 0 | 1 | 0 | 0 | 1 | 0 | 0 | 1 | 4 |
| hsa-miR-708 | MFSD10   | 1 | 0 | 0 | 1 | 0 | 0 | 1 | 0 | 0 | 1 | 4 |
| hsa-miR-708 | MFSD4    | 1 | 1 | 0 | 1 | 0 | 0 | 1 | 0 | 0 | 1 | 5 |
| hsa-miR-708 | MFSD7    | 1 | 1 | 0 | 1 | 0 | 0 | 1 | 0 | 0 | 0 | 4 |
| hsa-miR-708 | MGC13057 | 1 | 0 | 0 | 1 | 0 | 0 | 1 | 0 | 0 | 1 | 4 |
| hsa-miR-708 | MGC13379 | 0 | 1 | 0 | 1 | 0 | 0 | 1 | 0 | 0 | 1 | 4 |
| hsa-miR-708 | MGC24039 | 1 | 1 | 0 | 1 | 0 | 0 | 1 | 0 | 0 | 1 | 5 |
| hsa-miR-708 | MGC4655  | 0 | 1 | 0 | 1 | 0 | 0 | 1 | 0 | 0 | 1 | 4 |
| hsa-miR-708 | MGLL     | 1 | 1 | 0 | 1 | 0 | 0 | 0 | 0 | 0 | 1 | 4 |
| hsa-miR-708 | MICALL1  | 1 | 1 | 0 | 1 | 0 | 0 | 1 | 0 | 0 | 1 | 5 |
| hsa-miR-708 | MIOX     | 1 | 1 | 0 | 1 | 0 | 0 | 1 | 0 | 0 | 1 | 5 |
| hsa-miR-708 | MIS12    | 1 | 1 | 0 | 1 | 0 | 0 | 1 | 0 | 0 | 0 | 4 |
| hsa-miR-708 | MKL1     | 1 | 1 | 0 | 1 | 0 | 0 | 1 | 0 | 0 | 0 | 4 |
| hsa-miR-708 | MKLN1    | 1 | 1 | 0 | 0 | 0 | 0 | 1 | 0 | 0 | 1 | 4 |
| hsa-miR-708 | MLC1     | 1 | 0 | 0 | 1 | 0 | 0 | 1 | 0 | 0 | 1 | 4 |
| hsa-miR-708 | MLKL     | 1 | 1 | 0 | 1 | 0 | 0 | 1 | 0 | 0 | 1 | 5 |
| hsa-miR-708 | MLL      | 1 | 1 | 0 | 1 | 0 | 0 | 1 | 0 | 0 | 1 | 5 |
| hsa-miR-708 | MLLT6    | 1 | 1 | 0 | 0 | 0 | 0 | 1 | 0 | 0 | 1 | 4 |
| hsa-miR-708 | MLX      | 1 | 1 | 0 | 0 | 0 | 0 | 1 | 0 | 0 | 1 | 4 |
| hsa-miR-708 | MMP14    | 1 | 1 | 0 | 1 | 0 | 0 | 1 | 0 | 0 | 0 | 4 |
| hsa-miR-708 | MMP15    | 1 | 1 | 0 | 1 | 0 | 0 | 1 | 0 | 0 | 1 | 5 |
| hsa-miR-708 | MMP19    | 1 | 1 | 0 | 1 | 0 | 0 | 1 | 0 | 0 | 1 | 5 |
| hsa-miR-708 | MOBKL1A  | 1 | 1 | 0 | 1 | 0 | 0 | 1 | 0 | 0 | 0 | 4 |
| hsa-miR-708 | MOBKL2B  | 1 | 1 | 1 | 0 | 0 | 0 | 1 | 0 | 0 | 1 | 5 |
| hsa-miR-708 | MOBP     | 1 | 1 | 0 | 1 | 0 | 0 | 1 | 0 | 0 | 1 | 5 |
| hsa-miR-708 | MOCS1    | 1 | 1 | 0 | 1 | 0 | 0 | 1 | 0 | 0 | 0 | 4 |
| hsa-miR-708 | MOG      | 1 | 1 | 0 | 1 | 0 | 0 | 0 | 0 | 0 | 1 | 4 |
| hsa-miR-708 | MORF4L1  | 1 | 1 | 0 | 1 | 0 | 0 | 1 | 0 | 0 | 1 | 5 |
| hsa-miR-708 | MORF4L2  | 1 | 0 | 1 | 1 | 0 | 0 | 1 | 0 | 0 | 1 | 5 |
| hsa-miR-708 | MOSC1    | 1 | 1 | 0 | 1 | 0 | 0 | 1 | 0 | 0 | 0 | 4 |
| hsa-miR-708 | MPL      | 1 | 1 | 0 | 1 | 0 | 0 | 1 | 0 | 0 | 1 | 5 |
| hsa-miR-708 | MPP2     | 1 | 1 | 0 | 1 | 0 | 0 | 1 | 0 | 0 | 1 | 5 |
| hsa-miR-708 | MRC2     | 1 | 1 | 0 | 1 | 0 | 0 | 1 | 0 | 0 | 1 | 5 |
| hsa-miR-708 | MRE11A   | 1 | 0 | 1 | 1 | 0 | 0 | 1 | 0 | 0 | 1 | 5 |
| hsa-miR-708 | MRGPRF   | 1 | 1 | 0 | 1 | 0 | 0 | 0 | 0 | 0 | 1 | 4 |

|             |        |   |   |   |   |   |   |   |   |   |   |   |
|-------------|--------|---|---|---|---|---|---|---|---|---|---|---|
| hsa-miR-708 | MRPL11 | 1 | 1 | 0 | 1 | 0 | 0 | 0 | 0 | 0 | 1 | 4 |
| hsa-miR-708 | MRPL17 | 1 | 1 | 0 | 1 | 0 | 0 | 0 | 0 | 0 | 1 | 4 |
| hsa-miR-708 | MRPL28 | 0 | 1 | 0 | 1 | 0 | 0 | 1 | 0 | 0 | 1 | 4 |
| hsa-miR-708 | MRPL35 | 1 | 1 | 0 | 1 | 0 | 0 | 1 | 0 | 0 | 1 | 5 |
| hsa-miR-708 | MRPL4  | 1 | 1 | 0 | 1 | 0 | 0 | 1 | 0 | 0 | 0 | 4 |
| hsa-miR-708 | MS4A1  | 1 | 1 | 0 | 1 | 0 | 0 | 0 | 0 | 0 | 1 | 4 |
| hsa-miR-708 | MSL2L1 | 1 | 1 | 0 | 1 | 0 | 0 | 1 | 0 | 0 | 1 | 5 |
| hsa-miR-708 | MSL3L1 | 1 | 1 | 0 | 1 | 0 | 0 | 1 | 0 | 0 | 1 | 5 |
| hsa-miR-708 | MSN    | 1 | 1 | 0 | 1 | 0 | 0 | 1 | 0 | 0 | 1 | 5 |
| hsa-miR-708 | MST150 | 1 | 1 | 0 | 0 | 0 | 0 | 1 | 0 | 0 | 1 | 4 |
| hsa-miR-708 | MTCP1  | 1 | 1 | 1 | 1 | 0 | 0 | 1 | 0 | 0 | 1 | 6 |
| hsa-miR-708 | MTF1   | 1 | 1 | 0 | 1 | 0 | 0 | 1 | 0 | 0 | 1 | 5 |
| hsa-miR-708 | MTHFR  | 1 | 1 | 0 | 1 | 0 | 0 | 1 | 0 | 0 | 1 | 5 |
| hsa-miR-708 | MTMR3  | 1 | 1 | 0 | 1 | 0 | 0 | 1 | 0 | 0 | 1 | 5 |
| hsa-miR-708 | MTSS1  | 1 | 1 | 1 | 1 | 0 | 0 | 1 | 0 | 0 | 1 | 6 |
| hsa-miR-708 | MUM1L1 | 1 | 1 | 0 | 1 | 0 | 0 | 1 | 0 | 0 | 1 | 5 |
| hsa-miR-708 | MVK    | 1 | 0 | 0 | 1 | 0 | 0 | 1 | 0 | 0 | 1 | 4 |
| hsa-miR-708 | MXD1   | 1 | 1 | 0 | 1 | 0 | 0 | 1 | 0 | 0 | 0 | 4 |
| hsa-miR-708 | MXD4   | 1 | 1 | 0 | 1 | 0 | 0 | 1 | 0 | 0 | 1 | 5 |
| hsa-miR-708 | MYCL1  | 1 | 0 | 0 | 1 | 0 | 0 | 1 | 0 | 0 | 1 | 4 |
| hsa-miR-708 | MYEOV  | 1 | 1 | 0 | 1 | 0 | 0 | 1 | 0 | 0 | 1 | 5 |
| hsa-miR-708 | MYH15  | 1 | 1 | 0 | 1 | 0 | 0 | 1 | 0 | 0 | 1 | 5 |
| hsa-miR-708 | MYH7   | 1 | 1 | 0 | 1 | 0 | 0 | 1 | 0 | 0 | 1 | 5 |
| hsa-miR-708 | MYLK2  | 1 | 1 | 0 | 1 | 0 | 0 | 1 | 0 | 0 | 1 | 5 |
| hsa-miR-708 | MYO16  | 1 | 1 | 0 | 1 | 0 | 0 | 1 | 0 | 0 | 1 | 5 |
| hsa-miR-708 | MYO1C  | 0 | 1 | 0 | 1 | 0 | 0 | 1 | 0 | 0 | 1 | 4 |
| hsa-miR-708 | MYO5A  | 1 | 1 | 0 | 1 | 0 | 0 | 1 | 0 | 0 | 1 | 5 |
| hsa-miR-708 | MYOC   | 1 | 1 | 0 | 1 | 0 | 0 | 1 | 0 | 0 | 1 | 5 |
| hsa-miR-708 | MYST3  | 1 | 0 | 0 | 1 | 0 | 0 | 1 | 0 | 0 | 1 | 4 |
| hsa-miR-708 | N4BP1  | 1 | 1 | 0 | 0 | 0 | 0 | 1 | 0 | 0 | 1 | 4 |
| hsa-miR-708 | N4BP3  | 1 | 1 | 0 | 1 | 0 | 0 | 1 | 0 | 0 | 1 | 5 |
| hsa-miR-708 | N6AMT1 | 1 | 1 | 0 | 1 | 0 | 0 | 1 | 0 | 0 | 0 | 4 |
| hsa-miR-708 | NAB2   | 1 | 1 | 0 | 1 | 0 | 0 | 1 | 0 | 0 | 0 | 4 |
| hsa-miR-708 | NAGPA  | 1 | 1 | 0 | 1 | 0 | 0 | 1 | 0 | 0 | 1 | 5 |
| hsa-miR-708 | NANOS1 | 1 | 1 | 0 | 1 | 0 | 0 | 1 | 0 | 0 | 1 | 5 |
| hsa-miR-708 | NAPA   | 1 | 1 | 0 | 1 | 0 | 0 | 1 | 0 | 0 | 0 | 4 |
| hsa-miR-708 | NAT14  | 1 | 1 | 0 | 1 | 0 | 0 | 1 | 0 | 0 | 1 | 5 |
| hsa-miR-708 | NAT9   | 1 | 1 | 0 | 1 | 0 | 0 | 1 | 0 | 0 | 1 | 5 |
| hsa-miR-708 | NAV1   | 1 | 1 | 0 | 1 | 0 | 0 | 1 | 0 | 0 | 1 | 5 |
| hsa-miR-708 | NBPF3  | 1 | 1 | 0 | 1 | 0 | 0 | 1 | 0 | 0 | 0 | 4 |
| hsa-miR-708 | NCAM1  | 1 | 1 | 0 | 1 | 0 | 0 | 1 | 0 | 0 | 1 | 5 |
| hsa-miR-708 | NCAN   | 1 | 1 | 0 | 1 | 0 | 0 | 1 | 0 | 0 | 1 | 5 |
| hsa-miR-708 | NCAPD3 | 1 | 1 | 0 | 1 | 0 | 0 | 1 | 0 | 0 | 1 | 5 |
| hsa-miR-708 | NCLN   | 1 | 1 | 0 | 1 | 0 | 0 | 1 | 0 | 0 | 0 | 4 |

|             |        |   |   |   |   |   |   |   |   |   |   |   |
|-------------|--------|---|---|---|---|---|---|---|---|---|---|---|
| hsa-miR-708 | NCOA5  | 1 | 1 | 0 | 1 | 0 | 0 | 1 | 0 | 0 | 1 | 5 |
| hsa-miR-708 | NDE1   | 1 | 1 | 0 | 1 | 0 | 0 | 1 | 0 | 0 | 0 | 4 |
| hsa-miR-708 | NDRG2  | 1 | 0 | 0 | 1 | 0 | 0 | 1 | 0 | 0 | 1 | 4 |
| hsa-miR-708 | NDRG3  | 1 | 1 | 0 | 1 | 0 | 0 | 1 | 0 | 0 | 0 | 4 |
| hsa-miR-708 | NDST1  | 1 | 1 | 0 | 1 | 0 | 0 | 1 | 0 | 0 | 1 | 5 |
| hsa-miR-708 | NECAP2 | 1 | 1 | 0 | 1 | 0 | 0 | 1 | 0 | 0 | 1 | 5 |
| hsa-miR-708 | NELL1  | 1 | 1 | 0 | 1 | 0 | 0 | 1 | 0 | 0 | 1 | 5 |
| hsa-miR-708 | NETO1  | 0 | 1 | 0 | 1 | 0 | 0 | 1 | 0 | 0 | 1 | 4 |
| hsa-miR-708 | NEU3   | 1 | 1 | 0 | 1 | 0 | 0 | 1 | 0 | 0 | 1 | 5 |
| hsa-miR-708 | NEURL  | 1 | 1 | 0 | 1 | 0 | 0 | 1 | 0 | 0 | 1 | 5 |
| hsa-miR-708 | NF2    | 1 | 1 | 0 | 1 | 0 | 0 | 1 | 0 | 0 | 0 | 4 |
| hsa-miR-708 | NFASC  | 1 | 0 | 0 | 1 | 0 | 0 | 1 | 0 | 0 | 1 | 4 |
| hsa-miR-708 | NFAT5  | 1 | 1 | 0 | 1 | 0 | 0 | 0 | 0 | 0 | 1 | 4 |
| hsa-miR-708 | NFE2L1 | 1 | 1 | 0 | 1 | 0 | 0 | 1 | 0 | 0 | 0 | 4 |
| hsa-miR-708 | NFE2L2 | 1 | 1 | 1 | 1 | 0 | 0 | 1 | 0 | 0 | 1 | 6 |
| hsa-miR-708 | NFIX   | 1 | 1 | 0 | 1 | 0 | 0 | 1 | 0 | 0 | 0 | 4 |
| hsa-miR-708 | NGB    | 1 | 1 | 0 | 1 | 0 | 0 | 1 | 0 | 0 | 1 | 5 |
| hsa-miR-708 | NGDN   | 1 | 1 | 0 | 1 | 0 | 0 | 1 | 0 | 0 | 0 | 4 |
| hsa-miR-708 | NGFR   | 1 | 1 | 0 | 1 | 0 | 0 | 1 | 0 | 0 | 1 | 5 |
| hsa-miR-708 | NHLH1  | 1 | 1 | 0 | 0 | 0 | 0 | 1 | 0 | 0 | 1 | 4 |
| hsa-miR-708 | NICN1  | 1 | 1 | 0 | 1 | 0 | 0 | 1 | 0 | 0 | 1 | 5 |
| hsa-miR-708 | NID1   | 1 | 1 | 0 | 1 | 0 | 0 | 1 | 0 | 0 | 1 | 5 |
| hsa-miR-708 | NIP30  | 1 | 1 | 0 | 1 | 0 | 0 | 1 | 0 | 0 | 1 | 5 |
| hsa-miR-708 | NKX2-3 | 0 | 1 | 0 | 1 | 0 | 0 | 1 | 0 | 0 | 1 | 4 |
| hsa-miR-708 | NLGN2  | 1 | 1 | 0 | 1 | 0 | 0 | 1 | 0 | 0 | 1 | 5 |
| hsa-miR-708 | NLRC3  | 1 | 1 | 0 | 1 | 0 | 0 | 1 | 0 | 0 | 1 | 5 |
| hsa-miR-708 | NMNAT3 | 1 | 1 | 0 | 1 | 0 | 0 | 1 | 0 | 0 | 1 | 5 |
| hsa-miR-708 | NMT1   | 1 | 1 | 0 | 1 | 0 | 0 | 1 | 0 | 0 | 1 | 5 |
| hsa-miR-708 | NMT2   | 1 | 1 | 0 | 1 | 0 | 0 | 1 | 0 | 0 | 0 | 4 |
| hsa-miR-708 | NNAT   | 1 | 1 | 0 | 1 | 0 | 0 | 1 | 0 | 0 | 1 | 5 |
| hsa-miR-708 | NOL12  | 0 | 1 | 0 | 1 | 0 | 0 | 1 | 0 | 0 | 1 | 4 |
| hsa-miR-708 | NOPE   | 1 | 1 | 0 | 1 | 0 | 0 | 1 | 0 | 0 | 1 | 5 |
| hsa-miR-708 | NOS1   | 1 | 1 | 0 | 1 | 0 | 0 | 1 | 0 | 0 | 1 | 5 |
| hsa-miR-708 | NOS1AP | 1 | 1 | 0 | 1 | 0 | 0 | 0 | 0 | 0 | 1 | 4 |
| hsa-miR-708 | NOTCH1 | 1 | 1 | 0 | 1 | 0 | 0 | 1 | 0 | 0 | 1 | 5 |
| hsa-miR-708 | N-PAC  | 1 | 1 | 0 | 1 | 0 | 0 | 1 | 0 | 0 | 1 | 5 |
| hsa-miR-708 | NPNT   | 1 | 1 | 0 | 1 | 0 | 0 | 1 | 0 | 0 | 0 | 4 |
| hsa-miR-708 | NPY2R  | 1 | 1 | 1 | 1 | 0 | 0 | 1 | 0 | 0 | 1 | 6 |
| hsa-miR-708 | NR1H4  | 1 | 1 | 0 | 1 | 0 | 0 | 1 | 0 | 0 | 1 | 5 |
| hsa-miR-708 | NR2C2  | 1 | 1 | 0 | 1 | 0 | 0 | 1 | 0 | 0 | 0 | 4 |
| hsa-miR-708 | NR3C2  | 1 | 1 | 0 | 1 | 0 | 0 | 1 | 0 | 0 | 1 | 5 |
| hsa-miR-708 | NR4A3  | 0 | 0 | 1 | 1 | 0 | 0 | 1 | 0 | 0 | 1 | 4 |
| hsa-miR-708 | NRAS   | 1 | 1 | 1 | 1 | 0 | 0 | 1 | 0 | 0 | 1 | 6 |
| hsa-miR-708 | NRBP2  | 1 | 0 | 0 | 1 | 0 | 0 | 1 | 0 | 0 | 1 | 4 |

|             |         |   |   |   |   |   |   |   |   |   |   |   |
|-------------|---------|---|---|---|---|---|---|---|---|---|---|---|
| hsa-miR-708 | NRF1    | 1 | 1 | 0 | 1 | 0 | 0 | 1 | 0 | 0 | 1 | 5 |
| hsa-miR-708 | NRIP3   | 1 | 1 | 0 | 1 | 0 | 0 | 1 | 0 | 0 | 0 | 4 |
| hsa-miR-708 | NRSN2   | 1 | 1 | 0 | 0 | 0 | 0 | 1 | 0 | 0 | 1 | 4 |
| hsa-miR-708 | NSFL1C  | 1 | 1 | 0 | 1 | 0 | 0 | 1 | 0 | 0 | 0 | 4 |
| hsa-miR-708 | NT5C3   | 0 | 0 | 1 | 1 | 0 | 0 | 1 | 0 | 0 | 1 | 4 |
| hsa-miR-708 | NT5DC3  | 1 | 1 | 0 | 1 | 0 | 0 | 0 | 0 | 0 | 1 | 4 |
| hsa-miR-708 | NT5E    | 1 | 1 | 0 | 1 | 0 | 0 | 1 | 0 | 0 | 1 | 5 |
| hsa-miR-708 | NTN1    | 0 | 1 | 0 | 1 | 0 | 0 | 1 | 0 | 0 | 1 | 4 |
| hsa-miR-708 | NTRK2   | 1 | 0 | 0 | 1 | 0 | 0 | 1 | 0 | 0 | 1 | 4 |
| hsa-miR-708 | NTRK3   | 1 | 1 | 0 | 1 | 0 | 0 | 1 | 0 | 0 | 1 | 5 |
| hsa-miR-708 | NUAK1   | 1 | 1 | 0 | 1 | 0 | 0 | 1 | 0 | 0 | 1 | 5 |
| hsa-miR-708 | NUAK2   | 1 | 1 | 0 | 1 | 0 | 0 | 1 | 0 | 0 | 1 | 5 |
| hsa-miR-708 | NUDCD3  | 1 | 1 | 0 | 1 | 0 | 0 | 1 | 0 | 0 | 1 | 5 |
| hsa-miR-708 | NUDT11  | 1 | 1 | 0 | 1 | 0 | 0 | 1 | 0 | 0 | 1 | 5 |
| hsa-miR-708 | NUFIP1  | 1 | 1 | 0 | 1 | 0 | 0 | 1 | 0 | 0 | 1 | 5 |
| hsa-miR-708 | NUP210  | 1 | 1 | 0 | 1 | 0 | 0 | 1 | 0 | 0 | 1 | 5 |
| hsa-miR-708 | NUP98   | 1 | 1 | 0 | 1 | 0 | 0 | 1 | 0 | 0 | 1 | 5 |
| hsa-miR-708 | NUPL1   | 0 | 1 | 0 | 1 | 0 | 0 | 1 | 0 | 0 | 1 | 4 |
| hsa-miR-708 | NXF1    | 0 | 1 | 0 | 1 | 0 | 0 | 1 | 0 | 0 | 1 | 4 |
| hsa-miR-708 | NXF3    | 1 | 1 | 0 | 1 | 0 | 0 | 1 | 0 | 0 | 1 | 5 |
| hsa-miR-708 | OAS1    | 1 | 1 | 0 | 1 | 0 | 0 | 1 | 0 | 0 | 0 | 4 |
| hsa-miR-708 | OAS3    | 0 | 1 | 0 | 1 | 0 | 0 | 1 | 0 | 0 | 1 | 4 |
| hsa-miR-708 | OCRL    | 1 | 1 | 0 | 0 | 0 | 0 | 1 | 0 | 0 | 1 | 4 |
| hsa-miR-708 | ODZ3    | 0 | 1 | 0 | 1 | 0 | 0 | 1 | 0 | 0 | 1 | 4 |
| hsa-miR-708 | ODZ4    | 1 | 1 | 0 | 1 | 0 | 0 | 1 | 0 | 0 | 1 | 5 |
| hsa-miR-708 | OGDH    | 1 | 1 | 0 | 0 | 0 | 0 | 1 | 0 | 0 | 1 | 4 |
| hsa-miR-708 | OGDHL   | 1 | 1 | 0 | 1 | 0 | 0 | 1 | 0 | 0 | 1 | 5 |
| hsa-miR-708 | OLA1    | 1 | 1 | 0 | 1 | 0 | 0 | 1 | 0 | 0 | 1 | 5 |
| hsa-miR-708 | OLFM1   | 1 | 1 | 0 | 0 | 0 | 0 | 1 | 0 | 0 | 1 | 4 |
| hsa-miR-708 | OLFM4   | 1 | 1 | 0 | 0 | 0 | 0 | 1 | 0 | 0 | 1 | 4 |
| hsa-miR-708 | OLFML2A | 1 | 1 | 0 | 1 | 0 | 0 | 1 | 0 | 0 | 1 | 5 |
| hsa-miR-708 | OLFML3  | 1 | 1 | 0 | 1 | 0 | 0 | 1 | 0 | 0 | 1 | 5 |
| hsa-miR-708 | OPA3    | 0 | 1 | 0 | 1 | 0 | 0 | 1 | 0 | 0 | 1 | 4 |
| hsa-miR-708 | OPN4    | 1 | 1 | 0 | 1 | 0 | 0 | 1 | 0 | 0 | 1 | 5 |
| hsa-miR-708 | OPN5    | 1 | 1 | 0 | 1 | 0 | 0 | 1 | 0 | 0 | 1 | 5 |
| hsa-miR-708 | OR11A1  | 1 | 1 | 0 | 1 | 0 | 0 | 0 | 0 | 0 | 1 | 4 |
| hsa-miR-708 | ORC6L   | 1 | 1 | 0 | 1 | 0 | 0 | 1 | 0 | 0 | 1 | 5 |
| hsa-miR-708 | OSBPL10 | 1 | 1 | 0 | 1 | 0 | 0 | 1 | 0 | 0 | 1 | 5 |
| hsa-miR-708 | OSBPL2  | 1 | 1 | 0 | 1 | 0 | 0 | 1 | 0 | 0 | 0 | 4 |
| hsa-miR-708 | OSBPL3  | 1 | 1 | 1 | 1 | 0 | 0 | 1 | 0 | 0 | 1 | 6 |
| hsa-miR-708 | OSBPL5  | 0 | 1 | 0 | 1 | 0 | 0 | 1 | 0 | 0 | 1 | 4 |
| hsa-miR-708 | OSBPL7  | 1 | 1 | 0 | 1 | 0 | 0 | 1 | 0 | 0 | 1 | 5 |
| hsa-miR-708 | OTOF    | 1 | 1 | 0 | 1 | 0 | 0 | 1 | 0 | 0 | 1 | 5 |
| hsa-miR-708 | OTP     | 1 | 1 | 0 | 0 | 0 | 0 | 1 | 0 | 0 | 1 | 4 |

|             |         |   |   |   |   |   |   |   |   |   |   |   |
|-------------|---------|---|---|---|---|---|---|---|---|---|---|---|
| hsa-miR-708 | OTUB1   | 1 | 1 | 0 | 1 | 0 | 0 | 1 | 0 | 0 | 1 | 5 |
| hsa-miR-708 | OTUD4   | 1 | 1 | 0 | 1 | 0 | 0 | 1 | 0 | 0 | 1 | 5 |
| hsa-miR-708 | OTUD7B  | 1 | 1 | 0 | 0 | 0 | 0 | 1 | 0 | 0 | 1 | 4 |
| hsa-miR-708 | OVOL1   | 1 | 1 | 0 | 1 | 0 | 0 | 1 | 0 | 0 | 1 | 5 |
| hsa-miR-708 | OXGR1   | 1 | 1 | 0 | 1 | 0 | 0 | 1 | 0 | 0 | 1 | 5 |
| hsa-miR-708 | OXNAD1  | 1 | 1 | 0 | 1 | 0 | 0 | 1 | 0 | 0 | 1 | 5 |
| hsa-miR-708 | P15RS   | 1 | 1 | 1 | 1 | 0 | 0 | 1 | 0 | 0 | 1 | 6 |
| hsa-miR-708 | P2RX1   | 1 | 1 | 1 | 1 | 0 | 0 | 1 | 0 | 0 | 1 | 6 |
| hsa-miR-708 | P2RX4   | 1 | 1 | 0 | 1 | 0 | 0 | 1 | 0 | 0 | 1 | 5 |
| hsa-miR-708 | P4HA1   | 1 | 1 | 0 | 1 | 0 | 0 | 1 | 0 | 0 | 1 | 5 |
| hsa-miR-708 | PABPC5  | 1 | 1 | 0 | 1 | 0 | 0 | 1 | 0 | 0 | 0 | 4 |
| hsa-miR-708 | PACS1   | 1 | 1 | 0 | 1 | 0 | 0 | 1 | 0 | 0 | 0 | 4 |
| hsa-miR-708 | PACS2   | 1 | 1 | 0 | 1 | 0 | 0 | 1 | 0 | 0 | 1 | 5 |
| hsa-miR-708 | PACSIN1 | 1 | 1 | 0 | 0 | 0 | 0 | 1 | 0 | 0 | 1 | 4 |
| hsa-miR-708 | PADI1   | 1 | 1 | 0 | 1 | 0 | 0 | 1 | 0 | 0 | 1 | 5 |
| hsa-miR-708 | PADI2   | 1 | 1 | 0 | 1 | 0 | 0 | 1 | 0 | 0 | 1 | 5 |
| hsa-miR-708 | PADI3   | 1 | 1 | 0 | 1 | 0 | 0 | 1 | 0 | 0 | 1 | 5 |
| hsa-miR-708 | PAFAH2  | 1 | 1 | 0 | 1 | 0 | 0 | 1 | 0 | 0 | 1 | 5 |
| hsa-miR-708 | PAG1    | 1 | 1 | 0 | 1 | 0 | 0 | 1 | 0 | 0 | 1 | 5 |
| hsa-miR-708 | PAK2    | 1 | 1 | 1 | 1 | 0 | 0 | 1 | 0 | 0 | 1 | 6 |
| hsa-miR-708 | PAN2    | 1 | 1 | 0 | 1 | 0 | 0 | 0 | 0 | 0 | 1 | 4 |
| hsa-miR-708 | PAP2D   | 1 | 1 | 0 | 1 | 0 | 0 | 1 | 0 | 0 | 1 | 5 |
| hsa-miR-708 | PAPD5   | 1 | 1 | 0 | 1 | 0 | 0 | 1 | 0 | 0 | 1 | 5 |
| hsa-miR-708 | PAPLN   | 1 | 1 | 0 | 1 | 0 | 0 | 1 | 0 | 0 | 0 | 4 |
| hsa-miR-708 | PAPOLA  | 1 | 1 | 0 | 1 | 0 | 0 | 1 | 0 | 0 | 1 | 5 |
| hsa-miR-708 | PAPPA   | 1 | 1 | 0 | 1 | 0 | 0 | 1 | 0 | 0 | 1 | 5 |
| hsa-miR-708 | PAQR4   | 1 | 1 | 1 | 1 | 0 | 0 | 1 | 0 | 0 | 1 | 6 |
| hsa-miR-708 | PAQR5   | 1 | 0 | 0 | 1 | 0 | 0 | 1 | 0 | 0 | 1 | 4 |
| hsa-miR-708 | PAQR7   | 1 | 1 | 0 | 1 | 0 | 0 | 1 | 0 | 0 | 1 | 5 |
| hsa-miR-708 | PARK2   | 1 | 1 | 0 | 1 | 0 | 0 | 1 | 0 | 0 | 1 | 5 |
| hsa-miR-708 | PARP16  | 1 | 1 | 0 | 1 | 0 | 0 | 1 | 0 | 0 | 0 | 4 |
| hsa-miR-708 | PAX3    | 1 | 1 | 0 | 1 | 0 | 0 | 1 | 0 | 0 | 0 | 4 |
| hsa-miR-708 | PAX4    | 1 | 1 | 0 | 1 | 0 | 0 | 1 | 0 | 0 | 0 | 4 |
| hsa-miR-708 | PAX8    | 1 | 1 | 0 | 1 | 0 | 0 | 1 | 0 | 0 | 1 | 5 |
| hsa-miR-708 | PBK     | 1 | 1 | 0 | 1 | 0 | 0 | 1 | 0 | 0 | 1 | 5 |
| hsa-miR-708 | PCDH1   | 1 | 1 | 0 | 1 | 0 | 0 | 1 | 0 | 0 | 0 | 4 |
| hsa-miR-708 | PCDH20  | 1 | 1 | 0 | 1 | 0 | 0 | 1 | 0 | 0 | 0 | 4 |
| hsa-miR-708 | PCDH21  | 1 | 1 | 0 | 1 | 0 | 0 | 1 | 0 | 0 | 0 | 4 |
| hsa-miR-708 | PCDHA6  | 1 | 1 | 0 | 1 | 0 | 0 | 1 | 0 | 0 | 0 | 4 |
| hsa-miR-708 | PCDHA9  | 1 | 1 | 0 | 1 | 0 | 0 | 1 | 0 | 0 | 1 | 5 |
| hsa-miR-708 | PCGF3   | 1 | 1 | 0 | 1 | 0 | 0 | 1 | 0 | 0 | 1 | 5 |
| hsa-miR-708 | PCGF5   | 1 | 1 | 0 | 1 | 0 | 0 | 1 | 0 | 0 | 1 | 5 |
| hsa-miR-708 | PCNX    | 0 | 1 | 0 | 1 | 0 | 0 | 1 | 0 | 0 | 1 | 4 |
| hsa-miR-708 | PCSK7   | 1 | 1 | 0 | 1 | 0 | 0 | 1 | 0 | 0 | 0 | 4 |

|             |          |   |   |   |   |   |   |   |   |   |   |   |
|-------------|----------|---|---|---|---|---|---|---|---|---|---|---|
| hsa-miR-708 | PCYOX1   | 1 | 1 | 0 | 1 | 0 | 0 | 1 | 0 | 0 | 1 | 5 |
| hsa-miR-708 | PCYOX1L  | 1 | 1 | 0 | 1 | 0 | 0 | 1 | 0 | 0 | 1 | 5 |
| hsa-miR-708 | PCYT1B   | 1 | 1 | 0 | 1 | 0 | 0 | 1 | 0 | 0 | 1 | 5 |
| hsa-miR-708 | PDCD1    | 1 | 1 | 0 | 1 | 0 | 0 | 1 | 0 | 0 | 1 | 5 |
| hsa-miR-708 | PDCD1LG2 | 0 | 1 | 0 | 1 | 0 | 0 | 1 | 0 | 0 | 1 | 4 |
| hsa-miR-708 | PDE1B    | 1 | 1 | 0 | 1 | 0 | 0 | 1 | 0 | 0 | 1 | 5 |
| hsa-miR-708 | PDE2A    | 1 | 1 | 0 | 1 | 0 | 0 | 1 | 0 | 0 | 0 | 4 |
| hsa-miR-708 | PDE8A    | 1 | 1 | 0 | 1 | 0 | 0 | 1 | 0 | 0 | 1 | 5 |
| hsa-miR-708 | PDGFB    | 1 | 1 | 0 | 1 | 0 | 0 | 1 | 0 | 0 | 0 | 4 |
| hsa-miR-708 | PDK4     | 1 | 1 | 1 | 0 | 0 | 0 | 1 | 0 | 0 | 1 | 5 |
| hsa-miR-708 | PDLIM4   | 1 | 1 | 0 | 1 | 0 | 0 | 1 | 0 | 0 | 1 | 5 |
| hsa-miR-708 | PDPR     | 1 | 1 | 0 | 1 | 0 | 0 | 1 | 0 | 0 | 1 | 5 |
| hsa-miR-708 | PDZD4    | 1 | 1 | 0 | 1 | 0 | 0 | 1 | 0 | 0 | 1 | 5 |
| hsa-miR-708 | PELL1    | 1 | 1 | 0 | 1 | 0 | 0 | 1 | 0 | 0 | 0 | 4 |
| hsa-miR-708 | PEX11G   | 1 | 1 | 0 | 0 | 0 | 0 | 1 | 0 | 0 | 1 | 4 |
| hsa-miR-708 | PEX12    | 1 | 1 | 0 | 1 | 0 | 0 | 1 | 0 | 0 | 1 | 5 |
| hsa-miR-708 | PFDN1    | 1 | 1 | 0 | 1 | 0 | 0 | 1 | 0 | 0 | 1 | 5 |
| hsa-miR-708 | PFKM     | 1 | 1 | 0 | 1 | 0 | 0 | 1 | 0 | 0 | 1 | 5 |
| hsa-miR-708 | PFTK1    | 1 | 1 | 0 | 0 | 0 | 0 | 1 | 0 | 0 | 1 | 4 |
| hsa-miR-708 | PGF      | 1 | 1 | 0 | 0 | 0 | 0 | 1 | 0 | 0 | 1 | 4 |
| hsa-miR-708 | PGPEP1   | 1 | 1 | 0 | 1 | 0 | 0 | 1 | 0 | 0 | 1 | 5 |
| hsa-miR-708 | PHCA     | 1 | 1 | 0 | 1 | 0 | 0 | 1 | 0 | 0 | 1 | 5 |
| hsa-miR-708 | PHF15    | 1 | 1 | 0 | 1 | 0 | 0 | 1 | 0 | 0 | 1 | 5 |
| hsa-miR-708 | PHF19    | 1 | 1 | 0 | 1 | 0 | 0 | 1 | 0 | 0 | 1 | 5 |
| hsa-miR-708 | PHF21A   | 0 | 1 | 0 | 1 | 0 | 0 | 1 | 0 | 0 | 1 | 4 |
| hsa-miR-708 | PHF6     | 1 | 1 | 0 | 1 | 0 | 0 | 1 | 0 | 0 | 1 | 5 |
| hsa-miR-708 | PHKB     | 1 | 1 | 0 | 1 | 0 | 0 | 0 | 0 | 0 | 1 | 4 |
| hsa-miR-708 | PHKG2    | 1 | 1 | 0 | 1 | 0 | 0 | 1 | 0 | 0 | 1 | 5 |
| hsa-miR-708 | PHLDA1   | 1 | 1 | 0 | 1 | 0 | 0 | 1 | 0 | 0 | 1 | 5 |
| hsa-miR-708 | PHLPP1   | 1 | 1 | 0 | 1 | 0 | 0 | 1 | 0 | 0 | 1 | 5 |
| hsa-miR-708 | PHOX2A   | 1 | 1 | 0 | 1 | 0 | 0 | 1 | 0 | 0 | 1 | 5 |
| hsa-miR-708 | PHYHIP   | 1 | 0 | 0 | 1 | 0 | 0 | 1 | 0 | 0 | 1 | 4 |
| hsa-miR-708 | PI15     | 1 | 1 | 0 | 1 | 0 | 0 | 1 | 0 | 0 | 1 | 5 |
| hsa-miR-708 | PIGR     | 1 | 1 | 0 | 1 | 0 | 0 | 1 | 0 | 0 | 1 | 5 |
| hsa-miR-708 | PIGZ     | 1 | 1 | 0 | 1 | 0 | 0 | 1 | 0 | 0 | 1 | 5 |
| hsa-miR-708 | PIK3IP1  | 1 | 1 | 0 | 1 | 0 | 0 | 1 | 0 | 0 | 1 | 5 |
| hsa-miR-708 | PIK3R3   | 1 | 1 | 0 | 1 | 0 | 0 | 1 | 0 | 0 | 1 | 5 |
| hsa-miR-708 | PIN4     | 1 | 1 | 0 | 1 | 0 | 0 | 1 | 0 | 0 | 0 | 4 |
| hsa-miR-708 | PIP4K2C  | 1 | 1 | 0 | 1 | 0 | 0 | 1 | 0 | 0 | 0 | 4 |
| hsa-miR-708 | PIP5K1A  | 1 | 0 | 0 | 1 | 0 | 0 | 1 | 0 | 0 | 1 | 4 |
| hsa-miR-708 | PITPNM2  | 1 | 1 | 0 | 1 | 0 | 0 | 1 | 0 | 0 | 0 | 4 |
| hsa-miR-708 | PITX2    | 1 | 1 | 0 | 1 | 0 | 0 | 1 | 0 | 0 | 1 | 5 |
| hsa-miR-708 | PKD1L2   | 1 | 1 | 0 | 1 | 0 | 0 | 0 | 0 | 0 | 1 | 4 |
| hsa-miR-708 | PKMYT1   | 1 | 1 | 0 | 1 | 0 | 0 | 1 | 0 | 0 | 0 | 4 |

|             |          |   |   |   |   |   |   |   |   |   |   |   |
|-------------|----------|---|---|---|---|---|---|---|---|---|---|---|
| hsa-miR-708 | PKN2     | 1 | 1 | 0 | 1 | 0 | 0 | 1 | 0 | 0 | 0 | 4 |
| hsa-miR-708 | PKNOX1   | 1 | 1 | 0 | 1 | 0 | 0 | 1 | 0 | 0 | 1 | 5 |
| hsa-miR-708 | PKNOX2   | 1 | 1 | 0 | 1 | 0 | 0 | 1 | 0 | 0 | 1 | 5 |
| hsa-miR-708 | PLA2G2F  | 1 | 1 | 0 | 1 | 0 | 0 | 1 | 0 | 0 | 1 | 5 |
| hsa-miR-708 | PLA2G4C  | 1 | 1 | 0 | 1 | 0 | 0 | 1 | 0 | 0 | 0 | 4 |
| hsa-miR-708 | PLA2G4F  | 1 | 1 | 0 | 1 | 0 | 0 | 1 | 0 | 0 | 1 | 5 |
| hsa-miR-708 | PLA2G5   | 0 | 1 | 0 | 1 | 0 | 0 | 1 | 0 | 0 | 1 | 4 |
| hsa-miR-708 | PLAG1    | 1 | 1 | 0 | 1 | 0 | 0 | 0 | 0 | 0 | 1 | 4 |
| hsa-miR-708 | PLCD3    | 1 | 1 | 0 | 1 | 0 | 0 | 1 | 0 | 0 | 1 | 5 |
| hsa-miR-708 | PLD2     | 1 | 1 | 0 | 0 | 0 | 0 | 1 | 0 | 0 | 1 | 4 |
| hsa-miR-708 | PLD5     | 1 | 1 | 0 | 1 | 0 | 0 | 1 | 0 | 0 | 0 | 4 |
| hsa-miR-708 | PLEK     | 1 | 1 | 0 | 1 | 0 | 0 | 1 | 0 | 0 | 1 | 5 |
| hsa-miR-708 | PLEKHA2  | 0 | 1 | 0 | 1 | 0 | 0 | 1 | 0 | 0 | 1 | 4 |
| hsa-miR-708 | PLEKHA6  | 1 | 1 | 0 | 1 | 0 | 0 | 1 | 0 | 0 | 1 | 5 |
| hsa-miR-708 | PLEKHA7  | 1 | 1 | 0 | 1 | 0 | 0 | 1 | 0 | 0 | 1 | 5 |
| hsa-miR-708 | PLEKHB1  | 1 | 1 | 0 | 1 | 0 | 0 | 0 | 0 | 0 | 1 | 4 |
| hsa-miR-708 | PLEKHG4B | 1 | 1 | 0 | 1 | 0 | 0 | 1 | 0 | 0 | 0 | 4 |
| hsa-miR-708 | PLEKHH1  | 1 | 1 | 0 | 0 | 0 | 0 | 1 | 0 | 0 | 1 | 4 |
| hsa-miR-708 | PLEKHN1  | 1 | 1 | 0 | 1 | 0 | 0 | 1 | 0 | 0 | 1 | 5 |
| hsa-miR-708 | PLK3     | 1 | 1 | 0 | 0 | 0 | 0 | 1 | 0 | 0 | 1 | 4 |
| hsa-miR-708 | PLVAP    | 1 | 1 | 0 | 1 | 0 | 0 | 1 | 0 | 0 | 0 | 4 |
| hsa-miR-708 | PLXDC1   | 1 | 1 | 0 | 1 | 0 | 0 | 1 | 0 | 0 | 1 | 5 |
| hsa-miR-708 | PLXNA1   | 1 | 1 | 0 | 1 | 0 | 0 | 1 | 0 | 0 | 1 | 5 |
| hsa-miR-708 | PLXNA2   | 1 | 1 | 0 | 1 | 0 | 0 | 1 | 0 | 0 | 1 | 5 |
| hsa-miR-708 | PLXNA3   | 1 | 1 | 0 | 1 | 0 | 0 | 1 | 0 | 0 | 0 | 4 |
| hsa-miR-708 | PLXNA4   | 0 | 1 | 0 | 1 | 0 | 0 | 1 | 0 | 0 | 1 | 4 |
| hsa-miR-708 | PMAIP1   | 1 | 1 | 0 | 1 | 0 | 0 | 1 | 0 | 0 | 0 | 4 |
| hsa-miR-708 | PML      | 1 | 1 | 0 | 1 | 0 | 0 | 1 | 0 | 0 | 1 | 5 |
| hsa-miR-708 | PNMA3    | 1 | 1 | 0 | 0 | 0 | 0 | 1 | 0 | 0 | 1 | 4 |
| hsa-miR-708 | PNMA6A   | 0 | 1 | 0 | 1 | 0 | 0 | 1 | 0 | 0 | 1 | 4 |
| hsa-miR-708 | PNMAL1   | 1 | 1 | 0 | 1 | 0 | 0 | 1 | 0 | 0 | 1 | 5 |
| hsa-miR-708 | PNMAL2   | 0 | 1 | 0 | 1 | 0 | 0 | 1 | 0 | 0 | 1 | 4 |
| hsa-miR-708 | PODXL2   | 1 | 1 | 0 | 1 | 0 | 0 | 1 | 0 | 0 | 0 | 4 |
| hsa-miR-708 | POFUT1   | 1 | 1 | 0 | 1 | 0 | 0 | 1 | 0 | 0 | 1 | 5 |
| hsa-miR-708 | POFUT2   | 1 | 1 | 0 | 1 | 0 | 0 | 1 | 0 | 0 | 0 | 4 |
| hsa-miR-708 | POLA1    | 1 | 1 | 0 | 1 | 0 | 0 | 1 | 0 | 0 | 1 | 5 |
| hsa-miR-708 | POLR1D   | 1 | 1 | 0 | 1 | 0 | 0 | 1 | 0 | 0 | 0 | 4 |
| hsa-miR-708 | POU2AF1  | 1 | 1 | 0 | 1 | 0 | 0 | 1 | 0 | 0 | 0 | 4 |
| hsa-miR-708 | POU6F1   | 1 | 1 | 0 | 0 | 0 | 0 | 1 | 0 | 0 | 1 | 4 |
| hsa-miR-708 | PPARA    | 1 | 1 | 0 | 1 | 0 | 0 | 0 | 0 | 0 | 1 | 4 |
| hsa-miR-708 | PPARD    | 1 | 1 | 0 | 1 | 0 | 0 | 1 | 0 | 0 | 1 | 5 |
| hsa-miR-708 | PPFIA1   | 1 | 1 | 1 | 1 | 0 | 0 | 1 | 0 | 0 | 1 | 6 |
| hsa-miR-708 | PPFIA4   | 1 | 0 | 0 | 1 | 0 | 0 | 1 | 0 | 0 | 1 | 4 |
| hsa-miR-708 | PPIE     | 1 | 1 | 0 | 0 | 0 | 0 | 1 | 0 | 0 | 1 | 4 |

|             |          |   |   |   |   |   |   |   |   |   |   |   |
|-------------|----------|---|---|---|---|---|---|---|---|---|---|---|
| hsa-miR-708 | PPIF     | 1 | 1 | 0 | 1 | 0 | 0 | 1 | 0 | 0 | 1 | 5 |
| hsa-miR-708 | PPIL2    | 1 | 1 | 0 | 1 | 0 | 0 | 1 | 0 | 0 | 1 | 5 |
| hsa-miR-708 | PPM1E    | 1 | 1 | 0 | 1 | 0 | 0 | 1 | 0 | 0 | 1 | 5 |
| hsa-miR-708 | PPM1F    | 1 | 1 | 0 | 1 | 0 | 0 | 1 | 0 | 0 | 1 | 5 |
| hsa-miR-708 | PPM1H    | 0 | 1 | 0 | 1 | 0 | 0 | 1 | 0 | 0 | 1 | 4 |
| hsa-miR-708 | PPME1    | 0 | 1 | 0 | 1 | 0 | 0 | 1 | 0 | 0 | 1 | 4 |
| hsa-miR-708 | PPP1R12B | 0 | 1 | 0 | 1 | 0 | 0 | 1 | 0 | 0 | 1 | 4 |
| hsa-miR-708 | PPP1R14D | 1 | 1 | 0 | 1 | 0 | 0 | 0 | 0 | 0 | 1 | 4 |
| hsa-miR-708 | PPP1R16B | 1 | 1 | 0 | 1 | 0 | 0 | 1 | 0 | 0 | 1 | 5 |
| hsa-miR-708 | PPP1R3A  | 1 | 1 | 0 | 1 | 0 | 0 | 1 | 0 | 0 | 0 | 4 |
| hsa-miR-708 | PPP2R2C  | 1 | 0 | 0 | 1 | 0 | 0 | 1 | 0 | 0 | 1 | 4 |
| hsa-miR-708 | PPP3R2   | 1 | 1 | 0 | 1 | 0 | 0 | 1 | 0 | 0 | 1 | 5 |
| hsa-miR-708 | PRCC     | 1 | 1 | 0 | 1 | 0 | 0 | 1 | 0 | 0 | 1 | 5 |
| hsa-miR-708 | PRDM16   | 1 | 1 | 0 | 1 | 0 | 0 | 1 | 0 | 0 | 0 | 4 |
| hsa-miR-708 | PRDM2    | 1 | 1 | 0 | 1 | 0 | 0 | 1 | 0 | 0 | 1 | 5 |
| hsa-miR-708 | PRELP    | 1 | 0 | 0 | 1 | 0 | 0 | 1 | 0 | 0 | 1 | 4 |
| hsa-miR-708 | PREPL    | 1 | 1 | 1 | 1 | 0 | 0 | 1 | 0 | 0 | 1 | 6 |
| hsa-miR-708 | PRICKLE2 | 1 | 1 | 0 | 1 | 0 | 0 | 1 | 0 | 0 | 1 | 5 |
| hsa-miR-708 | PRKAA1   | 1 | 1 | 0 | 1 | 0 | 0 | 0 | 0 | 0 | 1 | 4 |
| hsa-miR-708 | PRKAB1   | 1 | 1 | 0 | 1 | 0 | 0 | 1 | 0 | 0 | 1 | 5 |
| hsa-miR-708 | PRKAG3   | 1 | 1 | 0 | 1 | 0 | 0 | 1 | 0 | 0 | 1 | 5 |
| hsa-miR-708 | PRKAR2A  | 1 | 1 | 0 | 1 | 0 | 0 | 1 | 0 | 0 | 0 | 4 |
| hsa-miR-708 | PRKCI    | 1 | 1 | 0 | 1 | 0 | 0 | 1 | 0 | 0 | 1 | 5 |
| hsa-miR-708 | PRKDC    | 1 | 1 | 0 | 1 | 0 | 0 | 1 | 0 | 0 | 0 | 4 |
| hsa-miR-708 | PRKRIP1  | 1 | 1 | 0 | 1 | 0 | 0 | 1 | 0 | 0 | 1 | 5 |
| hsa-miR-708 | PRLR     | 1 | 1 | 0 | 0 | 0 | 0 | 1 | 0 | 0 | 1 | 4 |
| hsa-miR-708 | PRMT8    | 1 | 1 | 0 | 1 | 0 | 0 | 1 | 0 | 0 | 1 | 5 |
| hsa-miR-708 | PROCR    | 1 | 1 | 0 | 1 | 0 | 0 | 1 | 0 | 0 | 1 | 5 |
| hsa-miR-708 | PRR18    | 0 | 1 | 0 | 1 | 0 | 0 | 1 | 0 | 0 | 1 | 4 |
| hsa-miR-708 | PRRX1    | 1 | 1 | 0 | 1 | 0 | 0 | 1 | 0 | 0 | 0 | 4 |
| hsa-miR-708 | PRSS16   | 1 | 1 | 0 | 1 | 0 | 0 | 1 | 0 | 0 | 1 | 5 |
| hsa-miR-708 | PRSS23   | 1 | 1 | 0 | 1 | 0 | 0 | 1 | 0 | 0 | 0 | 4 |
| hsa-miR-708 | PRSS27   | 1 | 1 | 0 | 1 | 0 | 0 | 1 | 0 | 0 | 0 | 4 |
| hsa-miR-708 | PRSS8    | 1 | 1 | 0 | 1 | 0 | 0 | 1 | 0 | 0 | 1 | 5 |
| hsa-miR-708 | PSAP     | 1 | 0 | 0 | 1 | 0 | 0 | 1 | 0 | 0 | 1 | 4 |
| hsa-miR-708 | PSCD1    | 1 | 0 | 0 | 1 | 0 | 0 | 1 | 0 | 0 | 1 | 4 |
| hsa-miR-708 | PSCD2    | 0 | 1 | 0 | 1 | 0 | 0 | 1 | 0 | 0 | 1 | 4 |
| hsa-miR-708 | PSCDBP   | 1 | 1 | 0 | 1 | 0 | 0 | 1 | 0 | 0 | 1 | 5 |
| hsa-miR-708 | PSD2     | 1 | 1 | 0 | 1 | 0 | 0 | 1 | 0 | 0 | 1 | 5 |
| hsa-miR-708 | PSD3     | 1 | 1 | 0 | 0 | 0 | 0 | 1 | 0 | 0 | 1 | 4 |
| hsa-miR-708 | PSD4     | 1 | 1 | 0 | 1 | 0 | 0 | 1 | 0 | 0 | 0 | 4 |
| hsa-miR-708 | PSENNEN  | 1 | 1 | 0 | 1 | 0 | 0 | 1 | 0 | 0 | 0 | 4 |
| hsa-miR-708 | PSG2     | 0 | 1 | 1 | 1 | 0 | 0 | 1 | 0 | 0 | 1 | 5 |
| hsa-miR-708 | PSMA5    | 1 | 1 | 0 | 1 | 0 | 0 | 1 | 0 | 0 | 1 | 5 |



|             |           |   |   |   |   |   |   |   |   |   |   |   |
|-------------|-----------|---|---|---|---|---|---|---|---|---|---|---|
| hsa-miR-708 | PSMD9     | 1 | 1 | 0 | 1 | 0 | 0 | 1 | 0 | 0 | 1 | 5 |
| hsa-miR-708 | PSME3     | 1 | 1 | 0 | 1 | 0 | 0 | 0 | 0 | 0 | 1 | 4 |
| hsa-miR-708 | PSMF1     | 1 | 1 | 0 | 0 | 0 | 0 | 1 | 0 | 0 | 1 | 4 |
| hsa-miR-708 | PSTPIP2   | 1 | 1 | 0 | 1 | 0 | 0 | 1 | 0 | 0 | 0 | 4 |
| hsa-miR-708 | PTCH1     | 1 | 1 | 0 | 1 | 0 | 0 | 0 | 0 | 0 | 1 | 4 |
| hsa-miR-708 | PTEN      | 1 | 1 | 0 | 1 | 0 | 0 | 1 | 0 | 0 | 1 | 5 |
| hsa-miR-708 | PTGER3    | 1 | 1 | 1 | 1 | 0 | 0 | 1 | 0 | 0 | 1 | 6 |
| hsa-miR-708 | PTGFRN    | 1 | 1 | 0 | 0 | 0 | 0 | 1 | 0 | 0 | 1 | 4 |
| hsa-miR-708 | PTGS2     | 1 | 1 | 0 | 1 | 0 | 0 | 1 | 0 | 0 | 1 | 5 |
| hsa-miR-708 | PTPN21    | 0 | 1 | 1 | 1 | 0 | 0 | 1 | 0 | 0 | 1 | 5 |
| hsa-miR-708 | PTPN3     | 1 | 1 | 0 | 1 | 0 | 0 | 1 | 0 | 0 | 1 | 5 |
| hsa-miR-708 | PTPN7     | 1 | 1 | 0 | 1 | 0 | 0 | 0 | 0 | 0 | 1 | 4 |
| hsa-miR-708 | PTPRB     | 1 | 1 | 0 | 0 | 0 | 0 | 1 | 0 | 0 | 1 | 4 |
| hsa-miR-708 | PTPRF     | 1 | 1 | 0 | 1 | 0 | 0 | 1 | 0 | 0 | 1 | 5 |
| hsa-miR-708 | PTPRJ     | 0 | 1 | 0 | 1 | 0 | 0 | 1 | 0 | 0 | 1 | 4 |
| hsa-miR-708 | PTPRN2    | 1 | 1 | 0 | 1 | 0 | 0 | 1 | 0 | 0 | 1 | 5 |
| hsa-miR-708 | PTPRR     | 1 | 1 | 0 | 1 | 0 | 0 | 1 | 0 | 0 | 1 | 5 |
| hsa-miR-708 | PTPRT     | 1 | 1 | 0 | 0 | 0 | 0 | 1 | 0 | 0 | 1 | 4 |
| hsa-miR-708 | PTPRU     | 1 | 1 | 0 | 1 | 0 | 0 | 1 | 0 | 0 | 1 | 5 |
| hsa-miR-708 | PTRF      | 1 | 1 | 0 | 1 | 0 | 0 | 1 | 0 | 0 | 1 | 5 |
| hsa-miR-708 | PTTG1IP   | 1 | 1 | 0 | 1 | 0 | 0 | 1 | 0 | 0 | 0 | 4 |
| hsa-miR-708 | PVR       | 1 | 1 | 0 | 1 | 0 | 0 | 1 | 0 | 0 | 1 | 5 |
| hsa-miR-708 | PXDN      | 1 | 1 | 0 | 1 | 0 | 0 | 1 | 0 | 0 | 1 | 5 |
| hsa-miR-708 | PXMP3     | 1 | 1 | 0 | 1 | 0 | 0 | 0 | 0 | 0 | 1 | 4 |
| hsa-miR-708 | PXMP4     | 1 | 1 | 0 | 1 | 0 | 0 | 1 | 0 | 0 | 1 | 5 |
| hsa-miR-708 | PYCRL     | 1 | 1 | 0 | 1 | 0 | 0 | 1 | 0 | 0 | 1 | 5 |
| hsa-miR-708 | QKI       | 1 | 1 | 0 | 1 | 0 | 0 | 1 | 0 | 0 | 1 | 5 |
| hsa-miR-708 | QSOX1     | 1 | 1 | 0 | 1 | 0 | 0 | 1 | 0 | 0 | 1 | 5 |
| hsa-miR-708 | QSOX2     | 1 | 1 | 0 | 1 | 0 | 0 | 1 | 0 | 0 | 0 | 4 |
| hsa-miR-708 | R3HDM2    | 1 | 1 | 0 | 1 | 0 | 0 | 1 | 0 | 0 | 1 | 5 |
| hsa-miR-708 | RAB11FIP4 | 1 | 1 | 0 | 0 | 0 | 0 | 1 | 0 | 0 | 1 | 4 |
| hsa-miR-708 | RAB11FIP5 | 1 | 1 | 0 | 1 | 0 | 0 | 1 | 0 | 0 | 1 | 5 |
| hsa-miR-708 | RAB14     | 1 | 1 | 0 | 1 | 0 | 0 | 1 | 0 | 0 | 1 | 5 |
| hsa-miR-708 | RAB15     | 1 | 1 | 0 | 1 | 0 | 0 | 1 | 0 | 0 | 1 | 5 |
| hsa-miR-708 | RAB18     | 1 | 1 | 0 | 1 | 0 | 0 | 1 | 0 | 0 | 1 | 5 |
| hsa-miR-708 | RAB1A     | 1 | 1 | 0 | 1 | 0 | 0 | 1 | 0 | 0 | 0 | 4 |
| hsa-miR-708 | RAB22A    | 1 | 1 | 0 | 1 | 0 | 0 | 1 | 0 | 0 | 1 | 5 |
| hsa-miR-708 | RAB23     | 1 | 1 | 0 | 1 | 0 | 0 | 1 | 0 | 0 | 1 | 5 |
| hsa-miR-708 | RAB24     | 1 | 1 | 0 | 1 | 0 | 0 | 1 | 0 | 0 | 1 | 5 |
| hsa-miR-708 | RAB28     | 1 | 1 | 0 | 1 | 0 | 0 | 1 | 0 | 0 | 1 | 5 |
| hsa-miR-708 | RAB2B     | 1 | 1 | 0 | 1 | 0 | 0 | 1 | 0 | 0 | 1 | 5 |
| hsa-miR-708 | RAB31     | 1 | 1 | 0 | 1 | 0 | 0 | 1 | 0 | 0 | 0 | 4 |
| hsa-miR-708 | RAB33B    | 1 | 1 | 0 | 1 | 0 | 0 | 1 | 0 | 0 | 1 | 5 |
| hsa-miR-708 | RAB36     | 1 | 1 | 0 | 1 | 0 | 0 | 1 | 0 | 0 | 1 | 5 |

|             |          |   |   |   |   |   |   |   |   |   |   |   |
|-------------|----------|---|---|---|---|---|---|---|---|---|---|---|
| hsa-miR-708 | RAB6B    | 1 | 1 | 0 | 1 | 0 | 0 | 1 | 0 | 0 | 1 | 5 |
| hsa-miR-708 | RAB7A    | 1 | 1 | 0 | 1 | 0 | 0 | 1 | 0 | 0 | 0 | 4 |
| hsa-miR-708 | RAB8B    | 1 | 1 | 0 | 1 | 0 | 0 | 1 | 0 | 0 | 1 | 5 |
| hsa-miR-708 | RABIF    | 1 | 1 | 0 | 1 | 0 | 0 | 1 | 0 | 0 | 1 | 5 |
| hsa-miR-708 | RABL5    | 1 | 1 | 0 | 1 | 0 | 0 | 0 | 0 | 0 | 1 | 4 |
| hsa-miR-708 | RAD52    | 1 | 1 | 0 | 1 | 0 | 0 | 1 | 0 | 0 | 0 | 4 |
| hsa-miR-708 | RALBP1   | 1 | 1 | 0 | 1 | 0 | 0 | 1 | 0 | 0 | 1 | 5 |
| hsa-miR-708 | RALGPS1  | 1 | 1 | 0 | 1 | 0 | 0 | 1 | 0 | 0 | 0 | 4 |
| hsa-miR-708 | RAMP3    | 1 | 1 | 0 | 1 | 0 | 0 | 1 | 0 | 0 | 1 | 5 |
| hsa-miR-708 | RANBP10  | 1 | 1 | 0 | 1 | 0 | 0 | 1 | 0 | 0 | 1 | 5 |
| hsa-miR-708 | RAP1A    | 1 | 0 | 0 | 1 | 0 | 0 | 1 | 0 | 0 | 1 | 4 |
| hsa-miR-708 | RAP1GDS1 | 0 | 1 | 0 | 1 | 0 | 0 | 1 | 0 | 0 | 1 | 4 |
| hsa-miR-708 | RAPGEF1  | 1 | 1 | 0 | 0 | 0 | 0 | 1 | 0 | 0 | 1 | 4 |
| hsa-miR-708 | RAPGEF5  | 1 | 1 | 0 | 1 | 0 | 0 | 1 | 0 | 0 | 1 | 5 |
| hsa-miR-708 | RAPGEFL1 | 1 | 1 | 0 | 1 | 0 | 0 | 1 | 0 | 0 | 1 | 5 |
| hsa-miR-708 | RAPH1    | 1 | 1 | 0 | 0 | 0 | 0 | 1 | 0 | 0 | 1 | 4 |
| hsa-miR-708 | RARG     | 1 | 1 | 0 | 0 | 0 | 0 | 1 | 0 | 0 | 1 | 4 |
| hsa-miR-708 | RASA3    | 1 | 1 | 0 | 1 | 0 | 0 | 1 | 0 | 0 | 0 | 4 |
| hsa-miR-708 | RASD2    | 1 | 1 | 0 | 1 | 0 | 0 | 1 | 0 | 0 | 1 | 5 |
| hsa-miR-708 | RASGEF1A | 1 | 1 | 0 | 1 | 0 | 0 | 1 | 0 | 0 | 1 | 5 |
| hsa-miR-708 | RASGRP1  | 1 | 1 | 0 | 1 | 0 | 0 | 1 | 0 | 0 | 0 | 4 |
| hsa-miR-708 | RASGRP4  | 0 | 1 | 0 | 1 | 0 | 0 | 1 | 0 | 0 | 1 | 4 |
| hsa-miR-708 | RASL12   | 1 | 1 | 0 | 1 | 0 | 0 | 1 | 0 | 0 | 0 | 4 |
| hsa-miR-708 | RASSF2   | 1 | 0 | 0 | 1 | 0 | 0 | 1 | 0 | 0 | 1 | 4 |
| hsa-miR-708 | RASSF4   | 1 | 1 | 0 | 1 | 0 | 0 | 1 | 0 | 0 | 1 | 5 |
| hsa-miR-708 | RAX      | 1 | 1 | 0 | 1 | 0 | 0 | 1 | 0 | 0 | 1 | 5 |
| hsa-miR-708 | RBBP5    | 1 | 1 | 0 | 1 | 0 | 0 | 1 | 0 | 0 | 1 | 5 |
| hsa-miR-708 | RBED1    | 1 | 1 | 0 | 1 | 0 | 0 | 1 | 0 | 0 | 1 | 5 |
| hsa-miR-708 | RBL1     | 1 | 1 | 0 | 0 | 0 | 0 | 1 | 0 | 0 | 1 | 4 |
| hsa-miR-708 | RBM13    | 1 | 1 | 0 | 1 | 0 | 0 | 1 | 0 | 0 | 0 | 4 |
| hsa-miR-708 | RBM23    | 1 | 1 | 0 | 1 | 0 | 0 | 1 | 0 | 0 | 1 | 5 |
| hsa-miR-708 | RBM33    | 1 | 1 | 0 | 1 | 0 | 0 | 0 | 0 | 0 | 1 | 4 |
| hsa-miR-708 | RBM35B   | 1 | 1 | 0 | 1 | 0 | 0 | 1 | 0 | 0 | 1 | 5 |
| hsa-miR-708 | RBM5     | 1 | 1 | 0 | 1 | 0 | 0 | 1 | 0 | 0 | 0 | 4 |
| hsa-miR-708 | RBMXL2   | 1 | 1 | 1 | 1 | 0 | 0 | 1 | 0 | 0 | 1 | 6 |
| hsa-miR-708 | RCAN1    | 1 | 1 | 0 | 1 | 0 | 0 | 1 | 0 | 0 | 1 | 5 |
| hsa-miR-708 | RCC2     | 1 | 0 | 0 | 1 | 0 | 0 | 1 | 0 | 0 | 1 | 4 |
| hsa-miR-708 | RCE1     | 1 | 1 | 0 | 1 | 0 | 0 | 1 | 0 | 0 | 1 | 5 |
| hsa-miR-708 | RCVRN    | 1 | 1 | 0 | 1 | 0 | 0 | 1 | 0 | 0 | 1 | 5 |
| hsa-miR-708 | RDX      | 1 | 1 | 0 | 0 | 0 | 0 | 1 | 0 | 0 | 1 | 4 |
| hsa-miR-708 | RELT     | 1 | 0 | 0 | 1 | 0 | 0 | 1 | 0 | 0 | 1 | 4 |
| hsa-miR-708 | REN      | 1 | 1 | 0 | 0 | 0 | 0 | 1 | 0 | 0 | 1 | 4 |
| hsa-miR-708 | REPS2    | 1 | 1 | 0 | 0 | 0 | 0 | 1 | 0 | 0 | 1 | 4 |
| hsa-miR-708 | RER1     | 1 | 1 | 0 | 1 | 0 | 0 | 1 | 0 | 0 | 1 | 5 |

|                         |         |   |   |   |   |   |   |   |   |   |   |   |
|-------------------------|---------|---|---|---|---|---|---|---|---|---|---|---|
| hsa-miR-708             | REVI    | 1 | 1 | 0 | 1 | 0 | 0 | 1 | 0 | 0 | 0 | 4 |
| hsa-miR-708             | REXO2   | 1 | 1 | 0 | 1 | 0 | 0 | 1 | 0 | 0 | 1 | 5 |
| hsa-miR-708             | REXO4   | 1 | 1 | 0 | 1 | 0 | 0 | 1 | 0 | 0 | 1 | 5 |
| hsa-miR-708             | RFX5    | 1 | 1 | 0 | 1 | 0 | 0 | 1 | 0 | 0 | 1 | 5 |
| hsa-miR-708             | RGL1    | 1 | 1 | 0 | 1 | 0 | 0 | 1 | 0 | 0 | 1 | 5 |
| hsa-miR-708             | RGMA    | 1 | 1 | 0 | 1 | 0 | 0 | 1 | 0 | 0 | 1 | 5 |
| hsa-miR-708             | RGS16   | 1 | 1 | 0 | 1 | 0 | 0 | 1 | 0 | 0 | 1 | 5 |
| hsa-miR-708             | RGS4    | 1 | 1 | 0 | 1 | 0 | 0 | 1 | 0 | 0 | 1 | 5 |
| hsa-miR-708             | RGS6    | 1 | 1 | 0 | 1 | 0 | 0 | 1 | 0 | 0 | 0 | 4 |
| hsa-miR-708             | RHBDD1  | 1 | 1 | 0 | 1 | 0 | 0 | 1 | 0 | 0 | 1 | 5 |
| hsa-miR-708             | RHBDD3  | 1 | 1 | 0 | 1 | 0 | 0 | 1 | 0 | 0 | 1 | 5 |
| hsa-miR-708             | RHBG    | 1 | 1 | 0 | 1 | 0 | 0 | 1 | 0 | 0 | 0 | 4 |
| hsa-miR-708             | RHO     | 1 | 1 | 1 | 1 | 0 | 0 | 1 | 0 | 0 | 1 | 6 |
| hsa-miR-708             | RHOF    | 1 | 1 | 0 | 1 | 0 | 0 | 1 | 0 | 0 | 1 | 5 |
| hsa-miR-708             | RHPN1   | 1 | 1 | 0 | 1 | 0 | 0 | 1 | 0 | 0 | 1 | 5 |
| hsa-miR-708             | RICH2   | 1 | 1 | 1 | 1 | 0 | 0 | 1 | 0 | 0 | 1 | 6 |
| hsa-miR-708             | RIMS3   | 1 | 1 | 0 | 1 | 0 | 0 | 1 | 0 | 0 | 1 | 5 |
| hsa-miR-708             | RIMS4   | 1 | 1 | 0 | 1 | 0 | 0 | 1 | 0 | 0 | 1 | 5 |
| hsa-miR-708             | RIN3    | 1 | 1 | 0 | 1 | 0 | 0 | 1 | 0 | 0 | 1 | 5 |
| hsa-miR-708             | RIPK1   | 1 | 1 | 0 | 0 | 0 | 0 | 1 | 0 | 0 | 1 | 4 |
| hsa-miR-708             | RNASE2  | 1 | 1 | 0 | 1 | 0 | 0 | 1 | 0 | 0 | 1 | 5 |
| hsa-miR-708             | RNASE3  | 1 | 1 | 0 | 1 | 0 | 0 | 1 | 0 | 0 | 1 | 5 |
| hsa-miR-708             | RNASEL  | 1 | 1 | 0 | 1 | 0 | 0 | 1 | 0 | 0 | 1 | 5 |
| hsa-miR-708             | RND2    | 1 | 1 | 0 | 1 | 0 | 0 | 1 | 0 | 0 | 1 | 5 |
| hsa-miR-708             | RNF138  | 1 | 1 | 0 | 1 | 0 | 0 | 1 | 0 | 0 | 1 | 5 |
| hsa-miR-708             | RNF141  | 1 | 1 | 0 | 1 | 0 | 0 | 1 | 0 | 0 | 1 | 5 |
| hsa-miR-708             | RNF144A | 1 | 1 | 0 | 0 | 0 | 0 | 1 | 0 | 0 | 1 | 4 |
| hsa-miR-708             | RNF150  | 1 | 1 | 0 | 1 | 0 | 0 | 1 | 0 | 0 | 1 | 5 |
| hsa-miR-708             | RNF165  | 1 | 1 | 0 | 1 | 0 | 0 | 1 | 0 | 0 | 1 | 5 |
| hsa-miR-708             | RNF186  | 1 | 1 | 0 | 0 | 0 | 0 | 1 | 0 | 0 | 1 | 4 |
| hsa-miR-708             | RNF207  | 1 | 1 | 0 | 1 | 0 | 0 | 1 | 0 | 0 | 1 | 5 |
| hsa-miR-708             | RNF213  | 1 | 1 | 0 | 1 | 0 | 0 | 1 | 0 | 0 | 1 | 5 |
| hsa-miR-708             | RNF38   | 1 | 1 | 0 | 1 | 0 | 0 | 0 | 0 | 0 | 1 | 4 |
| hsa-miR-708             | RNF43   | 1 | 1 | 0 | 1 | 0 | 0 | 1 | 0 | 0 | 0 | 4 |
| hsa-miR-708             | RNGTT   | 1 | 1 | 0 | 1 | 0 | 0 | 1 | 0 | 0 | 0 | 4 |
| hsa-miR-708             | RNMTL1  | 1 | 1 | 0 | 1 | 0 | 0 | 1 | 0 | 0 | 1 | 5 |
| hsa-miR-708             | ROBO3   | 1 | 1 | 0 | 1 | 0 | 0 | 1 | 0 | 0 | 1 | 5 |
| hsa-miR-708             | ROD1    | 1 | 0 | 0 | 1 | 0 | 0 | 1 | 0 | 0 | 1 | 4 |
| hsa-miR-708RP13-347D8.3 |         | 0 | 1 | 0 | 1 | 0 | 0 | 1 | 0 | 0 | 1 | 4 |
| hsa-miR-708             | RP1L1   | 1 | 1 | 0 | 0 | 0 | 0 | 1 | 0 | 0 | 1 | 4 |
| hsa-miR-708RP3-402G11.5 |         | 1 | 1 | 0 | 0 | 0 | 0 | 1 | 0 | 0 | 1 | 4 |
| hsa-miR-708RP5-1022P6.2 |         | 1 | 1 | 0 | 1 | 0 | 0 | 1 | 0 | 0 | 0 | 4 |
| hsa-miR-708             | RPH3AL  | 1 | 1 | 0 | 1 | 0 | 0 | 1 | 0 | 0 | 1 | 5 |
| hsa-miR-708             | RPL15   | 1 | 1 | 0 | 1 | 0 | 0 | 1 | 0 | 0 | 1 | 5 |

|             |          |   |   |   |   |   |   |   |   |   |   |   |
|-------------|----------|---|---|---|---|---|---|---|---|---|---|---|
| hsa-miR-708 | RPL22    | 1 | 1 | 0 | 1 | 0 | 0 | 1 | 0 | 0 | 0 | 4 |
| hsa-miR-708 | RPL28    | 1 | 1 | 0 | 1 | 0 | 0 | 1 | 0 | 0 | 1 | 5 |
| hsa-miR-708 | RPP25    | 1 | 1 | 0 | 1 | 0 | 0 | 1 | 0 | 0 | 1 | 5 |
| hsa-miR-708 | RPS6KA1  | 1 | 0 | 0 | 1 | 0 | 0 | 1 | 0 | 0 | 1 | 4 |
| hsa-miR-708 | RPS6KL1  | 1 | 1 | 0 | 1 | 0 | 0 | 1 | 0 | 0 | 1 | 5 |
| hsa-miR-708 | RPTN     | 1 | 1 | 1 | 1 | 0 | 0 | 0 | 0 | 0 | 0 | 4 |
| hsa-miR-708 | RREB1    | 1 | 1 | 0 | 0 | 0 | 0 | 1 | 0 | 0 | 1 | 4 |
| hsa-miR-708 | RRH      | 1 | 1 | 0 | 1 | 0 | 0 | 1 | 0 | 0 | 1 | 5 |
| hsa-miR-708 | RRM2B    | 1 | 1 | 0 | 1 | 0 | 0 | 1 | 0 | 0 | 1 | 5 |
| hsa-miR-708 | RS1      | 1 | 1 | 0 | 1 | 0 | 0 | 1 | 0 | 0 | 1 | 5 |
| hsa-miR-708 | RSAD1    | 1 | 1 | 0 | 1 | 0 | 0 | 1 | 0 | 0 | 0 | 4 |
| hsa-miR-708 | RSL1D1   | 1 | 1 | 0 | 1 | 0 | 0 | 1 | 0 | 0 | 1 | 5 |
| hsa-miR-708 | RSPO4    | 1 | 1 | 0 | 1 | 0 | 0 | 1 | 0 | 0 | 0 | 4 |
| hsa-miR-708 | RTKN2    | 1 | 1 | 0 | 1 | 0 | 0 | 1 | 0 | 0 | 1 | 5 |
| hsa-miR-708 | RTN4RL1  | 0 | 1 | 0 | 1 | 0 | 0 | 1 | 0 | 0 | 1 | 4 |
| hsa-miR-708 | RUFY2    | 1 | 1 | 0 | 1 | 0 | 0 | 1 | 0 | 0 | 0 | 4 |
| hsa-miR-708 | RUFY3    | 1 | 1 | 0 | 0 | 0 | 0 | 1 | 0 | 0 | 1 | 4 |
| hsa-miR-708 | RUNDC1   | 1 | 1 | 0 | 1 | 0 | 0 | 1 | 0 | 0 | 1 | 5 |
| hsa-miR-708 | S100A16  | 1 | 1 | 0 | 1 | 0 | 0 | 1 | 0 | 0 | 1 | 5 |
| hsa-miR-708 | S100A3   | 1 | 1 | 0 | 1 | 0 | 0 | 1 | 0 | 0 | 0 | 4 |
| hsa-miR-708 | SACM1L   | 1 | 1 | 1 | 1 | 0 | 0 | 1 | 0 | 0 | 1 | 6 |
| hsa-miR-708 | SAMD12   | 0 | 1 | 0 | 1 | 0 | 0 | 1 | 0 | 0 | 1 | 4 |
| hsa-miR-708 | SARM1    | 1 | 1 | 1 | 0 | 0 | 0 | 1 | 0 | 0 | 1 | 5 |
| hsa-miR-708 | SART1    | 1 | 1 | 0 | 1 | 0 | 0 | 1 | 0 | 0 | 0 | 4 |
| hsa-miR-708 | SC65     | 1 | 1 | 0 | 0 | 0 | 0 | 1 | 0 | 0 | 1 | 4 |
| hsa-miR-708 | SCARB2   | 1 | 1 | 1 | 1 | 0 | 0 | 1 | 0 | 0 | 1 | 6 |
| hsa-miR-708 | SCMH1    | 1 | 1 | 0 | 1 | 0 | 0 | 1 | 0 | 0 | 1 | 5 |
| hsa-miR-708 | SCML4    | 1 | 1 | 0 | 1 | 0 | 0 | 1 | 0 | 0 | 0 | 4 |
| hsa-miR-708 | SCN1B    | 1 | 0 | 0 | 1 | 0 | 0 | 1 | 0 | 0 | 1 | 4 |
| hsa-miR-708 | SCN4A    | 1 | 1 | 1 | 1 | 0 | 0 | 1 | 0 | 0 | 1 | 6 |
| hsa-miR-708 | SCN4B    | 1 | 1 | 0 | 1 | 0 | 0 | 1 | 0 | 0 | 1 | 5 |
| hsa-miR-708 | SCN5A    | 1 | 0 | 0 | 1 | 0 | 0 | 1 | 0 | 0 | 1 | 4 |
| hsa-miR-708 | SCRN2    | 1 | 1 | 0 | 1 | 0 | 0 | 1 | 0 | 0 | 0 | 4 |
| hsa-miR-708 | SCUBE1   | 1 | 1 | 0 | 1 | 0 | 0 | 1 | 0 | 0 | 1 | 5 |
| hsa-miR-708 | SDC1     | 1 | 0 | 0 | 1 | 0 | 0 | 1 | 0 | 0 | 1 | 4 |
| hsa-miR-708 | SDC3     | 1 | 1 | 1 | 1 | 0 | 0 | 0 | 0 | 0 | 0 | 4 |
| hsa-miR-708 | SDC4     | 1 | 1 | 0 | 0 | 0 | 0 | 1 | 0 | 0 | 1 | 4 |
| hsa-miR-708 | SDCCAG8  | 1 | 1 | 0 | 1 | 0 | 0 | 1 | 0 | 0 | 1 | 5 |
| hsa-miR-708 | SDF4     | 1 | 1 | 0 | 1 | 0 | 0 | 1 | 0 | 0 | 1 | 5 |
| hsa-miR-708 | SDHC     | 1 | 1 | 0 | 1 | 0 | 0 | 1 | 0 | 0 | 0 | 4 |
| hsa-miR-708 | SEC16A   | 0 | 1 | 0 | 1 | 0 | 0 | 1 | 0 | 0 | 1 | 4 |
| hsa-miR-708 | SECISBP2 | 1 | 1 | 0 | 1 | 0 | 0 | 1 | 0 | 0 | 1 | 5 |
| hsa-miR-708 | SELL     | 1 | 1 | 0 | 0 | 0 | 0 | 1 | 0 | 0 | 1 | 4 |
| hsa-miR-708 | SEMA4C   | 1 | 1 | 0 | 1 | 0 | 0 | 1 | 0 | 0 | 1 | 5 |

|             |          |   |   |   |   |   |   |   |   |   |   |   |
|-------------|----------|---|---|---|---|---|---|---|---|---|---|---|
| hsa-miR-708 | SEMA4F   | 1 | 1 | 1 | 1 | 0 | 0 | 1 | 0 | 0 | 1 | 6 |
| hsa-miR-708 | SEMA4G   | 1 | 1 | 0 | 1 | 0 | 0 | 1 | 0 | 0 | 1 | 5 |
| hsa-miR-708 | SEMA5A   | 1 | 1 | 0 | 1 | 0 | 0 | 1 | 0 | 0 | 1 | 5 |
| hsa-miR-708 | SEMA6D   | 1 | 1 | 0 | 1 | 0 | 0 | 1 | 0 | 0 | 0 | 4 |
| hsa-miR-708 | SEMA7A   | 1 | 1 | 0 | 1 | 0 | 0 | 1 | 0 | 0 | 1 | 5 |
| hsa-miR-708 | SENP1    | 1 | 1 | 0 | 1 | 0 | 0 | 1 | 0 | 0 | 1 | 5 |
| hsa-miR-708 | SERBP1   | 1 | 1 | 0 | 1 | 0 | 0 | 1 | 0 | 0 | 0 | 4 |
| hsa-miR-708 | SERF2    | 1 | 1 | 0 | 1 | 0 | 0 | 1 | 0 | 0 | 0 | 4 |
| hsa-miR-708 | SERPINB8 | 1 | 1 | 0 | 1 | 0 | 0 | 0 | 0 | 0 | 1 | 4 |
| hsa-miR-708 | SERPINF2 | 1 | 1 | 0 | 1 | 0 | 0 | 1 | 0 | 0 | 1 | 5 |
| hsa-miR-708 | SESN1    | 1 | 1 | 1 | 1 | 0 | 0 | 1 | 0 | 0 | 1 | 6 |
| hsa-miR-708 | SETD3    | 0 | 1 | 0 | 1 | 0 | 0 | 1 | 0 | 0 | 1 | 4 |
| hsa-miR-708 | SETDB1   | 1 | 0 | 0 | 1 | 0 | 0 | 1 | 0 | 0 | 1 | 4 |
| hsa-miR-708 | SEZ6     | 1 | 1 | 0 | 1 | 0 | 0 | 1 | 0 | 0 | 0 | 4 |
| hsa-miR-708 | SF1      | 1 | 1 | 0 | 1 | 0 | 0 | 1 | 0 | 0 | 0 | 4 |
| hsa-miR-708 | SF3A1    | 1 | 1 | 0 | 0 | 0 | 0 | 1 | 0 | 0 | 1 | 4 |
| hsa-miR-708 | SF3B4    | 1 | 1 | 0 | 1 | 0 | 0 | 1 | 0 | 0 | 1 | 5 |
| hsa-miR-708 | SFRS11   | 1 | 1 | 1 | 1 | 0 | 0 | 1 | 0 | 0 | 1 | 6 |
| hsa-miR-708 | SFRS14   | 1 | 1 | 0 | 0 | 0 | 0 | 1 | 0 | 0 | 1 | 4 |
| hsa-miR-708 | SFRS6    | 1 | 1 | 1 | 1 | 0 | 0 | 1 | 0 | 0 | 1 | 6 |
| hsa-miR-708 | SFT2D3   | 1 | 1 | 0 | 0 | 0 | 0 | 1 | 0 | 0 | 1 | 4 |
| hsa-miR-708 | SFTPB    | 1 | 1 | 0 | 1 | 0 | 0 | 1 | 0 | 0 | 1 | 5 |
| hsa-miR-708 | SFXN1    | 1 | 1 | 0 | 0 | 0 | 0 | 1 | 0 | 0 | 1 | 4 |
| hsa-miR-708 | SFXN2    | 1 | 1 | 0 | 1 | 0 | 0 | 1 | 0 | 0 | 1 | 5 |
| hsa-miR-708 | SFXN5    | 1 | 1 | 0 | 1 | 0 | 0 | 1 | 0 | 0 | 1 | 5 |
| hsa-miR-708 | SGCA     | 1 | 1 | 0 | 1 | 0 | 0 | 1 | 0 | 0 | 1 | 5 |
| hsa-miR-708 | SGCD     | 1 | 0 | 0 | 1 | 0 | 0 | 1 | 0 | 0 | 1 | 4 |
| hsa-miR-708 | SGK269   | 1 | 1 | 1 | 1 | 0 | 0 | 1 | 0 | 0 | 1 | 6 |
| hsa-miR-708 | SGPL1    | 1 | 1 | 0 | 1 | 0 | 0 | 1 | 0 | 0 | 0 | 4 |
| hsa-miR-708 | SGSM1    | 1 | 1 | 0 | 1 | 0 | 0 | 1 | 0 | 0 | 1 | 5 |
| hsa-miR-708 | SGSM2    | 1 | 1 | 0 | 1 | 0 | 0 | 1 | 0 | 0 | 1 | 5 |
| hsa-miR-708 | SH2B1    | 1 | 1 | 0 | 1 | 0 | 0 | 1 | 0 | 0 | 1 | 5 |
| hsa-miR-708 | SH2B3    | 1 | 1 | 0 | 1 | 0 | 0 | 1 | 0 | 0 | 1 | 5 |
| hsa-miR-708 | SH3BP1   | 1 | 1 | 0 | 0 | 0 | 0 | 1 | 0 | 0 | 1 | 4 |
| hsa-miR-708 | SH3GL2   | 1 | 1 | 0 | 1 | 0 | 0 | 1 | 0 | 0 | 1 | 5 |
| hsa-miR-708 | SH3GLB1  | 1 | 1 | 0 | 1 | 0 | 0 | 1 | 0 | 0 | 1 | 5 |
| hsa-miR-708 | SH3PXD2B | 1 | 1 | 0 | 1 | 0 | 0 | 1 | 0 | 0 | 1 | 5 |
| hsa-miR-708 | SH3TC2   | 1 | 1 | 1 | 0 | 0 | 0 | 1 | 0 | 0 | 1 | 5 |
| hsa-miR-708 | SHANK2   | 1 | 1 | 1 | 1 | 0 | 0 | 1 | 0 | 0 | 1 | 6 |
| hsa-miR-708 | SHANK3   | 0 | 1 | 0 | 1 | 0 | 0 | 1 | 0 | 0 | 1 | 4 |
| hsa-miR-708 | SHB      | 1 | 1 | 0 | 1 | 0 | 0 | 1 | 0 | 0 | 1 | 5 |
| hsa-miR-708 | SHF      | 1 | 1 | 0 | 1 | 0 | 0 | 1 | 0 | 0 | 0 | 4 |
| hsa-miR-708 | SHROOM2  | 1 | 1 | 0 | 1 | 0 | 0 | 1 | 0 | 0 | 1 | 5 |
| hsa-miR-708 | SIDT1    | 1 | 1 | 0 | 1 | 0 | 0 | 1 | 0 | 0 | 1 | 5 |

|             |          |   |   |   |   |   |   |   |   |   |   |   |
|-------------|----------|---|---|---|---|---|---|---|---|---|---|---|
| hsa-miR-708 | SIDT2    | 1 | 1 | 0 | 1 | 0 | 0 | 1 | 0 | 0 | 1 | 5 |
| hsa-miR-708 | SIGLEC1  | 1 | 1 | 0 | 1 | 0 | 0 | 1 | 0 | 0 | 1 | 5 |
| hsa-miR-708 | SIGLEC11 | 1 | 1 | 0 | 1 | 0 | 0 | 1 | 0 | 0 | 1 | 5 |
| hsa-miR-708 | SIM1     | 1 | 1 | 0 | 1 | 0 | 0 | 1 | 0 | 0 | 0 | 4 |
| hsa-miR-708 | SIM2     | 1 | 1 | 0 | 1 | 0 | 0 | 1 | 0 | 0 | 1 | 5 |
| hsa-miR-708 | SIPA1L3  | 1 | 1 | 0 | 1 | 0 | 0 | 1 | 0 | 0 | 1 | 5 |
| hsa-miR-708 | SIRPG    | 1 | 1 | 0 | 1 | 0 | 0 | 1 | 0 | 0 | 0 | 4 |
| hsa-miR-708 | SIRT2    | 1 | 1 | 0 | 1 | 0 | 0 | 1 | 0 | 0 | 1 | 5 |
| hsa-miR-708 | SIRT3    | 1 | 1 | 1 | 1 | 0 | 0 | 1 | 0 | 0 | 1 | 6 |
| hsa-miR-708 | SKAP2    | 1 | 1 | 0 | 1 | 0 | 0 | 1 | 0 | 0 | 1 | 5 |
| hsa-miR-708 | SLAMF6   | 1 | 1 | 0 | 1 | 0 | 0 | 1 | 0 | 0 | 1 | 5 |
| hsa-miR-708 | SLBP     | 1 | 1 | 0 | 1 | 0 | 0 | 1 | 0 | 0 | 1 | 5 |
| hsa-miR-708 | SLC12A5  | 1 | 0 | 0 | 1 | 0 | 0 | 1 | 0 | 0 | 1 | 4 |
| hsa-miR-708 | SLC13A3  | 1 | 0 | 1 | 1 | 0 | 0 | 1 | 0 | 0 | 1 | 5 |
| hsa-miR-708 | SLC13A5  | 1 | 1 | 1 | 1 | 0 | 0 | 1 | 0 | 0 | 1 | 6 |
| hsa-miR-708 | SLC1A2   | 1 | 1 | 0 | 1 | 0 | 0 | 1 | 0 | 0 | 1 | 5 |
| hsa-miR-708 | SLC1A7   | 1 | 1 | 0 | 0 | 0 | 0 | 1 | 0 | 0 | 1 | 4 |
| hsa-miR-708 | SLC22A3  | 1 | 1 | 0 | 1 | 0 | 0 | 1 | 0 | 0 | 1 | 5 |
| hsa-miR-708 | SLC24A1  | 1 | 1 | 0 | 0 | 0 | 0 | 1 | 0 | 0 | 1 | 4 |
| hsa-miR-708 | SLC24A2  | 1 | 1 | 0 | 1 | 0 | 0 | 1 | 0 | 0 | 0 | 4 |
| hsa-miR-708 | SLC24A3  | 1 | 1 | 0 | 1 | 0 | 0 | 1 | 0 | 0 | 1 | 5 |
| hsa-miR-708 | SLC25A10 | 1 | 1 | 0 | 1 | 0 | 0 | 1 | 0 | 0 | 1 | 5 |
| hsa-miR-708 | SLC25A12 | 1 | 1 | 0 | 1 | 0 | 0 | 1 | 0 | 0 | 1 | 5 |
| hsa-miR-708 | SLC25A25 | 1 | 1 | 0 | 1 | 0 | 0 | 1 | 0 | 0 | 0 | 4 |
| hsa-miR-708 | SLC25A29 | 1 | 1 | 0 | 1 | 0 | 0 | 1 | 0 | 0 | 1 | 5 |
| hsa-miR-708 | SLC25A44 | 1 | 1 | 0 | 1 | 0 | 0 | 1 | 0 | 0 | 0 | 4 |
| hsa-miR-708 | SLC25A45 | 1 | 1 | 0 | 1 | 0 | 0 | 1 | 0 | 0 | 1 | 5 |
| hsa-miR-708 | SLC27A1  | 1 | 1 | 0 | 1 | 0 | 0 | 1 | 0 | 0 | 1 | 5 |
| hsa-miR-708 | SLC2A1   | 1 | 1 | 0 | 1 | 0 | 0 | 1 | 0 | 0 | 0 | 4 |
| hsa-miR-708 | SLC2A12  | 1 | 1 | 0 | 1 | 0 | 0 | 1 | 0 | 0 | 1 | 5 |
| hsa-miR-708 | SLC2A6   | 1 | 1 | 0 | 1 | 0 | 0 | 1 | 0 | 0 | 1 | 5 |
| hsa-miR-708 | SLC2A8   | 1 | 1 | 0 | 1 | 0 | 0 | 1 | 0 | 0 | 1 | 5 |
| hsa-miR-708 | SLC30A2  | 1 | 1 | 0 | 1 | 0 | 0 | 1 | 0 | 0 | 1 | 5 |
| hsa-miR-708 | SLC31A1  | 1 | 1 | 0 | 1 | 0 | 0 | 1 | 0 | 0 | 1 | 5 |
| hsa-miR-708 | SLC31A2  | 1 | 1 | 0 | 1 | 0 | 0 | 1 | 0 | 0 | 1 | 5 |
| hsa-miR-708 | SLC35C1  | 1 | 0 | 0 | 1 | 0 | 0 | 1 | 0 | 0 | 1 | 4 |
| hsa-miR-708 | SLC35E1  | 1 | 1 | 0 | 1 | 0 | 0 | 1 | 0 | 0 | 1 | 5 |
| hsa-miR-708 | SLC37A2  | 1 | 1 | 0 | 1 | 0 | 0 | 1 | 0 | 0 | 0 | 4 |
| hsa-miR-708 | SLC37A4  | 1 | 0 | 1 | 1 | 0 | 0 | 1 | 0 | 0 | 1 | 5 |
| hsa-miR-708 | SLC38A2  | 1 | 1 | 0 | 1 | 0 | 0 | 1 | 0 | 0 | 1 | 5 |
| hsa-miR-708 | SLC39A9  | 1 | 1 | 0 | 1 | 0 | 0 | 1 | 0 | 0 | 1 | 5 |
| hsa-miR-708 | SLC45A4  | 1 | 1 | 0 | 1 | 0 | 0 | 1 | 0 | 0 | 1 | 5 |
| hsa-miR-708 | SLC46A3  | 1 | 1 | 0 | 1 | 0 | 0 | 1 | 0 | 0 | 1 | 5 |
| hsa-miR-708 | SLC4A11  | 1 | 1 | 1 | 1 | 0 | 0 | 1 | 0 | 0 | 1 | 6 |

|             |         |   |   |   |   |   |   |   |   |   |   |   |
|-------------|---------|---|---|---|---|---|---|---|---|---|---|---|
| hsa-miR-708 | SLC6A1  | 1 | 1 | 0 | 1 | 0 | 0 | 1 | 0 | 0 | 1 | 5 |
| hsa-miR-708 | SLC6A12 | 1 | 1 | 0 | 1 | 0 | 0 | 0 | 0 | 0 | 1 | 4 |
| hsa-miR-708 | SLC6A2  | 1 | 1 | 0 | 0 | 0 | 0 | 1 | 0 | 0 | 1 | 4 |
| hsa-miR-708 | SLC6A6  | 1 | 1 | 0 | 1 | 0 | 0 | 0 | 0 | 0 | 1 | 4 |
| hsa-miR-708 | SLC6A7  | 1 | 1 | 0 | 1 | 0 | 0 | 1 | 0 | 0 | 0 | 4 |
| hsa-miR-708 | SLC7A1  | 1 | 1 | 0 | 1 | 0 | 0 | 1 | 0 | 0 | 1 | 5 |
| hsa-miR-708 | SLC7A11 | 1 | 1 | 0 | 0 | 0 | 0 | 1 | 0 | 0 | 1 | 4 |
| hsa-miR-708 | SLC7A2  | 1 | 1 | 0 | 1 | 0 | 0 | 1 | 0 | 0 | 0 | 4 |
| hsa-miR-708 | SLC7A5  | 1 | 1 | 0 | 0 | 0 | 0 | 1 | 0 | 0 | 1 | 4 |
| hsa-miR-708 | SLC8A1  | 1 | 1 | 0 | 1 | 0 | 0 | 1 | 0 | 0 | 0 | 4 |
| hsa-miR-708 | SLC9A1  | 1 | 1 | 0 | 1 | 0 | 0 | 1 | 0 | 0 | 1 | 5 |
| hsa-miR-708 | SLC9A6  | 1 | 1 | 0 | 1 | 0 | 0 | 1 | 0 | 0 | 0 | 4 |
| hsa-miR-708 | SLCO1C1 | 1 | 1 | 0 | 1 | 0 | 0 | 1 | 0 | 0 | 1 | 5 |
| hsa-miR-708 | SLITRK1 | 1 | 1 | 0 | 1 | 0 | 0 | 1 | 0 | 0 | 1 | 5 |
| hsa-miR-708 | SMAD3   | 1 | 1 | 0 | 0 | 0 | 0 | 1 | 0 | 0 | 1 | 4 |
| hsa-miR-708 | SMAD4   | 1 | 1 | 0 | 1 | 0 | 0 | 1 | 0 | 0 | 1 | 5 |
| hsa-miR-708 | SMAP2   | 1 | 1 | 0 | 1 | 0 | 0 | 1 | 0 | 0 | 1 | 5 |
| hsa-miR-708 | SMARCC1 | 1 | 1 | 0 | 1 | 0 | 0 | 1 | 0 | 0 | 1 | 5 |
| hsa-miR-708 | SMARCC2 | 1 | 1 | 0 | 1 | 0 | 0 | 1 | 0 | 0 | 1 | 5 |
| hsa-miR-708 | SMARCD1 | 1 | 1 | 0 | 0 | 0 | 0 | 1 | 0 | 0 | 1 | 4 |
| hsa-miR-708 | SMC1A   | 1 | 1 | 0 | 1 | 0 | 0 | 1 | 0 | 0 | 1 | 5 |
| hsa-miR-708 | SMC1B   | 1 | 1 | 0 | 1 | 0 | 0 | 1 | 0 | 0 | 1 | 5 |
| hsa-miR-708 | SMG1    | 1 | 1 | 0 | 0 | 0 | 0 | 1 | 0 | 0 | 1 | 4 |
| hsa-miR-708 | SMG5    | 1 | 1 | 0 | 1 | 0 | 0 | 1 | 0 | 0 | 1 | 5 |
| hsa-miR-708 | SMG7    | 1 | 1 | 0 | 1 | 0 | 0 | 1 | 0 | 0 | 1 | 5 |
| hsa-miR-708 | SMURF2  | 1 | 1 | 1 | 1 | 0 | 0 | 1 | 0 | 0 | 1 | 6 |
| hsa-miR-708 | SMYD1   | 1 | 1 | 0 | 1 | 0 | 0 | 1 | 0 | 0 | 1 | 5 |
| hsa-miR-708 | SMYD5   | 1 | 1 | 0 | 1 | 0 | 0 | 1 | 0 | 0 | 1 | 5 |
| hsa-miR-708 | SNAP23  | 1 | 1 | 0 | 1 | 0 | 0 | 1 | 0 | 0 | 1 | 5 |
| hsa-miR-708 | SNAP25  | 1 | 1 | 0 | 1 | 0 | 0 | 1 | 0 | 0 | 1 | 5 |
| hsa-miR-708 | SNCAIP  | 1 | 1 | 0 | 1 | 0 | 0 | 1 | 0 | 0 | 1 | 5 |
| hsa-miR-708 | SNF1LK2 | 1 | 1 | 1 | 1 | 0 | 0 | 1 | 0 | 0 | 1 | 6 |
| hsa-miR-708 | SNIP    | 1 | 1 | 0 | 1 | 0 | 0 | 1 | 0 | 0 | 1 | 5 |
| hsa-miR-708 | SNPH    | 1 | 1 | 0 | 0 | 0 | 0 | 1 | 0 | 0 | 1 | 4 |
| hsa-miR-708 | SNTB2   | 1 | 1 | 0 | 1 | 0 | 0 | 1 | 0 | 0 | 1 | 5 |
| hsa-miR-708 | SNUPN   | 1 | 1 | 0 | 1 | 0 | 0 | 0 | 0 | 0 | 1 | 4 |
| hsa-miR-708 | SNX1    | 1 | 1 | 0 | 1 | 0 | 0 | 1 | 0 | 0 | 1 | 5 |
| hsa-miR-708 | SNX11   | 1 | 1 | 0 | 1 | 0 | 0 | 0 | 0 | 0 | 1 | 4 |
| hsa-miR-708 | SNX19   | 1 | 1 | 0 | 1 | 0 | 0 | 1 | 0 | 0 | 1 | 5 |
| hsa-miR-708 | SNX22   | 1 | 1 | 0 | 1 | 0 | 0 | 1 | 0 | 0 | 1 | 5 |
| hsa-miR-708 | SNX27   | 1 | 1 | 0 | 1 | 0 | 0 | 1 | 0 | 0 | 1 | 5 |
| hsa-miR-708 | SNX29   | 1 | 1 | 0 | 1 | 0 | 0 | 1 | 0 | 0 | 1 | 5 |
| hsa-miR-708 | SNX33   | 1 | 1 | 0 | 1 | 0 | 0 | 1 | 0 | 0 | 1 | 5 |
| hsa-miR-708 | SOBP    | 1 | 1 | 0 | 1 | 0 | 0 | 1 | 0 | 0 | 0 | 4 |

|             |         |   |   |   |   |   |   |   |   |   |   |   |
|-------------|---------|---|---|---|---|---|---|---|---|---|---|---|
| hsa-miR-708 | SOCS7   | 1 | 1 | 0 | 1 | 0 | 0 | 1 | 0 | 0 | 1 | 5 |
| hsa-miR-708 | SOD3    | 1 | 1 | 0 | 1 | 0 | 0 | 1 | 0 | 0 | 1 | 5 |
| hsa-miR-708 | SORCS1  | 1 | 1 | 0 | 1 | 0 | 0 | 1 | 0 | 0 | 1 | 5 |
| hsa-miR-708 | SORCS2  | 1 | 1 | 0 | 1 | 0 | 0 | 1 | 0 | 0 | 1 | 5 |
| hsa-miR-708 | SORT1   | 1 | 1 | 0 | 0 | 0 | 0 | 1 | 0 | 0 | 1 | 4 |
| hsa-miR-708 | SOX10   | 1 | 1 | 0 | 1 | 0 | 0 | 1 | 0 | 0 | 1 | 5 |
| hsa-miR-708 | SOX3    | 1 | 1 | 0 | 1 | 0 | 0 | 1 | 0 | 0 | 0 | 4 |
| hsa-miR-708 | SP1     | 1 | 1 | 0 | 0 | 0 | 0 | 1 | 0 | 0 | 1 | 4 |
| hsa-miR-708 | SP100   | 0 | 1 | 0 | 1 | 0 | 0 | 1 | 0 | 0 | 1 | 4 |
| hsa-miR-708 | SPAG1   | 1 | 0 | 0 | 1 | 0 | 0 | 1 | 0 | 0 | 1 | 4 |
| hsa-miR-708 | SPARC   | 0 | 1 | 1 | 1 | 0 | 0 | 1 | 0 | 0 | 1 | 5 |
| hsa-miR-708 | SPATA8  | 1 | 1 | 0 | 1 | 0 | 0 | 1 | 0 | 0 | 1 | 5 |
| hsa-miR-708 | SPHK1   | 1 | 1 | 0 | 1 | 0 | 0 | 1 | 0 | 0 | 1 | 5 |
| hsa-miR-708 | SPINT1  | 1 | 0 | 0 | 1 | 0 | 0 | 1 | 0 | 0 | 1 | 4 |
| hsa-miR-708 | SPOCK2  | 1 | 1 | 0 | 1 | 0 | 0 | 1 | 0 | 0 | 1 | 5 |
| hsa-miR-708 | SPRR1A  | 1 | 1 | 0 | 1 | 0 | 0 | 1 | 0 | 0 | 0 | 4 |
| hsa-miR-708 | SPRYD3  | 0 | 1 | 0 | 1 | 0 | 0 | 1 | 0 | 0 | 1 | 4 |
| hsa-miR-708 | SPTA1   | 0 | 1 | 0 | 1 | 0 | 0 | 1 | 0 | 0 | 1 | 4 |
| hsa-miR-708 | SPTB    | 1 | 1 | 0 | 1 | 0 | 0 | 1 | 0 | 0 | 1 | 5 |
| hsa-miR-708 | SPTBN5  | 1 | 1 | 0 | 0 | 0 | 0 | 1 | 0 | 0 | 1 | 4 |
| hsa-miR-708 | SPTLC2  | 1 | 1 | 0 | 1 | 0 | 0 | 1 | 0 | 0 | 1 | 5 |
| hsa-miR-708 | SQSTM1  | 1 | 1 | 0 | 1 | 0 | 0 | 1 | 0 | 0 | 0 | 4 |
| hsa-miR-708 | SRCRB4D | 1 | 1 | 0 | 0 | 0 | 0 | 1 | 0 | 0 | 1 | 4 |
| hsa-miR-708 | SRD5A1  | 1 | 1 | 0 | 1 | 0 | 0 | 1 | 0 | 0 | 1 | 5 |
| hsa-miR-708 | SRF     | 1 | 1 | 0 | 1 | 0 | 0 | 1 | 0 | 0 | 1 | 5 |
| hsa-miR-708 | SRGAP2  | 1 | 1 | 0 | 0 | 0 | 0 | 1 | 0 | 0 | 1 | 4 |
| hsa-miR-708 | SRGAP3  | 1 | 1 | 0 | 1 | 0 | 0 | 1 | 0 | 0 | 1 | 5 |
| hsa-miR-708 | SRL     | 1 | 1 | 0 | 0 | 0 | 0 | 1 | 0 | 0 | 1 | 4 |
| hsa-miR-708 | SRP72   | 1 | 1 | 0 | 1 | 0 | 0 | 1 | 0 | 0 | 1 | 5 |
| hsa-miR-708 | SRPR    | 1 | 1 | 0 | 1 | 0 | 0 | 1 | 0 | 0 | 1 | 5 |
| hsa-miR-708 | SRPRB   | 1 | 1 | 1 | 1 | 0 | 0 | 1 | 0 | 0 | 1 | 6 |
| hsa-miR-708 | SRPX2   | 1 | 1 | 0 | 1 | 0 | 0 | 1 | 0 | 0 | 1 | 5 |
| hsa-miR-708 | SRRD    | 1 | 1 | 1 | 1 | 0 | 0 | 1 | 0 | 0 | 1 | 6 |
| hsa-miR-708 | SRY     | 1 | 1 | 0 | 1 | 0 | 0 | 1 | 0 | 0 | 0 | 4 |
| hsa-miR-708 | SS18L2  | 1 | 1 | 0 | 1 | 0 | 0 | 1 | 0 | 0 | 0 | 4 |
| hsa-miR-708 | SSH2    | 1 | 1 | 0 | 1 | 0 | 0 | 1 | 0 | 0 | 1 | 5 |
| hsa-miR-708 | SSRP1   | 1 | 1 | 0 | 1 | 0 | 0 | 1 | 0 | 0 | 1 | 5 |
| hsa-miR-708 | ST7     | 1 | 1 | 0 | 1 | 0 | 0 | 1 | 0 | 0 | 1 | 5 |
| hsa-miR-708 | ST7L    | 1 | 1 | 0 | 1 | 0 | 0 | 1 | 0 | 0 | 1 | 5 |
| hsa-miR-708 | ST8SIA2 | 1 | 1 | 0 | 1 | 0 | 0 | 1 | 0 | 0 | 1 | 5 |
| hsa-miR-708 | ST8SIA3 | 1 | 1 | 0 | 1 | 0 | 0 | 1 | 0 | 0 | 1 | 5 |
| hsa-miR-708 | STAC2   | 1 | 1 | 0 | 1 | 0 | 0 | 1 | 0 | 0 | 0 | 4 |
| hsa-miR-708 | STAM2   | 1 | 1 | 0 | 1 | 0 | 0 | 1 | 0 | 0 | 1 | 5 |
| hsa-miR-708 | STARD8  | 1 | 0 | 0 | 1 | 0 | 0 | 1 | 0 | 0 | 1 | 4 |



|             |         |   |   |   |   |   |   |   |   |   |   |   |
|-------------|---------|---|---|---|---|---|---|---|---|---|---|---|
| hsa-miR-708 | STC1    | 1 | 1 | 0 | 1 | 0 | 0 | 1 | 0 | 0 | 0 | 4 |
| hsa-miR-708 | STC2    | 1 | 1 | 0 | 1 | 0 | 0 | 1 | 0 | 0 | 1 | 5 |
| hsa-miR-708 | STEAP4  | 1 | 1 | 0 | 1 | 0 | 0 | 1 | 0 | 0 | 0 | 4 |
| hsa-miR-708 | STK24   | 1 | 1 | 0 | 1 | 0 | 0 | 1 | 0 | 0 | 1 | 5 |
| hsa-miR-708 | STK32A  | 1 | 1 | 0 | 1 | 0 | 0 | 0 | 0 | 0 | 1 | 4 |
| hsa-miR-708 | STK35   | 1 | 1 | 0 | 1 | 0 | 0 | 1 | 0 | 0 | 1 | 5 |
| hsa-miR-708 | STK36   | 1 | 1 | 0 | 1 | 0 | 0 | 1 | 0 | 0 | 1 | 5 |
| hsa-miR-708 | STK4    | 1 | 1 | 0 | 1 | 0 | 0 | 1 | 0 | 0 | 1 | 5 |
| hsa-miR-708 | STOM    | 1 | 1 | 0 | 1 | 0 | 0 | 1 | 0 | 0 | 1 | 5 |
| hsa-miR-708 | STOML3  | 1 | 1 | 0 | 1 | 0 | 0 | 1 | 0 | 0 | 1 | 5 |
| hsa-miR-708 | STRN4   | 1 | 1 | 0 | 1 | 0 | 0 | 1 | 0 | 0 | 1 | 5 |
| hsa-miR-708 | STS     | 1 | 1 | 0 | 1 | 0 | 0 | 1 | 0 | 0 | 1 | 5 |
| hsa-miR-708 | STX16   | 1 | 1 | 1 | 0 | 0 | 0 | 1 | 0 | 0 | 1 | 5 |
| hsa-miR-708 | STX6    | 1 | 1 | 0 | 1 | 0 | 0 | 1 | 0 | 0 | 1 | 5 |
| hsa-miR-708 | STXBP6  | 1 | 1 | 0 | 1 | 0 | 0 | 1 | 0 | 0 | 0 | 4 |
| hsa-miR-708 | SUFU    | 1 | 1 | 0 | 1 | 0 | 0 | 1 | 0 | 0 | 1 | 5 |
| hsa-miR-708 | SUPT16H | 1 | 1 | 0 | 1 | 0 | 0 | 1 | 0 | 0 | 0 | 4 |
| hsa-miR-708 | SUPT4H1 | 1 | 1 | 0 | 1 | 0 | 0 | 1 | 0 | 0 | 1 | 5 |
| hsa-miR-708 | SUSD1   | 1 | 1 | 0 | 1 | 0 | 0 | 1 | 0 | 0 | 1 | 5 |
| hsa-miR-708 | SUV39H1 | 1 | 1 | 0 | 1 | 0 | 0 | 1 | 0 | 0 | 1 | 5 |
| hsa-miR-708 | SV2A    | 1 | 1 | 0 | 1 | 0 | 0 | 1 | 0 | 0 | 1 | 5 |
| hsa-miR-708 | SYCE2   | 1 | 1 | 0 | 1 | 0 | 0 | 1 | 0 | 0 | 1 | 5 |
| hsa-miR-708 | SYDE1   | 1 | 1 | 0 | 1 | 0 | 0 | 1 | 0 | 0 | 1 | 5 |
| hsa-miR-708 | SYN2    | 1 | 1 | 0 | 1 | 0 | 0 | 1 | 0 | 0 | 1 | 5 |
| hsa-miR-708 | SYNGR1  | 1 | 1 | 0 | 1 | 0 | 0 | 1 | 0 | 0 | 1 | 5 |
| hsa-miR-708 | SYNJ2   | 1 | 1 | 0 | 1 | 0 | 0 | 1 | 0 | 0 | 1 | 5 |
| hsa-miR-708 | SYNJ2BP | 0 | 1 | 0 | 1 | 0 | 0 | 1 | 0 | 0 | 1 | 4 |
| hsa-miR-708 | SYNPO2  | 1 | 1 | 0 | 1 | 0 | 0 | 0 | 0 | 0 | 1 | 4 |
| hsa-miR-708 | SYPL2   | 1 | 1 | 0 | 1 | 0 | 0 | 1 | 0 | 0 | 1 | 5 |
| hsa-miR-708 | SYT11   | 1 | 1 | 0 | 1 | 0 | 0 | 1 | 0 | 0 | 1 | 5 |
| hsa-miR-708 | SYT13   | 1 | 1 | 0 | 1 | 0 | 0 | 1 | 0 | 0 | 0 | 4 |
| hsa-miR-708 | SYT7    | 1 | 1 | 0 | 1 | 0 | 0 | 1 | 0 | 0 | 1 | 5 |
| hsa-miR-708 | SYT9    | 1 | 1 | 0 | 1 | 0 | 0 | 1 | 0 | 0 | 1 | 5 |
| hsa-miR-708 | TAF4    | 1 | 1 | 0 | 1 | 0 | 0 | 1 | 0 | 0 | 0 | 4 |
| hsa-miR-708 | TAGAP   | 1 | 1 | 0 | 1 | 0 | 0 | 1 | 0 | 0 | 1 | 5 |
| hsa-miR-708 | TAGLN   | 1 | 0 | 0 | 1 | 0 | 0 | 1 | 0 | 0 | 1 | 4 |
| hsa-miR-708 | TAGLN2  | 1 | 1 | 0 | 1 | 0 | 0 | 1 | 0 | 0 | 1 | 5 |
| hsa-miR-708 | TAGLN3  | 1 | 1 | 0 | 1 | 0 | 0 | 0 | 0 | 0 | 1 | 4 |
| hsa-miR-708 | TAL1    | 1 | 1 | 0 | 1 | 0 | 0 | 1 | 0 | 0 | 0 | 4 |
| hsa-miR-708 | TANC1   | 1 | 1 | 0 | 1 | 0 | 0 | 1 | 0 | 0 | 1 | 5 |
| hsa-miR-708 | TAP1    | 1 | 1 | 0 | 1 | 0 | 0 | 0 | 0 | 0 | 1 | 4 |
| hsa-miR-708 | TAZ     | 1 | 0 | 0 | 1 | 0 | 0 | 1 | 0 | 0 | 1 | 4 |
| hsa-miR-708 | TBC1D13 | 1 | 1 | 0 | 1 | 0 | 0 | 1 | 0 | 0 | 1 | 5 |
| hsa-miR-708 | TBC1D16 | 1 | 1 | 0 | 1 | 0 | 0 | 1 | 0 | 0 | 1 | 5 |

|             |          |   |   |   |   |   |   |   |   |   |   |   |
|-------------|----------|---|---|---|---|---|---|---|---|---|---|---|
| hsa-miR-708 | TBC1D24  | 1 | 1 | 0 | 0 | 0 | 0 | 1 | 0 | 0 | 1 | 4 |
| hsa-miR-708 | TBC1D26  | 0 | 1 | 0 | 1 | 0 | 0 | 1 | 0 | 0 | 1 | 4 |
| hsa-miR-708 | TBC1D2B  | 1 | 1 | 0 | 1 | 0 | 0 | 0 | 0 | 0 | 1 | 4 |
| hsa-miR-708 | TBC1D4   | 1 | 1 | 0 | 1 | 0 | 0 | 1 | 0 | 0 | 1 | 5 |
| hsa-miR-708 | TBC1D5   | 1 | 0 | 0 | 1 | 0 | 0 | 1 | 0 | 0 | 1 | 4 |
| hsa-miR-708 | TBCB     | 1 | 1 | 0 | 1 | 0 | 0 | 1 | 0 | 0 | 1 | 5 |
| hsa-miR-708 | TBKBP1   | 1 | 1 | 0 | 1 | 0 | 0 | 1 | 0 | 0 | 1 | 5 |
| hsa-miR-708 | TC2N     | 1 | 1 | 0 | 1 | 0 | 0 | 1 | 0 | 0 | 1 | 5 |
| hsa-miR-708 | TCF7     | 1 | 1 | 0 | 1 | 0 | 0 | 1 | 0 | 0 | 1 | 5 |
| hsa-miR-708 | TCTA     | 1 | 1 | 0 | 0 | 0 | 0 | 1 | 0 | 0 | 1 | 4 |
| hsa-miR-708 | TEAD3    | 1 | 1 | 0 | 1 | 0 | 0 | 1 | 0 | 0 | 1 | 5 |
| hsa-miR-708 | TEF      | 1 | 1 | 0 | 1 | 0 | 0 | 1 | 0 | 0 | 1 | 5 |
| hsa-miR-708 | TEGT     | 1 | 1 | 0 | 1 | 0 | 0 | 1 | 0 | 0 | 1 | 5 |
| hsa-miR-708 | TERF2IP  | 1 | 1 | 0 | 0 | 0 | 0 | 1 | 0 | 0 | 1 | 4 |
| hsa-miR-708 | TEX14    | 1 | 1 | 0 | 1 | 0 | 0 | 1 | 0 | 0 | 1 | 5 |
| hsa-miR-708 | TEX261   | 1 | 1 | 0 | 1 | 0 | 0 | 1 | 0 | 0 | 1 | 5 |
| hsa-miR-708 | TFAP2B   | 1 | 1 | 0 | 1 | 0 | 0 | 1 | 0 | 0 | 1 | 5 |
| hsa-miR-708 | TFCP2    | 1 | 1 | 0 | 1 | 0 | 0 | 1 | 0 | 0 | 0 | 4 |
| hsa-miR-708 | TFCP2L1  | 1 | 1 | 0 | 1 | 0 | 0 | 1 | 0 | 0 | 0 | 4 |
| hsa-miR-708 | TFEB     | 1 | 1 | 0 | 1 | 0 | 0 | 1 | 0 | 0 | 1 | 5 |
| hsa-miR-708 | TFR2     | 1 | 1 | 0 | 1 | 0 | 0 | 1 | 0 | 0 | 1 | 5 |
| hsa-miR-708 | TFRC     | 1 | 1 | 0 | 1 | 0 | 0 | 0 | 0 | 0 | 1 | 4 |
| hsa-miR-708 | TGM2     | 1 | 1 | 0 | 1 | 0 | 0 | 1 | 0 | 0 | 1 | 5 |
| hsa-miR-708 | TGM4     | 1 | 1 | 0 | 1 | 0 | 0 | 1 | 0 | 0 | 0 | 4 |
| hsa-miR-708 | TGM7     | 1 | 1 | 0 | 1 | 0 | 0 | 1 | 0 | 0 | 0 | 4 |
| hsa-miR-708 | TGOLN2   | 1 | 1 | 0 | 1 | 0 | 0 | 1 | 0 | 0 | 1 | 5 |
| hsa-miR-708 | THG1L    | 1 | 1 | 0 | 1 | 0 | 0 | 1 | 0 | 0 | 0 | 4 |
| hsa-miR-708 | THRB     | 1 | 1 | 0 | 1 | 0 | 0 | 0 | 0 | 0 | 1 | 4 |
| hsa-miR-708 | THSD4    | 1 | 1 | 0 | 1 | 0 | 0 | 1 | 0 | 0 | 1 | 5 |
| hsa-miR-708 | TIE1     | 1 | 1 | 0 | 1 | 0 | 0 | 1 | 0 | 0 | 1 | 5 |
| hsa-miR-708 | TIMELESS | 1 | 1 | 0 | 1 | 0 | 0 | 1 | 0 | 0 | 1 | 5 |
| hsa-miR-708 | TIMM17B  | 1 | 1 | 0 | 1 | 0 | 0 | 1 | 0 | 0 | 1 | 5 |
| hsa-miR-708 | TLK1     | 1 | 0 | 0 | 1 | 0 | 0 | 1 | 0 | 0 | 1 | 4 |
| hsa-miR-708 | TLN2     | 1 | 1 | 0 | 1 | 0 | 0 | 1 | 0 | 0 | 1 | 5 |
| hsa-miR-708 | TLR4     | 1 | 1 | 0 | 1 | 0 | 0 | 1 | 0 | 0 | 0 | 4 |
| hsa-miR-708 | TLR6     | 1 | 1 | 0 | 1 | 0 | 0 | 1 | 0 | 0 | 1 | 5 |
| hsa-miR-708 | TLR7     | 1 | 1 | 0 | 1 | 0 | 0 | 1 | 0 | 0 | 1 | 5 |
| hsa-miR-708 | TM4SF5   | 1 | 1 | 0 | 1 | 0 | 0 | 1 | 0 | 0 | 0 | 4 |
| hsa-miR-708 | TMCC1    | 1 | 1 | 0 | 1 | 0 | 0 | 1 | 0 | 0 | 0 | 4 |
| hsa-miR-708 | TMCC2    | 1 | 1 | 0 | 1 | 0 | 0 | 1 | 0 | 0 | 1 | 5 |
| hsa-miR-708 | TMCO3    | 1 | 1 | 0 | 1 | 0 | 0 | 1 | 0 | 0 | 0 | 4 |
| hsa-miR-708 | TMCO6    | 1 | 1 | 0 | 1 | 0 | 0 | 1 | 0 | 0 | 1 | 5 |
| hsa-miR-708 | TMCO7    | 1 | 1 | 0 | 1 | 0 | 0 | 1 | 0 | 0 | 0 | 4 |
| hsa-miR-708 | TMEM1    | 1 | 1 | 0 | 1 | 0 | 0 | 1 | 0 | 0 | 0 | 4 |

|             |           |   |   |   |   |   |   |   |   |   |   |   |
|-------------|-----------|---|---|---|---|---|---|---|---|---|---|---|
| hsa-miR-708 | TMEM104   | 0 | 1 | 0 | 1 | 0 | 0 | 1 | 0 | 0 | 1 | 4 |
| hsa-miR-708 | TMEM106B  | 1 | 1 | 0 | 1 | 0 | 0 | 0 | 0 | 0 | 1 | 4 |
| hsa-miR-708 | TMEM109   | 1 | 1 | 0 | 1 | 0 | 0 | 1 | 0 | 0 | 1 | 5 |
| hsa-miR-708 | TMEM115   | 1 | 1 | 0 | 1 | 0 | 0 | 1 | 0 | 0 | 1 | 5 |
| hsa-miR-708 | TMEM121   | 1 | 1 | 0 | 1 | 0 | 0 | 1 | 0 | 0 | 0 | 4 |
| hsa-miR-708 | TMEM127   | 1 | 1 | 1 | 1 | 0 | 0 | 1 | 0 | 0 | 1 | 6 |
| hsa-miR-708 | TMEM132B  | 1 | 1 | 0 | 1 | 0 | 0 | 1 | 0 | 0 | 1 | 5 |
| hsa-miR-708 | TMEM156   | 1 | 1 | 0 | 1 | 0 | 0 | 1 | 0 | 0 | 1 | 5 |
| hsa-miR-708 | TMEM16G   | 0 | 1 | 0 | 1 | 0 | 0 | 1 | 0 | 0 | 1 | 4 |
| hsa-miR-708 | TMEM16K   | 1 | 1 | 0 | 1 | 0 | 0 | 1 | 0 | 0 | 0 | 4 |
| hsa-miR-708 | TMEM170   | 1 | 1 | 1 | 1 | 0 | 0 | 1 | 0 | 0 | 1 | 6 |
| hsa-miR-708 | TMEM18    | 1 | 1 | 0 | 1 | 0 | 0 | 1 | 0 | 0 | 1 | 5 |
| hsa-miR-708 | TMEM180   | 1 | 1 | 0 | 1 | 0 | 0 | 1 | 0 | 0 | 1 | 5 |
| hsa-miR-708 | TMEM184A  | 1 | 1 | 0 | 1 | 0 | 0 | 1 | 0 | 0 | 1 | 5 |
| hsa-miR-708 | TMEM184B  | 1 | 1 | 0 | 1 | 0 | 0 | 1 | 0 | 0 | 1 | 5 |
| hsa-miR-708 | TMEM188   | 0 | 1 | 0 | 1 | 0 | 0 | 1 | 0 | 0 | 1 | 4 |
| hsa-miR-708 | TMEM194   | 1 | 1 | 0 | 1 | 0 | 0 | 0 | 0 | 0 | 1 | 4 |
| hsa-miR-708 | TMEM200B  | 0 | 1 | 0 | 1 | 0 | 0 | 1 | 0 | 0 | 1 | 4 |
| hsa-miR-708 | TMEM201   | 1 | 1 | 0 | 1 | 0 | 0 | 0 | 0 | 0 | 1 | 4 |
| hsa-miR-708 | TMEM28    | 1 | 1 | 0 | 1 | 0 | 0 | 1 | 0 | 0 | 0 | 4 |
| hsa-miR-708 | TMEM32    | 1 | 1 | 0 | 1 | 0 | 0 | 1 | 0 | 0 | 1 | 5 |
| hsa-miR-708 | TMEM43    | 1 | 1 | 0 | 1 | 0 | 0 | 1 | 0 | 0 | 1 | 5 |
| hsa-miR-708 | TMEM46    | 1 | 1 | 0 | 1 | 0 | 0 | 1 | 0 | 0 | 1 | 5 |
| hsa-miR-708 | TMEM59    | 1 | 1 | 0 | 1 | 0 | 0 | 1 | 0 | 0 | 0 | 4 |
| hsa-miR-708 | TMEM79    | 1 | 1 | 0 | 0 | 0 | 0 | 1 | 0 | 0 | 1 | 4 |
| hsa-miR-708 | TMEM92    | 1 | 1 | 0 | 1 | 0 | 0 | 1 | 0 | 0 | 1 | 5 |
| hsa-miR-708 | TMIE      | 1 | 1 | 0 | 1 | 0 | 0 | 1 | 0 | 0 | 0 | 4 |
| hsa-miR-708 | TMPRSS11D | 1 | 1 | 0 | 1 | 0 | 0 | 1 | 0 | 0 | 1 | 5 |
| hsa-miR-708 | TMPRSS3   | 1 | 1 | 0 | 1 | 0 | 0 | 0 | 0 | 0 | 1 | 4 |
| hsa-miR-708 | TMPRSS4   | 0 | 1 | 0 | 1 | 0 | 0 | 1 | 0 | 0 | 1 | 4 |
| hsa-miR-708 | TMTC1     | 1 | 1 | 0 | 1 | 0 | 0 | 1 | 0 | 0 | 1 | 5 |
| hsa-miR-708 | TMUB1     | 1 | 0 | 0 | 1 | 0 | 0 | 1 | 0 | 0 | 1 | 4 |
| hsa-miR-708 | TNFRSF10D | 1 | 1 | 0 | 1 | 0 | 0 | 1 | 0 | 0 | 1 | 5 |
| hsa-miR-708 | TNFRSF12A | 1 | 1 | 0 | 1 | 0 | 0 | 1 | 0 | 0 | 1 | 5 |
| hsa-miR-708 | TNFRSF13C | 1 | 1 | 0 | 1 | 0 | 0 | 1 | 0 | 0 | 1 | 5 |
| hsa-miR-708 | TNFRSF19  | 1 | 1 | 0 | 1 | 0 | 0 | 1 | 0 | 0 | 0 | 4 |
| hsa-miR-708 | TNK1      | 1 | 1 | 0 | 1 | 0 | 0 | 1 | 0 | 0 | 1 | 5 |
| hsa-miR-708 | TNNI1     | 1 | 1 | 0 | 1 | 0 | 0 | 1 | 0 | 0 | 1 | 5 |
| hsa-miR-708 | TNNT2     | 1 | 1 | 0 | 1 | 0 | 0 | 1 | 0 | 0 | 1 | 5 |
| hsa-miR-708 | TNPO1     | 1 | 0 | 0 | 1 | 0 | 0 | 1 | 0 | 0 | 1 | 4 |
| hsa-miR-708 | TNRC6A    | 1 | 1 | 0 | 1 | 0 | 0 | 1 | 0 | 0 | 0 | 4 |
| hsa-miR-708 | TNS1      | 1 | 1 | 0 | 1 | 0 | 0 | 1 | 0 | 0 | 1 | 5 |
| hsa-miR-708 | TNS3      | 1 | 1 | 0 | 1 | 0 | 0 | 1 | 0 | 0 | 1 | 5 |
| hsa-miR-708 | TNS4      | 1 | 1 | 1 | 1 | 0 | 0 | 1 | 0 | 0 | 1 | 6 |

|             |          |   |   |   |   |   |   |   |   |   |   |   |
|-------------|----------|---|---|---|---|---|---|---|---|---|---|---|
| hsa-miR-708 | TOM1L2   | 0 | 1 | 0 | 1 | 0 | 0 | 1 | 0 | 0 | 1 | 4 |
| hsa-miR-708 | TOMM34   | 1 | 1 | 0 | 1 | 0 | 0 | 1 | 0 | 0 | 1 | 5 |
| hsa-miR-708 | TOR1A    | 1 | 1 | 0 | 1 | 0 | 0 | 1 | 0 | 0 | 1 | 5 |
| hsa-miR-708 | TOR1B    | 0 | 1 | 0 | 1 | 0 | 0 | 1 | 0 | 0 | 1 | 4 |
| hsa-miR-708 | TP53INP1 | 1 | 1 | 0 | 1 | 0 | 0 | 1 | 0 | 0 | 0 | 4 |
| hsa-miR-708 | TP63     | 1 | 1 | 0 | 1 | 0 | 0 | 1 | 0 | 0 | 1 | 5 |
| hsa-miR-708 | TPI1     | 1 | 1 | 0 | 1 | 0 | 0 | 1 | 0 | 0 | 1 | 5 |
| hsa-miR-708 | TPMT     | 1 | 1 | 1 | 1 | 0 | 0 | 1 | 0 | 0 | 1 | 6 |
| hsa-miR-708 | TPPP     | 1 | 1 | 0 | 1 | 0 | 0 | 1 | 0 | 0 | 0 | 4 |
| hsa-miR-708 | TPRG1L   | 1 | 1 | 0 | 1 | 0 | 0 | 1 | 0 | 0 | 1 | 5 |
| hsa-miR-708 | TRAF1    | 1 | 1 | 0 | 1 | 0 | 0 | 1 | 0 | 0 | 1 | 5 |
| hsa-miR-708 | TRAF7    | 1 | 1 | 0 | 1 | 0 | 0 | 1 | 0 | 0 | 1 | 5 |
| hsa-miR-708 | TRAM2    | 1 | 1 | 0 | 1 | 0 | 0 | 1 | 0 | 0 | 1 | 5 |
| hsa-miR-708 | TRAT1    | 1 | 1 | 0 | 1 | 0 | 0 | 1 | 0 | 0 | 1 | 5 |
| hsa-miR-708 | TREH     | 0 | 1 | 0 | 1 | 0 | 0 | 1 | 0 | 0 | 1 | 4 |
| hsa-miR-708 | TREML4   | 1 | 1 | 0 | 1 | 0 | 0 | 1 | 0 | 0 | 1 | 5 |
| hsa-miR-708 | TRH      | 1 | 1 | 0 | 1 | 0 | 0 | 1 | 0 | 0 | 0 | 4 |
| hsa-miR-708 | TRIB2    | 1 | 1 | 0 | 1 | 0 | 0 | 1 | 0 | 0 | 1 | 5 |
| hsa-miR-708 | TRIM14   | 1 | 1 | 0 | 1 | 0 | 0 | 1 | 0 | 0 | 1 | 5 |
| hsa-miR-708 | TRIM23   | 1 | 1 | 1 | 1 | 0 | 0 | 1 | 0 | 0 | 1 | 6 |
| hsa-miR-708 | TRIM25   | 1 | 1 | 0 | 1 | 0 | 0 | 1 | 0 | 0 | 1 | 5 |
| hsa-miR-708 | TRIM33   | 1 | 1 | 0 | 1 | 0 | 0 | 1 | 0 | 0 | 0 | 4 |
| hsa-miR-708 | TRIM48   | 1 | 1 | 0 | 1 | 0 | 0 | 1 | 0 | 0 | 0 | 4 |
| hsa-miR-708 | TRIM65   | 1 | 1 | 0 | 1 | 0 | 0 | 1 | 0 | 0 | 1 | 5 |
| hsa-miR-708 | TRIM67   | 0 | 1 | 0 | 1 | 0 | 0 | 1 | 0 | 0 | 1 | 4 |
| hsa-miR-708 | TRIT1    | 1 | 1 | 0 | 1 | 0 | 0 | 1 | 0 | 0 | 1 | 5 |
| hsa-miR-708 | TRPC4AP  | 1 | 1 | 0 | 1 | 0 | 0 | 1 | 0 | 0 | 1 | 5 |
| hsa-miR-708 | TRPS1    | 1 | 1 | 0 | 1 | 0 | 0 | 1 | 0 | 0 | 1 | 5 |
| hsa-miR-708 | TRUB1    | 1 | 1 | 0 | 0 | 0 | 0 | 1 | 0 | 0 | 1 | 4 |
| hsa-miR-708 | TSC22D1  | 1 | 1 | 0 | 1 | 0 | 0 | 1 | 0 | 0 | 1 | 5 |
| hsa-miR-708 | TSPAN14  | 0 | 1 | 0 | 1 | 0 | 0 | 1 | 0 | 0 | 1 | 4 |
| hsa-miR-708 | TSPAN17  | 1 | 1 | 0 | 1 | 0 | 0 | 1 | 0 | 0 | 1 | 5 |
| hsa-miR-708 | TSPAN18  | 1 | 1 | 0 | 1 | 0 | 0 | 1 | 0 | 0 | 1 | 5 |
| hsa-miR-708 | TSPAN6   | 1 | 1 | 0 | 1 | 0 | 0 | 1 | 0 | 0 | 0 | 4 |
| hsa-miR-708 | TSPAN7   | 1 | 1 | 0 | 1 | 0 | 0 | 1 | 0 | 0 | 1 | 5 |
| hsa-miR-708 | TSPYL4   | 1 | 1 | 0 | 1 | 0 | 0 | 1 | 0 | 0 | 1 | 5 |
| hsa-miR-708 | TSSC4    | 0 | 1 | 0 | 1 | 0 | 0 | 1 | 0 | 0 | 1 | 4 |
| hsa-miR-708 | TTBK1    | 1 | 1 | 0 | 1 | 0 | 0 | 1 | 0 | 0 | 1 | 5 |
| hsa-miR-708 | TTC23    | 1 | 0 | 0 | 1 | 0 | 0 | 1 | 0 | 0 | 1 | 4 |
| hsa-miR-708 | TTC31    | 1 | 1 | 0 | 0 | 0 | 0 | 1 | 0 | 0 | 1 | 4 |
| hsa-miR-708 | TTC9     | 1 | 1 | 0 | 1 | 0 | 0 | 1 | 0 | 0 | 1 | 5 |
| hsa-miR-708 | TTL      | 1 | 1 | 0 | 0 | 0 | 0 | 1 | 0 | 0 | 1 | 4 |
| hsa-miR-708 | TTL12    | 1 | 1 | 0 | 1 | 0 | 0 | 1 | 0 | 0 | 1 | 5 |
| hsa-miR-708 | TTL3     | 1 | 1 | 0 | 1 | 0 | 0 | 0 | 0 | 0 | 1 | 4 |

|             |         |   |   |   |   |   |   |   |   |   |   |   |
|-------------|---------|---|---|---|---|---|---|---|---|---|---|---|
| hsa-miR-708 | TUB     | 1 | 1 | 0 | 1 | 0 | 0 | 1 | 0 | 0 | 1 | 5 |
| hsa-miR-708 | TUBB    | 1 | 1 | 0 | 1 | 0 | 0 | 0 | 0 | 0 | 1 | 4 |
| hsa-miR-708 | TUBB4   | 1 | 1 | 0 | 1 | 0 | 0 | 1 | 0 | 0 | 1 | 5 |
| hsa-miR-708 | TUSC5   | 1 | 1 | 0 | 0 | 0 | 0 | 1 | 0 | 0 | 1 | 4 |
| hsa-miR-708 | TXLNA   | 1 | 1 | 0 | 1 | 0 | 0 | 1 | 0 | 0 | 0 | 4 |
| hsa-miR-708 | TXNDC4  | 1 | 1 | 0 | 1 | 0 | 0 | 1 | 0 | 0 | 1 | 5 |
| hsa-miR-708 | TXNL1   | 1 | 1 | 0 | 1 | 0 | 0 | 1 | 0 | 0 | 1 | 5 |
| hsa-miR-708 | TXNL4B  | 1 | 0 | 0 | 1 | 0 | 0 | 1 | 0 | 0 | 1 | 4 |
| hsa-miR-708 | TXNRD2  | 1 | 1 | 0 | 1 | 0 | 0 | 1 | 0 | 0 | 1 | 5 |
| hsa-miR-708 | TYRO3   | 1 | 1 | 0 | 0 | 0 | 0 | 1 | 0 | 0 | 1 | 4 |
| hsa-miR-708 | UBA6    | 1 | 1 | 0 | 1 | 0 | 0 | 1 | 0 | 0 | 1 | 5 |
| hsa-miR-708 | UBAP1   | 1 | 1 | 0 | 1 | 0 | 0 | 1 | 0 | 0 | 0 | 4 |
| hsa-miR-708 | UBE2A   | 1 | 1 | 0 | 1 | 0 | 0 | 0 | 0 | 0 | 1 | 4 |
| hsa-miR-708 | UBE2G1  | 1 | 1 | 0 | 1 | 0 | 0 | 1 | 0 | 0 | 1 | 5 |
| hsa-miR-708 | UBE2G2  | 1 | 1 | 0 | 1 | 0 | 0 | 0 | 0 | 0 | 1 | 4 |
| hsa-miR-708 | UBE2J2  | 1 | 1 | 0 | 1 | 0 | 0 | 0 | 0 | 0 | 1 | 4 |
| hsa-miR-708 | UBE2N   | 1 | 1 | 0 | 1 | 0 | 0 | 1 | 0 | 0 | 1 | 5 |
| hsa-miR-708 | UBE2NL  | 1 | 1 | 0 | 1 | 0 | 0 | 1 | 0 | 0 | 0 | 4 |
| hsa-miR-708 | UBE2R2  | 1 | 1 | 1 | 1 | 0 | 0 | 1 | 0 | 0 | 1 | 6 |
| hsa-miR-708 | UBE2Z   | 1 | 1 | 0 | 1 | 0 | 0 | 1 | 0 | 0 | 1 | 5 |
| hsa-miR-708 | UBE3C   | 1 | 1 | 0 | 0 | 0 | 0 | 1 | 0 | 0 | 1 | 4 |
| hsa-miR-708 | UBFD1   | 1 | 1 | 0 | 1 | 0 | 0 | 1 | 0 | 0 | 1 | 5 |
| hsa-miR-708 | UBL4A   | 1 | 1 | 0 | 1 | 0 | 0 | 1 | 0 | 0 | 1 | 5 |
| hsa-miR-708 | UBN1    | 1 | 0 | 0 | 1 | 0 | 0 | 1 | 0 | 0 | 1 | 4 |
| hsa-miR-708 | UBQLNL  | 1 | 1 | 0 | 1 | 0 | 0 | 1 | 0 | 0 | 1 | 5 |
| hsa-miR-708 | UBTD1   | 1 | 1 | 0 | 1 | 0 | 0 | 1 | 0 | 0 | 0 | 4 |
| hsa-miR-708 | UBTD2   | 1 | 1 | 0 | 1 | 0 | 0 | 1 | 0 | 0 | 1 | 5 |
| hsa-miR-708 | UBTF    | 1 | 1 | 0 | 1 | 0 | 0 | 0 | 0 | 0 | 1 | 4 |
| hsa-miR-708 | UBXD7   | 1 | 1 | 0 | 1 | 0 | 0 | 1 | 0 | 0 | 0 | 4 |
| hsa-miR-708 | UBXD8   | 1 | 1 | 0 | 1 | 0 | 0 | 1 | 0 | 0 | 1 | 5 |
| hsa-miR-708 | UCP2    | 1 | 1 | 0 | 1 | 0 | 0 | 1 | 0 | 0 | 0 | 4 |
| hsa-miR-708 | ULBP1   | 1 | 1 | 0 | 1 | 0 | 0 | 1 | 0 | 0 | 1 | 5 |
| hsa-miR-708 | ULK1    | 1 | 1 | 0 | 1 | 0 | 0 | 1 | 0 | 0 | 1 | 5 |
| hsa-miR-708 | ULK3    | 1 | 1 | 0 | 1 | 0 | 0 | 1 | 0 | 0 | 1 | 5 |
| hsa-miR-708 | UNC119  | 1 | 1 | 0 | 1 | 0 | 0 | 1 | 0 | 0 | 0 | 4 |
| hsa-miR-708 | UNC119B | 1 | 1 | 0 | 1 | 0 | 0 | 1 | 0 | 0 | 1 | 5 |
| hsa-miR-708 | UNC45B  | 1 | 1 | 0 | 1 | 0 | 0 | 1 | 0 | 0 | 1 | 5 |
| hsa-miR-708 | UNC5A   | 1 | 1 | 0 | 0 | 0 | 0 | 1 | 0 | 0 | 1 | 4 |
| hsa-miR-708 | UNK     | 1 | 1 | 1 | 1 | 0 | 0 | 1 | 0 | 0 | 1 | 6 |
| hsa-miR-708 | UPB1    | 1 | 1 | 0 | 1 | 0 | 0 | 1 | 0 | 0 | 1 | 5 |
| hsa-miR-708 | UPF1    | 1 | 1 | 0 | 1 | 0 | 0 | 1 | 0 | 0 | 0 | 4 |
| hsa-miR-708 | UPK3B   | 0 | 1 | 0 | 1 | 0 | 0 | 1 | 0 | 0 | 1 | 4 |
| hsa-miR-708 | UQCR    | 1 | 1 | 0 | 1 | 0 | 0 | 1 | 0 | 0 | 1 | 5 |
| hsa-miR-708 | URG4    | 1 | 1 | 0 | 1 | 0 | 0 | 0 | 0 | 0 | 1 | 4 |

|             |        |   |   |   |   |   |   |   |   |   |   |   |
|-------------|--------|---|---|---|---|---|---|---|---|---|---|---|
| hsa-miR-708 | UROD   | 1 | 1 | 0 | 1 | 0 | 0 | 1 | 0 | 0 | 0 | 4 |
| hsa-miR-708 | USH1G  | 1 | 1 | 0 | 1 | 0 | 0 | 1 | 0 | 0 | 1 | 5 |
| hsa-miR-708 | USH2A  | 1 | 1 | 0 | 0 | 0 | 0 | 1 | 0 | 0 | 1 | 4 |
| hsa-miR-708 | USP22  | 1 | 1 | 0 | 1 | 0 | 0 | 1 | 0 | 0 | 1 | 5 |
| hsa-miR-708 | USP31  | 0 | 1 | 0 | 1 | 0 | 0 | 1 | 0 | 0 | 1 | 4 |
| hsa-miR-708 | USP39  | 1 | 1 | 0 | 1 | 0 | 0 | 1 | 0 | 0 | 0 | 4 |
| hsa-miR-708 | USP9X  | 1 | 1 | 1 | 1 | 0 | 0 | 1 | 0 | 0 | 1 | 6 |
| hsa-miR-708 | USP9Y  | 1 | 1 | 1 | 1 | 0 | 0 | 1 | 0 | 0 | 1 | 6 |
| hsa-miR-708 | UVRAG  | 1 | 1 | 0 | 0 | 0 | 0 | 1 | 0 | 0 | 1 | 4 |
| hsa-miR-708 | VAC14  | 1 | 1 | 0 | 1 | 0 | 0 | 1 | 0 | 0 | 1 | 5 |
| hsa-miR-708 | VAMP2  | 0 | 1 | 0 | 1 | 0 | 0 | 1 | 0 | 0 | 1 | 4 |
| hsa-miR-708 | VANGL1 | 1 | 1 | 0 | 1 | 0 | 0 | 1 | 0 | 0 | 1 | 5 |
| hsa-miR-708 | VANGL2 | 1 | 1 | 0 | 1 | 0 | 0 | 1 | 0 | 0 | 1 | 5 |
| hsa-miR-708 | VAPB   | 1 | 1 | 0 | 1 | 0 | 0 | 1 | 0 | 0 | 1 | 5 |
| hsa-miR-708 | VASH1  | 1 | 1 | 0 | 1 | 0 | 0 | 1 | 0 | 0 | 1 | 5 |
| hsa-miR-708 | VASH2  | 1 | 1 | 0 | 1 | 0 | 0 | 1 | 0 | 0 | 0 | 4 |
| hsa-miR-708 | VASP   | 1 | 1 | 0 | 1 | 0 | 0 | 1 | 0 | 0 | 0 | 4 |
| hsa-miR-708 | VAV2   | 1 | 1 | 0 | 1 | 0 | 0 | 0 | 0 | 0 | 1 | 4 |
| hsa-miR-708 | VEZF1  | 1 | 1 | 0 | 1 | 0 | 0 | 1 | 0 | 0 | 1 | 5 |
| hsa-miR-708 | VEZT   | 0 | 1 | 0 | 1 | 0 | 0 | 1 | 0 | 0 | 1 | 4 |
| hsa-miR-708 | VGLL3  | 1 | 1 | 0 | 0 | 0 | 0 | 1 | 0 | 0 | 1 | 4 |
| hsa-miR-708 | VGLL4  | 1 | 1 | 0 | 1 | 0 | 0 | 0 | 0 | 0 | 1 | 4 |
| hsa-miR-708 | VIPR1  | 1 | 1 | 0 | 1 | 0 | 0 | 1 | 0 | 0 | 1 | 5 |
| hsa-miR-708 | VIPR2  | 1 | 1 | 0 | 1 | 0 | 0 | 1 | 0 | 0 | 0 | 4 |
| hsa-miR-708 | VPS13A | 1 | 1 | 0 | 1 | 0 | 0 | 1 | 0 | 0 | 1 | 5 |
| hsa-miR-708 | VPS13D | 1 | 1 | 0 | 1 | 0 | 0 | 1 | 0 | 0 | 1 | 5 |
| hsa-miR-708 | VPS16  | 1 | 1 | 0 | 1 | 0 | 0 | 1 | 0 | 0 | 1 | 5 |
| hsa-miR-708 | VPS37B | 1 | 1 | 0 | 1 | 0 | 0 | 1 | 0 | 0 | 1 | 5 |
| hsa-miR-708 | VPS39  | 1 | 1 | 0 | 1 | 0 | 0 | 1 | 0 | 0 | 1 | 5 |
| hsa-miR-708 | VPS4A  | 1 | 1 | 0 | 1 | 0 | 0 | 1 | 0 | 0 | 1 | 5 |
| hsa-miR-708 | VWA3A  | 1 | 1 | 0 | 1 | 0 | 0 | 1 | 0 | 0 | 1 | 5 |
| hsa-miR-708 | WASF3  | 1 | 1 | 0 | 1 | 0 | 0 | 1 | 0 | 0 | 1 | 5 |
| hsa-miR-708 | WDR26  | 1 | 1 | 0 | 1 | 0 | 0 | 1 | 0 | 0 | 0 | 4 |
| hsa-miR-708 | WDR27  | 1 | 1 | 0 | 1 | 0 | 0 | 1 | 0 | 0 | 1 | 5 |
| hsa-miR-708 | WDR32  | 1 | 1 | 0 | 1 | 0 | 0 | 1 | 0 | 0 | 1 | 5 |
| hsa-miR-708 | WDR35  | 1 | 1 | 0 | 1 | 0 | 0 | 1 | 0 | 0 | 0 | 4 |
| hsa-miR-708 | WDR37  | 1 | 1 | 0 | 1 | 0 | 0 | 1 | 0 | 0 | 1 | 5 |
| hsa-miR-708 | WDR40A | 1 | 1 | 0 | 1 | 0 | 0 | 1 | 0 | 0 | 0 | 4 |
| hsa-miR-708 | WDR5   | 1 | 1 | 0 | 0 | 0 | 0 | 1 | 0 | 0 | 1 | 4 |
| hsa-miR-708 | WDR68  | 1 | 1 | 0 | 1 | 0 | 0 | 1 | 0 | 0 | 1 | 5 |
| hsa-miR-708 | WDR76  | 1 | 1 | 0 | 1 | 0 | 0 | 1 | 0 | 0 | 1 | 5 |
| hsa-miR-708 | WHSC1  | 1 | 1 | 0 | 1 | 0 | 0 | 0 | 0 | 0 | 1 | 4 |
| hsa-miR-708 | WIPF1  | 1 | 0 | 0 | 1 | 0 | 0 | 1 | 0 | 0 | 1 | 4 |
| hsa-miR-708 | WIPF2  | 1 | 1 | 1 | 1 | 0 | 0 | 1 | 0 | 0 | 1 | 6 |

|             |          |   |   |   |   |   |   |   |   |   |   |   |
|-------------|----------|---|---|---|---|---|---|---|---|---|---|---|
| hsa-miR-708 | WIP12    | 1 | 0 | 0 | 1 | 0 | 0 | 1 | 0 | 0 | 1 | 4 |
| hsa-miR-708 | WNT10B   | 1 | 1 | 0 | 1 | 0 | 0 | 1 | 0 | 0 | 0 | 4 |
| hsa-miR-708 | WNT2B    | 1 | 1 | 0 | 1 | 0 | 0 | 1 | 0 | 0 | 0 | 4 |
| hsa-miR-708 | WNT4     | 0 | 1 | 0 | 1 | 0 | 0 | 1 | 0 | 0 | 1 | 4 |
| hsa-miR-708 | WNT5B    | 1 | 1 | 0 | 1 | 0 | 0 | 1 | 0 | 0 | 1 | 5 |
| hsa-miR-708 | WNT7B    | 1 | 1 | 0 | 1 | 0 | 0 | 1 | 0 | 0 | 0 | 4 |
| hsa-miR-708 | WNT8B    | 1 | 1 | 0 | 1 | 0 | 0 | 1 | 0 | 0 | 1 | 5 |
| hsa-miR-708 | WSB2     | 1 | 1 | 1 | 1 | 0 | 0 | 1 | 0 | 0 | 1 | 6 |
| hsa-miR-708 | WSCD1    | 1 | 1 | 0 | 1 | 0 | 0 | 1 | 0 | 0 | 1 | 5 |
| hsa-miR-708 | XAF1     | 1 | 1 | 0 | 1 | 0 | 0 | 0 | 0 | 0 | 1 | 4 |
| hsa-miR-708 | XDH      | 1 | 1 | 0 | 1 | 0 | 0 | 1 | 0 | 0 | 1 | 5 |
| hsa-miR-708 | XIRP1    | 1 | 1 | 0 | 1 | 0 | 0 | 1 | 0 | 0 | 0 | 4 |
| hsa-miR-708 | XK       | 1 | 1 | 0 | 1 | 0 | 0 | 1 | 0 | 0 | 1 | 5 |
| hsa-miR-708 | XPR1     | 0 | 1 | 0 | 1 | 0 | 0 | 1 | 0 | 0 | 1 | 4 |
| hsa-miR-708 | XYLT1    | 1 | 1 | 0 | 0 | 0 | 0 | 1 | 0 | 0 | 1 | 4 |
| hsa-miR-708 | YEATS2   | 1 | 1 | 0 | 1 | 0 | 0 | 1 | 0 | 0 | 0 | 4 |
| hsa-miR-708 | YES1     | 1 | 1 | 0 | 1 | 0 | 0 | 1 | 0 | 0 | 1 | 5 |
| hsa-miR-708 | YIPF2    | 1 | 1 | 0 | 1 | 0 | 0 | 1 | 0 | 0 | 0 | 4 |
| hsa-miR-708 | YIPF3    | 1 | 1 | 0 | 1 | 0 | 0 | 1 | 0 | 0 | 1 | 5 |
| hsa-miR-708 | YPEL1    | 1 | 1 | 0 | 1 | 0 | 0 | 1 | 0 | 0 | 1 | 5 |
| hsa-miR-708 | YPEL2    | 1 | 1 | 0 | 1 | 0 | 0 | 1 | 0 | 0 | 1 | 5 |
| hsa-miR-708 | YPEL3    | 1 | 0 | 1 | 1 | 0 | 0 | 1 | 0 | 0 | 1 | 5 |
| hsa-miR-708 | YWHAH    | 1 | 1 | 0 | 1 | 0 | 0 | 1 | 0 | 0 | 1 | 5 |
| hsa-miR-708 | YWHAZ    | 1 | 0 | 0 | 1 | 0 | 0 | 1 | 0 | 0 | 1 | 4 |
| hsa-miR-708 | ZADH2    | 1 | 1 | 0 | 1 | 0 | 0 | 1 | 0 | 0 | 1 | 5 |
| hsa-miR-708 | ZAK      | 1 | 0 | 0 | 1 | 0 | 0 | 1 | 0 | 0 | 1 | 4 |
| hsa-miR-708 | ZBED4    | 1 | 1 | 0 | 1 | 0 | 0 | 1 | 0 | 0 | 1 | 5 |
| hsa-miR-708 | ZBTB46   | 1 | 1 | 0 | 1 | 0 | 0 | 1 | 0 | 0 | 1 | 5 |
| hsa-miR-708 | ZBTB47   | 1 | 1 | 0 | 1 | 0 | 0 | 1 | 0 | 0 | 1 | 5 |
| hsa-miR-708 | ZBTB5    | 1 | 1 | 0 | 1 | 0 | 0 | 1 | 0 | 0 | 1 | 5 |
| hsa-miR-708 | ZBTB6    | 1 | 1 | 0 | 1 | 0 | 0 | 1 | 0 | 0 | 1 | 5 |
| hsa-miR-708 | ZC3H12B  | 1 | 1 | 0 | 1 | 0 | 0 | 1 | 0 | 0 | 1 | 5 |
| hsa-miR-708 | ZC3H6    | 1 | 1 | 0 | 1 | 0 | 0 | 1 | 0 | 0 | 1 | 5 |
| hsa-miR-708 | ZC3HAV1L | 1 | 1 | 0 | 1 | 0 | 0 | 1 | 0 | 0 | 1 | 5 |
| hsa-miR-708 | ZDHHC18  | 1 | 1 | 0 | 1 | 0 | 0 | 1 | 0 | 0 | 1 | 5 |
| hsa-miR-708 | ZFAT     | 1 | 1 | 0 | 1 | 0 | 0 | 1 | 0 | 0 | 1 | 5 |
| hsa-miR-708 | ZFHX3    | 1 | 1 | 0 | 0 | 0 | 0 | 1 | 0 | 0 | 1 | 4 |
| hsa-miR-708 | ZFP106   | 1 | 1 | 0 | 1 | 0 | 0 | 1 | 0 | 0 | 1 | 5 |
| hsa-miR-708 | ZFP14    | 1 | 1 | 0 | 1 | 0 | 0 | 1 | 0 | 0 | 1 | 5 |
| hsa-miR-708 | ZFP41    | 1 | 1 | 0 | 1 | 0 | 0 | 1 | 0 | 0 | 0 | 4 |
| hsa-miR-708 | ZFP91    | 1 | 1 | 0 | 1 | 0 | 0 | 1 | 0 | 0 | 1 | 5 |
| hsa-miR-708 | ZFYVE1   | 1 | 1 | 0 | 0 | 0 | 0 | 1 | 0 | 0 | 1 | 4 |
| hsa-miR-708 | ZFYVE21  | 1 | 1 | 0 | 1 | 0 | 0 | 1 | 0 | 0 | 0 | 4 |
| hsa-miR-708 | ZFYVE26  | 1 | 1 | 0 | 1 | 0 | 0 | 1 | 0 | 0 | 1 | 5 |

|             |         |   |   |   |   |   |   |   |   |   |   |   |
|-------------|---------|---|---|---|---|---|---|---|---|---|---|---|
| hsa-miR-708 | ZHX3    | 1 | 1 | 0 | 1 | 0 | 0 | 1 | 0 | 0 | 1 | 5 |
| hsa-miR-708 | ZIC4    | 1 | 1 | 0 | 0 | 0 | 0 | 1 | 0 | 0 | 1 | 4 |
| hsa-miR-708 | ZIK1    | 1 | 1 | 1 | 1 | 0 | 0 | 1 | 0 | 0 | 1 | 6 |
| hsa-miR-708 | ZMIZ2   | 1 | 1 | 0 | 1 | 0 | 0 | 1 | 0 | 0 | 1 | 5 |
| hsa-miR-708 | ZMYND8  | 1 | 1 | 0 | 1 | 0 | 0 | 1 | 0 | 0 | 0 | 4 |
| hsa-miR-708 | ZNF10   | 1 | 1 | 0 | 1 | 0 | 0 | 1 | 0 | 0 | 1 | 5 |
| hsa-miR-708 | ZNF14   | 0 | 1 | 0 | 1 | 0 | 0 | 1 | 0 | 0 | 1 | 4 |
| hsa-miR-708 | ZNF19   | 1 | 1 | 0 | 1 | 0 | 0 | 1 | 0 | 0 | 1 | 5 |
| hsa-miR-708 | ZNF192  | 1 | 1 | 1 | 1 | 0 | 0 | 1 | 0 | 0 | 1 | 6 |
| hsa-miR-708 | ZNF213  | 1 | 1 | 0 | 1 | 0 | 0 | 1 | 0 | 0 | 0 | 4 |
| hsa-miR-708 | ZNF217  | 1 | 1 | 0 | 1 | 0 | 0 | 1 | 0 | 0 | 1 | 5 |
| hsa-miR-708 | ZNF22   | 1 | 1 | 0 | 1 | 0 | 0 | 1 | 0 | 0 | 1 | 5 |
| hsa-miR-708 | ZNF25   | 1 | 1 | 0 | 1 | 0 | 0 | 1 | 0 | 0 | 1 | 5 |
| hsa-miR-708 | ZNF275  | 1 | 1 | 0 | 1 | 0 | 0 | 1 | 0 | 0 | 1 | 5 |
| hsa-miR-708 | ZNF282  | 1 | 1 | 0 | 0 | 0 | 0 | 1 | 0 | 0 | 1 | 4 |
| hsa-miR-708 | ZNF319  | 1 | 1 | 0 | 1 | 0 | 0 | 1 | 0 | 0 | 1 | 5 |
| hsa-miR-708 | ZNF324  | 1 | 1 | 0 | 1 | 0 | 0 | 1 | 0 | 0 | 1 | 5 |
| hsa-miR-708 | ZNF324B | 0 | 1 | 0 | 1 | 0 | 0 | 1 | 0 | 0 | 1 | 4 |
| hsa-miR-708 | ZNF35   | 1 | 1 | 0 | 1 | 0 | 0 | 1 | 0 | 0 | 1 | 5 |
| hsa-miR-708 | ZNF398  | 1 | 0 | 0 | 1 | 0 | 0 | 1 | 0 | 0 | 1 | 4 |
| hsa-miR-708 | ZNF41   | 1 | 0 | 0 | 1 | 0 | 0 | 1 | 0 | 0 | 1 | 4 |
| hsa-miR-708 | ZNF416  | 1 | 1 | 0 | 1 | 0 | 0 | 1 | 0 | 0 | 1 | 5 |
| hsa-miR-708 | ZNF425  | 1 | 1 | 0 | 1 | 0 | 0 | 1 | 0 | 0 | 0 | 4 |
| hsa-miR-708 | ZNF428  | 1 | 1 | 0 | 1 | 0 | 0 | 1 | 0 | 0 | 0 | 4 |
| hsa-miR-708 | ZNF436  | 1 | 0 | 0 | 1 | 0 | 0 | 1 | 0 | 0 | 1 | 4 |
| hsa-miR-708 | ZNF445  | 0 | 1 | 0 | 1 | 0 | 0 | 1 | 0 | 0 | 1 | 4 |
| hsa-miR-708 | ZNF462  | 1 | 1 | 0 | 1 | 0 | 0 | 1 | 0 | 0 | 0 | 4 |
| hsa-miR-708 | ZNF483  | 1 | 1 | 0 | 1 | 0 | 0 | 0 | 0 | 0 | 1 | 4 |
| hsa-miR-708 | ZNF488  | 1 | 1 | 0 | 1 | 0 | 0 | 1 | 0 | 0 | 1 | 5 |
| hsa-miR-708 | ZNF497  | 1 | 1 | 0 | 1 | 0 | 0 | 1 | 0 | 0 | 0 | 4 |
| hsa-miR-708 | ZNF507  | 1 | 1 | 0 | 1 | 0 | 0 | 1 | 0 | 0 | 1 | 5 |
| hsa-miR-708 | ZNF512  | 0 | 1 | 0 | 1 | 0 | 0 | 1 | 0 | 0 | 1 | 4 |
| hsa-miR-708 | ZNF518A | 1 | 1 | 0 | 1 | 0 | 0 | 1 | 0 | 0 | 1 | 5 |
| hsa-miR-708 | ZNF557  | 1 | 1 | 0 | 1 | 0 | 0 | 0 | 0 | 0 | 1 | 4 |
| hsa-miR-708 | ZNF558  | 1 | 1 | 0 | 0 | 0 | 0 | 1 | 0 | 0 | 1 | 4 |
| hsa-miR-708 | ZNF559  | 1 | 1 | 0 | 1 | 0 | 0 | 1 | 0 | 0 | 0 | 4 |
| hsa-miR-708 | ZNF569  | 1 | 1 | 0 | 1 | 0 | 0 | 1 | 0 | 0 | 0 | 4 |
| hsa-miR-708 | ZNF584  | 1 | 1 | 0 | 1 | 0 | 0 | 1 | 0 | 0 | 0 | 4 |
| hsa-miR-708 | ZNF586  | 1 | 1 | 0 | 1 | 0 | 0 | 1 | 0 | 0 | 0 | 4 |
| hsa-miR-708 | ZNF589  | 1 | 1 | 0 | 1 | 0 | 0 | 1 | 0 | 0 | 1 | 5 |
| hsa-miR-708 | ZNF605  | 0 | 1 | 0 | 1 | 0 | 0 | 1 | 0 | 0 | 1 | 4 |
| hsa-miR-708 | ZNF614  | 1 | 1 | 0 | 1 | 0 | 0 | 1 | 0 | 0 | 1 | 5 |
| hsa-miR-708 | ZNF615  | 1 | 1 | 0 | 1 | 0 | 0 | 1 | 0 | 0 | 1 | 5 |
| hsa-miR-708 | ZNF618  | 0 | 1 | 0 | 1 | 0 | 0 | 1 | 0 | 0 | 1 | 4 |



|             |         |   |   |   |   |   |   |   |   |   |   |   |
|-------------|---------|---|---|---|---|---|---|---|---|---|---|---|
| hsa-miR-708 | ZNF629  | 1 | 1 | 0 | 1 | 0 | 0 | 1 | 0 | 0 | 1 | 5 |
| hsa-miR-708 | ZNF652  | 0 | 1 | 0 | 1 | 0 | 0 | 1 | 0 | 0 | 1 | 4 |
| hsa-miR-708 | ZNF662  | 1 | 1 | 0 | 1 | 0 | 0 | 0 | 0 | 0 | 1 | 4 |
| hsa-miR-708 | ZNF664  | 0 | 1 | 0 | 1 | 0 | 0 | 1 | 0 | 0 | 1 | 4 |
| hsa-miR-708 | ZNF665  | 1 | 1 | 0 | 1 | 0 | 0 | 1 | 0 | 0 | 1 | 5 |
| hsa-miR-708 | ZNF74   | 1 | 1 | 0 | 0 | 0 | 0 | 1 | 0 | 0 | 1 | 4 |
| hsa-miR-708 | ZNF740  | 1 | 1 | 0 | 1 | 0 | 0 | 1 | 0 | 0 | 1 | 5 |
| hsa-miR-708 | ZNF776  | 1 | 1 | 0 | 1 | 0 | 0 | 1 | 0 | 0 | 1 | 5 |
| hsa-miR-708 | ZNF831  | 1 | 1 | 0 | 1 | 0 | 0 | 1 | 0 | 0 | 0 | 4 |
| hsa-miR-708 | ZNRF3   | 1 | 1 | 0 | 1 | 0 | 0 | 1 | 0 | 0 | 1 | 5 |
| hsa-miR-708 | ZSCAN22 | 1 | 1 | 0 | 1 | 0 | 0 | 1 | 0 | 0 | 0 | 4 |
| hsa-miR-708 | ZSCAN29 | 1 | 1 | 0 | 1 | 0 | 0 | 1 | 0 | 0 | 1 | 5 |
| hsa-miR-708 | ZSWIM5  | 1 | 1 | 0 | 1 | 0 | 0 | 1 | 0 | 0 | 1 | 5 |
| hsa-miR-708 | ZXDC    | 1 | 1 | 0 | 1 | 0 | 0 | 1 | 0 | 0 | 0 | 4 |

---

**Table 9. GO enrichment analysis for the possible target genes of mir-708.**

| <b>most significantly enriched GO term</b>                            | <b>count</b> | <b>p-Value</b> | <b>q-Value</b> |
|-----------------------------------------------------------------------|--------------|----------------|----------------|
| GO:0006355 regulation of transcription, DNA-dependent                 | 257          | 4.86736E-22    | 1.29796E-21    |
| GO:0007050 cell cycle arrest                                          | 129          | 2.45324E-17    | 2.8037E-17     |
| GO:0006350 transcription                                              | 148          | 2.49034E-16    | 2.21363E-16    |
| GO:0030511 positive regulation of TGF beta receptor signaling pathway | 102          | 2.64123E-06    | 3.38077E-07    |
| GO:0008285 negative regulation of cell proliferation                  | 86           | 7.90766E-12    | 4.86625E-12    |
| GO:0007399 nervous system development                                 | 59           | 2.47789E-07    | 4.68473E-08    |
| GO:0044419 interspecies interaction between organisms                 | 63           | 4.52349E-16    | 3.61879E-16    |

(It is not all the consequence)
